1 **Environmental and epigenetic regulation of *Rider* retrotransposons in**  
2 **tomato**

3

4 Matthias Benoit<sup>1, 6</sup>, Hajk-Georg Drost<sup>1</sup>, Marco Catoni<sup>1, 3</sup>, Quentin Gouil<sup>2, 4</sup>,  
5 Sara Lopez-Gomollon<sup>2</sup>, David Baulcombe<sup>2</sup> and Jerzy Paszkowski<sup>1, 5, 6</sup>

6

7 **Affiliation**

8 <sup>1</sup> The Sainsbury Laboratory, University of Cambridge, Cambridge CB2 1LR,  
9 United Kingdom

10 <sup>2</sup> Department of Plant Sciences, University of Cambridge, Cambridge CB2  
11 3EA, United Kingdom

12 <sup>3</sup> Present address: School of Biosciences, University of Birmingham,  
13 Birmingham, United Kingdom

14 <sup>4</sup> Present address: Walter and Eliza Hall Institute of Medical Research, 1G  
15 Royal Parade, Parkville 3052, Australia

16 <sup>5</sup> Present address: Radachowka 37, 05-340 Kolbiel, Poland

17 <sup>6</sup> Corresponding authors:

18 Matthias Benoit: [matthias.benoit@slcu.cam.ac.uk](mailto:matthias.benoit@slcu.cam.ac.uk)

19 Jerzy Paszkowski: [jurek@paszkowski.com](mailto:jurek@paszkowski.com)

20

21 **Contact Information**

22 Matthias Benoit: [matthias.benoit@slcu.cam.ac.uk](mailto:matthias.benoit@slcu.cam.ac.uk)

23 Hajk-Georg Drost: [hajk-georg.drost@slcu.cam.ac.uk](mailto:hajk-georg.drost@slcu.cam.ac.uk)

24 Marco Catoni: [m.catoni@bham.ac.uk](mailto:m.catoni@bham.ac.uk)

25 Quentin Gouil: [gouil.q@wehi.edu.au](mailto:gouil.q@wehi.edu.au)

26 Sara Lopez-Gomollon: [sl750@cam.ac.uk](mailto:sl750@cam.ac.uk)

27 David Baulcombe: [dcb40@cam.ac.uk](mailto:dcb40@cam.ac.uk)

28 Jerzy Paszkowski: [jurek@paszkowski.com](mailto:jurek@paszkowski.com)

29

30 **Running Title**

31 Environmental and epigenetic control of *Rider* retrotransposons

32 **Keywords**

33 Tomato; LTR retrotransposon; drought stress; abscisic acid; small RNAs;

34 DNA methylation

35 **ABSTRACT**

36

37 Transposable elements in crop plants are the powerful drivers of phenotypic  
38 variation that has been selected during domestication and breeding programs.

39 In tomato, transpositions of the LTR (long terminal repeat) retrotransposon  
40 family *Rider* have contributed to various phenotypes of agronomical interest,  
41 such as fruit shape and colour. However, the mechanisms regulating *Rider*  
42 activity are largely unknown. We have developed a bioinformatics pipeline for  
43 the functional annotation of retrotransposons containing LTRs and defined all  
44 full-length *Rider* elements in the tomato genome. Subsequently, we showed  
45 that accumulation of *Rider* transcripts and transposition intermediates in the  
46 form of extrachromosomal DNA is triggered by drought stress and relies on  
47 abscisic acid signalling. We provide evidence that residual activity of *Rider* is  
48 controlled by epigenetic mechanisms involving siRNAs and the RNA-  
49 dependent DNA methylation pathway. Finally, we demonstrate the broad  
50 distribution of *Rider-like* elements in other plant species, including crops. Thus  
51 our work identifies *Rider* as an environment-responsive element and a  
52 potential source of genetic and epigenetic variation in plants.

53

54

## 55 INTRODUCTION

56

57 Transposable elements (TEs) replicate and move within host genomes.  
58 Based on their mechanisms of transposition, TEs are either DNA transposons  
59 that use a cut-and-paste mechanism or retrotransposons that transpose  
60 through an RNA intermediate via a copy-and-paste mechanism [1]. TEs make  
61 up a significant part of eukaryotic chromosomes and are a major source of  
62 genetic instability that, when active, can induce deleterious mutations. Various  
63 mechanisms have evolved that protect plant genomes, including the  
64 suppression of TE transcription by epigenetic silencing that restricts TE  
65 movement and accumulation [2–5].

66 Chromosomal copies of transcriptionally silenced TEs are typically  
67 hypermethylated at cytosine residues and are associated with nucleosomes  
68 containing histone H3 di-methylated at lysine 9 (H3K9me2). In addition, they  
69 are targeted by 24-nt small interfering RNAs (24-nt siRNAs) that guide RNA-  
70 dependent DNA methylation (RdDM), forming a self-reinforcing silencing loop  
71 [6–8]. Interference with these mechanisms can result in the activation of  
72 transposons. For example, loss of DNA METHYLTRANSFERASE 1 (MET1),  
73 the main methyltransferase maintaining methylation of cytosines preceding  
74 guanines (CGs), results in the activation of various TE families in *Arabidopsis*  
75 [9–11] and in rice [12]. Mutation of CHROMOMETHYLASE 3 (CMT3),  
76 mediating DNA methylation outside CGs, triggers the mobilization of several  
77 TE families, including *CACTA* elements in *Arabidopsis* [10] and *Tos17* and  
78 *Tos19* in rice [13]. Interference with the activity of the chromatin remodelling  
79 factor DECREASE IN DNA METHYLATION 1 (DDM1), as well as various  
80 components of the RdDM pathway, leads to the activation of specific subsets  
81 of TEs in *Arabidopsis*. These include DNA elements *CACTA* and *MULE*, as  
82 well as retrotransposons *ATGP3*, *COPIA13*, *COPIA21*, *VANDAL21*, *EVADÉ*  
83 and *DODGER* [14–17]. Similarly, loss of *OsDDM1* genes in rice results in the  
84 transcriptional activation of TE-derived sequences [18].

85 In addition to interference with epigenetic silencing, TE activation can  
86 also be triggered by environmental stresses. In her pioneering studies,  
87 Barbara McClintock denoted TEs as “controlling elements”, thus suggesting  
88 that they are activated by genomic stresses and are able to regulate the

89 activities of genes [19, 20]. In the meantime, a plethora of stress-induced TEs  
90 have been described, including retrotransposons. For example, the biotic  
91 stress-responsive *Tnt1* and *Tto1* families in tobacco [21,22], the cold-  
92 responsive *Tcs* family in citrus [23], the virus-induced *Bs1* retrotransposon in  
93 maize [24], the heat-responsive retrotransposons *Go-on* in rice [25], and  
94 *ONSEN* in Arabidopsis [26,27]. While heat-stress is sufficient to trigger  
95 *ONSEN* transcription and the formation of extrachromosomal DNA (ecDNA),  
96 transposition was observed only after the loss of siRNAs, suggesting that the  
97 combination of impaired epigenetic control and environmental stress is a  
98 prerequisite for *ONSEN* transposition [28]. Interestingly, retrotransposition  
99 occurs during flower development, which fuels the diversification of *ONSEN*  
100 insertion patterns in the progenies of plants permitting *ONSEN* movement  
101 [29].

102         The availability of high-quality genomic sequences revealed that LTR  
103 (Long Terminal Repeat) retrotransposons make up a significant proportion of  
104 plant chromosomes, from approximately 10% in Arabidopsis, 25% in rice,  
105 42% in soybean, and up to 75% in maize [30]. In tomato (*Solanum*  
106 *lycopersicum*), a model crop plant for research on fruit development, LTR  
107 retrotransposons make up about 60% of the genome [31]. Despite the  
108 abundance of retrotransposons in the tomato genome, only a limited number  
109 of studies have linked TE activities causally to phenotypic alterations.  
110 Remarkably, the most striking examples described so far involve the  
111 retrotransposon family *Rider*. For example, fruit shape variation is based on  
112 copy number variation of the *SUN* gene, which underwent *Rider*-mediated  
113 trans-duplication from chromosome 10 to chromosome 7. The new insertion  
114 of the *SUN* gene into chromosome 7 in the variety “Sun1642” results in its  
115 overexpression and consequently in the elongated tomato fruits that were  
116 subsequently selected by breeders [32,33]. The *Rider* element generated an  
117 additional *SUN* locus on chromosome 7 that encompassed more than 20 kb  
118 of the ancestral *SUN* locus present on chromosome 10 [32]. This large  
119 “hybrid” retroelement landed in the fruit-expressed gene *DEFL1*, resulting in  
120 high and fruit-specific expression of the *SUN* gene containing the  
121 retroelement [33]. The transposition event was estimated to have occurred

122 within the last 200-500 years, suggesting that duplication of the *SUN* gene  
123 occurred after tomato domestication [34].

124 Jointless pedicel is a further example of a *Rider*-induced tomato  
125 phenotype that has been selected during tomato breeding. This phenotypic  
126 alteration reduces fruit dropping and thus facilitates mechanical harvesting.  
127 Several independent jointless alleles were identified around 1960 [35–37].  
128 One of them involves a new insertion of *Rider* into the first intron of the  
129 *SEPALLATA* MADS-Box gene, *Solyc12g038510*, that provides an alternative  
130 transcription start site and results in an early nonsense mutation [38]. Also,  
131 the ancestral yellow flesh mutation in tomato is due to *Rider*-mediated  
132 disruption of the *PSY1* gene, which encodes a fruit-specific phytoene  
133 synthase involved in carotenoid biosynthesis [39,40]. Similarly, the “potato  
134 leaf” mutation is due to a *Rider* insertion in the *C* locus controlling leaf  
135 complexity [41]. *Rider* retrotransposition is also the cause of the chlorotic  
136 tomato mutant *fer*, identified in the 1960s [42]. This phenotype has been  
137 linked to *Rider*-mediated disruption of the *FER* gene encoding a bHLH-  
138 transcription factor. *Rider* landed in the first exon of the gene [43,44].  
139 Sequence analysis of the element revealed that the causative copy of *Rider* is  
140 identical to that involved in the *SUN* gene duplication [44].

141 The *Rider* family belongs to the *Copia* superfamily and is ubiquitous in  
142 the tomato genome [33,44]. Based on partial tomato genome sequences, the  
143 number of *Rider* copies was estimated to be approximately 2000 [33].  
144 Previous DNA blots indicated that *Rider* is also present in wild tomato  
145 relatives but is absent from the genomes of potato, tobacco, and coffee,  
146 suggesting that amplification of *Rider* happened after the divergence of potato  
147 and tomato approximately 6.2 mya [44,45]. The presence of *Rider* in  
148 unrelated plant species has also been suggested [46]. However, incomplete  
149 sub-optimal sampling and the low quality of genomic sequence assemblies  
150 has hindered a comprehensive survey of *Rider* elements within the plant  
151 kingdom.

152 Considering that the *Rider* family is a major source of phenotypic  
153 variation in tomato, it is surprising that its members and their basic activities,  
154 as well as their responsiveness and the possible triggers of environmental  
155 super-activation, which explain the evolutionary success of this family, remain

156 largely unknown. Contrary to the majority of TEs characterized to date,  
157 previous analyses revealed that *Rider* is constitutively transcribed and  
158 produces full-length transcripts in tomato [33], but the stimulatory conditions  
159 promoting reverse transcription of *Rider* transcripts that results in  
160 accumulation as extrachromosomal DNA are unknown.

161 To fill these gaps, we provide here a refined annotation of full-length  
162 *Rider* elements in tomato using the most recent genome release (SL3.0). We  
163 reveal environmental conditions facilitating *Rider* activation and show that  
164 *Rider* transcription is enhanced by dehydration stress mediated by abscisic  
165 acid (ABA) signalling, which also triggers accumulation of extrachromosomal  
166 DNA. Moreover, we provide evidence that RdDM controls *Rider* activity  
167 through siRNA production and partially through DNA methylation. Finally, we  
168 have performed a comprehensive cross-species comparison of full-length  
169 *Rider* elements in 110 plant genomes, including diverse tomato relatives and  
170 major crop plants, in order to characterise species-specific *Rider* features in  
171 the plant kingdom. Together, our findings suggest that *Rider* is a drought  
172 stress-induced retrotransposon ubiquitous in diverse plant species that may  
173 have contributed to phenotypic variation through the generation of genetic and  
174 epigenetic alterations induced by historical drought periods.

175  
176

177 **METHODS**

178

179 ***Plant material and growth conditions***

180

181 Tomato plants were grown under standard greenhouse conditions (16 h at  
182 25°C with supplemental lighting of 88 w/m<sup>2</sup> and 8 h at 15°C without). *flacca*  
183 (*flc*), *notabilis* (*not*), and *sitiens* (*sit*) seeds were obtained from Andrew  
184 Thompson, Cranfield University; the *slnrpd1* and *slnrpe1* plants were  
185 described before [47]. For aseptic growth, seeds of *Solanum lycopersicum* cv.  
186 Ailsa Craig were surface-sterilized in 20% bleach for 10 min, rinsed three  
187 times with sterile H<sub>2</sub>O, germinated and grown on half-strength MS media (16  
188 h light and 8 h dark at 24°C).

189

190 ***Stress treatments***

191

192 For dehydration stress, two-week-old greenhouse-grown plants were  
193 subjected to water deprivation for two weeks. For NaCl and mannitol  
194 treatments, tomato seedlings were grown aseptically for two weeks prior to  
195 transfer into half-strength MS solution containing 100, 200 or 300 nM NaCl or  
196 mannitol (Sigma) for 24 h. For abscisic acid (ABA) treatments, tomato  
197 seedlings were grown aseptically for two weeks prior to transfer into half-  
198 strength MS solution containing 0.5, 5, 10 or 100 µM ABA (Sigma) for 24 h.  
199 For 5-azacytidine treatments, tomato seedlings were germinated and grown  
200 aseptically on half-strength MS media containing 50 nM 5-azacytidine (Sigma)  
201 for two weeks. For cold stress experiments, two-week-old aseptically grown  
202 plants were transferred to 4°C for 24 h prior to sampling.

203

204 ***RNA extraction and quantitative RT-PCR analysis***

205

206 Total RNA was extracted from 200 mg quick-frozen tissue using the TRI  
207 Reagent (Sigma) according to the manufacturer's instructions and  
208 resuspended in 50 µL H<sub>2</sub>O. The RNA concentration was estimated using the  
209 Qubit Fluorometric Quantitation system (Thermo Fisher). cDNAs were  
210 synthesized using a SuperScript VILO cDNA Synthesis Kit (Invitrogen). Real-

211 time quantitative PCR was performed in the LightCycler 480 system (Roche)  
212 using primers listed in Table S1. LightCycler 480 SYBR Green I Master  
213 premix (Roche) was used to prepare the reaction mixture in a volume of 10  
214  $\mu\text{L}$ . Transcript levels were normalized to *SIACTIN* (*Solyc03g078400*). The  
215 results were analysed by the  $\Delta\Delta\text{Ct}$  method.

216

### 217 ***DNA extraction and copy number quantification***

218

219 Tomato DNA was extracted using the Qiagen DNeasy Plant Mini Kit (Qiagen)  
220 following the manufacturer's instructions and resuspended in 30  $\mu\text{L}$   $\text{H}_2\text{O}$ . DNA  
221 concentration was estimated using the Qubit Fluorometric Quantitation  
222 system (Thermo Fisher). Quantitative PCR was performed in the LightCycler  
223 480 system (Roche) using primers listed in Table S1. LightCycler 480 SYBR  
224 Green I Master premix (Roche) was used to prepare the reaction in a volume  
225 of 10  $\mu\text{L}$ . DNA copy number was normalized to *SIACTIN* (*Solyc03g078400*).  
226 Results were analysed by the  $\Delta\Delta\text{Ct}$  method.

227

### 228 ***Extrachromosomal circular DNA detection***

229

230 Extrachromosomal circular DNA amplification was derived from the previously  
231 published mobilome analysis [11]. In brief, extrachromosomal circular DNA  
232 was separated from chromosomal DNA using PlasmidSafe ATP-dependent  
233 DNase (EpiCentre) according to the manufacturer's instructions with the  
234 incubation at 37°C extended to 17 h. The PlasmidSafe exonuclease degrades  
235 linear DNA and thus safeguards circular DNA molecules. Circular DNA was  
236 precipitated overnight at -20°C in 0.1 v/v 3 M sodium acetate (pH 5.2), 2.5 v/v  
237 EtOH and 1  $\mu\text{L}$  glycogen (Sigma). The pellet was resuspended in 20  $\mu\text{L}$   $\text{H}_2\text{O}$ .  
238 Inverse PCR reactions were carried out with 2  $\mu\text{L}$  of DNA solution in a final  
239 volume of 20  $\mu\text{L}$  using the GoTaq enzyme (Promega). The PCR conditions  
240 were as follows: denaturation at 95°C for 5 min, followed by 30 cycles at 95°C  
241 for 30 s, an annealing step for 30 s, an elongation step at 72°C for 60 s, and a  
242 final extension step at 72°C for 5 min. PCR products were separated in 1%  
243 agarose gels and developed by NuGenius (Syngene). Bands were extracted  
244 using the Qiagen Gel Extraction Kit and eluted in 30  $\mu\text{L}$   $\text{H}_2\text{O}$ . Purified



245 amplicons were subjected to Sanger sequencing. Primer sequences are listed  
246 in Table S1.

247

### 248 ***Phylogenetic analysis of de novo identified Rider elements***

249

250 A phylogenetic tree was constructed from the nucleotide sequences of the 71  
251 *Rider* elements using Geneious 9.1.8 ([www.geneious.com](http://www.geneious.com)) and built with the  
252 Tamura-Nei neighbor joining method. Pairwise alignment for the building  
253 distance matrix was obtained using a global alignment with free end gaps and  
254 a cost matrix of 51% similarity.

255

### 256 ***Distribution analysis***

257

258 Genomic coordinates of each of the 71 *Rider* elements identified by *de novo*  
259 annotation using *LTRpred* (<https://github.com/HajkD/LTRpred>) have been  
260 used to establish their chromosomal locations. Coordinates for centromeres  
261 were provided before [31] and pericentromeric regions were defined by high  
262 levels of DNA methylation and H3K9me2.

263

### 264 ***Accession numbers***

265

266 The Genbank accession number of the reference *Rider* nucleotide sequence  
267 identified in [44] is EU195798.2. We used *Solanum lycopersicum* bisulfite and  
268 small RNA sequencing data (SRP081115) generated in [47].

269

### 270 ***Dating of insertion time***

271

272 Insertion times of *Rider* elements were estimated using the method described  
273 in [44]. Degrees of divergence between LTRs of each individual element were  
274 determined using *LTRpred*. LTR divergence rates were then converted into  
275 dates using the average substitution rate of  $6.96 \times 10^{-9}$  substitutions per  
276 synonymous site per year for tomato [48].

277

### 278 ***Bisulfite sequencing analysis***

279 We collected data from previously published BS-seq libraries of tomato  
280 mutants of RNA polymerase IV and V and controls [47]: *slnrpe1*  
281 (SRR4013319), *slnrpd1* (SRR4013316), wild type CAS9 (SRR4013314) and  
282 not transformed wild type (SRR4013312). The raw reads were analysed using  
283 our previously established pipeline [49] and aligned to the *Solanum*  
284 *lycopersicum* reference version SL3.0  
285 ([www.solgenomics.net/organism/Solanum\\_lycopersicum/genome](http://www.solgenomics.net/organism/Solanum_lycopersicum/genome)). The  
286 chloroplast sequence (NC\_007898) was used to estimate the bisulfite  
287 conversion (on average above 99%). The R package DMRcaller [50] was  
288 used to summarize the level of DNA methylation in the three cytosine contexts  
289 for each *Rider* copy.

290

### 291 **Small RNA sequencing analysis**

292

293 Tomato siRNA libraries were obtained from [47] and analysed using the same  
294 analysis pipeline to align reads to the tomato genome version SL3.0. Briefly,  
295 the reads were trimmed with Trim Galore!  
296 ([www.bioinformatics.babraham.ac.uk/projects/trim\\_galore](http://www.bioinformatics.babraham.ac.uk/projects/trim_galore)) and mapped using  
297 the ShortStack software v3.6 [51]. The siRNA counts on the loci overlapping  
298 *Rider* copies were calculated with R and the package Genomic Ranges.

299

### 300 **Genome sequence data**

301

302 Computationally reproducible analysis and annotation scripts for the following  
303 sections can be found at <http://github.com/HajkD/RIDER>.

304

### 305 **Genomic data retrieval**

306

307 We retrieved genome assemblies for 110 plant species (Table S2) from NCBI  
308 RefSeq [52] using the *meta.retrieval* function from the R package *biomartr*  
309 [53]. For *Solanum lycopersicum*, we retrieved the most recent genome  
310 assembly version SL3.0 from the *Sol Genomics Network*  
311 [ftp://ftp.solgenomics.net/tomato\\_genome/assembly/build\\_3.00/S\\_lycopersicu](ftp://ftp.solgenomics.net/tomato_genome/assembly/build_3.00/S_lycopersicum_chromosomes.3.00.fa)  
312 [m\\_chromosomes.3.00.fa](ftp://ftp.solgenomics.net/tomato_genome/assembly/build_3.00/S_lycopersicum_chromosomes.3.00.fa) [54].

313

314 **Functional *de novo* annotation of LTR retrotransposons in *Solanaceae***

315 **genomes**

316

317 Functional *de novo* annotations of LTR retrotransposons for seventeen  
318 genomes from the *Asterids*, *Rosids*, and *monocot* clades (*Asterids*: *Capsicum*  
319 *annuum*, *C. baccatum* MLFT02\_5, *C. chinense* MCIT02\_5, *Coffea canephora*,  
320 *Petunia axillaris*, *Phytophthora inflata*, *Solanum arcanum*, *S. habrochaites*, *S.*  
321 *lycopersicum*, *S. melongena*, *S. pennellii*, *S. pimpinellifolium*, *S. tuberosum*;  
322 *Rosids*: *Arabidopsis thaliana*, *Vitis vinifera*, and *Cucumis melo*; *Monocots*:  
323 *Oryza sativa*) were generated using the *LTRpred.meta* function from the  
324 *LTRpred* annotation pipeline (<https://github.com/HajkD/LTRpred>; also used in  
325 [25]). To retrieve a consistent and comparable set of functional annotations for  
326 all genomes, we consistently applied the following *LTRpred* parameter  
327 configurations to all *Solanaceae* genomes: minlenltr = 100, maxlenltr = 5000,  
328 mindisltr = 4000, maxdisltr = 30000, mintsd = 3, maxtsd = 20, vic = 80,  
329 overlaps = "no", xdrop = 7, motifmis = 1, pbsradius = 60, pbsalilen = c(8,40),  
330 pbsoffset = c(0,10), quality.filter = TRUE, n.orf = 0. The plant-specific tRNAs  
331 used to screen for primer binding sites (PBS) were retrieved from GtRNAdb  
332 [55] and plant RNA [56] and combined in a custom *fasta* file. The hidden  
333 Markov model files for gag and pol protein conservation screening were  
334 retrieved from Pfam [57] using the protein domains RdRP\_1 (PF00680),  
335 RdRP\_2 (PF00978), RdRP\_3 (PF00998), RdRP\_4 (PF02123), RVT\_1  
336 (PF00078), RVT\_2 (PF07727), Integrase DNA binding domain (PF00552),  
337 Integrase zinc binding domain (PF02022), Retrotrans\_gag (PF03732), RNase  
338 H (PF00075), and Integrase core domain (PF00665).

339

340 **Sequence clustering of functional LTR retrotransposons from 17**

341 **genomes**

342

343 We combined the *de novo* annotated LTR retrotransposons of the 17 species  
344 mentioned in the previous section in a large *fasta* file and used the cluster  
345 program *VSEARCH* [58] with parameter configurations: *vsearch --cluster\_fast*  
346 *--qmask none --id 0.85 --clusterout\_sort --clusterout\_id --strand both --*

347 *blast6out* ---sizeout to cluster LTR retrotransposons by nucleotide sequence  
348 homology (global sequence alignments). Next, we retrieved the 85%  
349 sequence homology clusters from the *VSEARCH* output and screened for  
350 clusters containing *Rider* sequences. This procedure enabled us to detect  
351 high sequence homology (>85%) sequences of *Rider* across diverse species.  
352

### 353 **Nucleotide BLAST search of *Rider* against 110 plant genomes**

354  
355 To determine the distribution of *Rider* related sequences across the plant  
356 kingdom, we performed BLASTN [59] searches of *Rider* (= query sequence)  
357 using the function *blast\_genomes* from the R package *metablastr*  
358 (<https://github.com/HajkD/metablastr>) against 110 plant genomes (Table S2)  
359 and the parameter configuration: *blastn -eval 1E-5 -max\_target\_seqs 5000*.  
360 As a result, we retrieved a BLAST hit table containing 11,748,202 BLAST hits.  
361 Next, we filtered for hits that contained at least 50% sequence coverage (=   
362 sequence homology) and throughout at least 50% sequence length homology  
363 to the reference *Rider* sequence. This procedure reduced the initial  
364 11,748,202 BLAST hits to 57,845 hits, which we further refer to as *Rider-like*  
365 elements. These 57,845 *Rider-like* elements are distributed across 21 species  
366 with various abundance frequencies. In a second step, we performed an  
367 analogous BLASTN search using only the 5' LTR sequence of *Rider* to  
368 determine the distribution of *Rider-like* LTR across the plant kingdom. Using  
369 the same BLASTN search strategy described above, we retrieved 9,431 hits.  
370 After filtering for hits that contained at least 50% percent sequence coverage  
371 (= sequence homology) and at least 50% sequence length homology to the  
372 reference *Rider* LTR sequence, we obtained 2,342 BLAST hits distributed  
373 across five species.

374

### 375 **Motif enrichment analysis**

376

377 We tested the enrichment of *cis*-regulatory elements (CREs) in *Rider*  
378 compared to randomly sampled sequence loci from the same genome using  
379 the following procedure: first we sampled 1000 DNA sequences with the same  
380 length as the reference *Rider* sequence from 1000 randomly sampled loci in

381 the tomato reference genome. When sampling, we also considered the strand  
382 direction of the reference *Rider* sequence. Whenever a *Rider* sequence was  
383 annotated in the plus direction, we also sampled the corresponding set of  
384 random sequences in the plus direction of the respective randomly drawn  
385 locus. In contrast, when a *Rider* sequence was annotated in the minus  
386 direction, we also sampled the corresponding set of random sequences in the  
387 minus direction. Second, we counted CRE occurrences for each *Rider*  
388 sequence independently and for a set of different CREs. Next, we counted the  
389 number of the same CRE occurrences for each random sequence  
390 independently to assess how often these CREs were found in random  
391 sequences. We then constructed a 2x2 contingency table containing the  
392 respective motif count data of CRE observations in true *Rider* sequences  
393 versus counts in random sequences. We performed a Fisher's exact test for  
394 count data to assess the statistical significance of enrichment between the  
395 motif count data retrieved from *Rider* sequences and the motif count data  
396 retrieved from random sequences. The resulting *P*-values are shown in  
397 Tables S3 and S4 and the computationally reproducible scripts to perform the  
398 motif count analysis can be found at <https://github.com/HajkD/RIDER>.

399

#### 400 **Calculation of N50 metric**

401

402 To assess the genome quality of *Solanaceae* species, we calculated the N50  
403 metric for the genome assemblies of *Solanum lycopersicum*, *S.*  
404 *pimpinellifolium*, *S. arcanum*, *S. pennellii*, *S. habrochaites*, and *S. tuberosum*  
405 using the following procedure. First, we imported the scaffolds or  
406 chromosomes of each respective genome assembly using the R function  
407 *read\_genome()* from the *biomartr* package. Next, for each species individually  
408 we determined the sequence length for each scaffold or chromosome and  
409 sorted them according to length in descending order. The N50 value in Mbp  
410 was then calculated in R as follows:  $N50 \leftarrow \text{len.sorted}[\text{cumsum}(\text{len.sorted}) \geq$   
411  $\text{sum}(\text{len.sorted}) * 0.5][1] / 1000000$ , where the variable *len.sorted* denotes the  
412 vector storing the ordered scaffold or chromosome lengths of a genome  
413 assembly.

## 414 RESULTS

415

### 416 Family structure of *Rider* retrotransposons in tomato

417

418 We used the most recent SL3.0 tomato genome release for *de novo*  
419 annotation of *Rider* elements. First, we retrieved full-length, potentially  
420 autonomous retrotransposons using our functional annotation pipeline  
421 (*LTRpred*, see Materials and Methods). We detected a set of 5844 potentially  
422 intact LTR retrotransposons (Table S5). Homology search among these  
423 elements identified 71 elements that share >85% similarity with the reference  
424 *Rider* sequence [44] and thus belong to the *Rider* family. We then determined  
425 the distribution of these *Rider* elements along the tomato chromosomes  
426 (Figure 1A) and also estimated their age based on sequence divergence  
427 between 5' and 3' LTRs (Figure 1A). We classified these elements into three  
428 categories according to their LTR similarity: 80-95%, 95-98% and 98-100%  
429 (Figure S1A). While the first category contains relatively old copies (last  
430 transposition between 10.5 and 3.5 mya), the 95-98% class represents *Rider*  
431 elements that moved between 3.5 and 1.4 mya, and the 98-100% category  
432 includes the youngest *Rider* copies that transposed within the last 1.4 my  
433 (Figure S1A). Out of 71 *Rider* family members, 14 were found in euchromatic  
434 chromosome arms (14/71 or 19.7%) and 57 in heterochromatic regions  
435 (80.3%) (Table 1). In accordance with previous observations based on partial  
436 genomic sequences [33], young *Rider* elements of the 98-100% class are  
437 more likely to reside in the proximity of genes, with 50% within 2 kb of a gene.  
438 This was the case for only 37.5% of old *Rider* members (85-95% class) (Table  
439 2). Such a distribution is consistent with the preferential presence of young  
440 elements within euchromatic chromosome arms (50%, 5/10) compared to old  
441 *Rider* elements (9.4%, 3/32) (Table 2 and Figure S1B). The phylogenetic  
442 distance between individual elements is moderately correlated to the age of  
443 each element (Figure 1B) (Table S6), suggesting that the recent amplification  
444 of *Rider* was due to the activity of young intact elements.

445

446

447

## 448 ***Rider* is a drought- and ABA-responsive retrotransposon**

449

450 To better understand the activation triggers and, thus, the mechanisms  
451 involved in the accumulation of *Rider* elements in the tomato genome, we  
452 examined possible environmental stresses and host regulatory mechanisms  
453 influencing their activity. Transcription of an LTR retroelement initiates in its 5'  
454 LTR and is regulated by an adjacent promoter region that usually contains *cis*-  
455 regulatory elements (CREs) (reviewed in [60]). Therefore, we aligned the  
456 sequence of the *Rider* promoter region against sequences stored in the  
457 PLACE database ([www.dna.affrc.go.jp/PLACE/](http://www.dna.affrc.go.jp/PLACE/)) containing known CREs and  
458 identified several dehydration-responsive elements (DREs) and sequence  
459 motifs linked to ABA signalling (Figure 2A). First, we tested whether these  
460 CREs were significantly enriched in the LTR promoter sequences of the 71 *de*  
461 *novo* annotated *Rider* elements. Comparison of *Rider* LTRs to a set of  
462 randomly selected genomic sequences of the same length revealed  
463 significant enrichment of several CREs in *Rider* LTRs (Fisher's exact test  
464  $P < 0.001$ ) (Table S3). It is known, for example, that the CGCG sequence motif  
465 at position 89-94 (Figure 2A) is recognized by transcriptional regulators  
466 binding calmodulin. These are products of signal-responsive genes activated  
467 by various environmental stresses and phytohormones such as ABA [61]. We  
468 also detected two MYB recognition sequence motifs (CTGTTG at position  
469 176-181 bp, and CTGTTA at position 204-209 bp) (Figure 2A). MYB  
470 recognition sequences are usually enriched in the promoters of genes with  
471 transcriptional activation during water stress, elevated salinity, and ABA  
472 treatments [62,63]. In addition, an ABA-responsive element-like (ABRE-like)  
473 was found at position 332-337 bp in the R region of *Rider*'s LTR, along with a  
474 coupling element (CE3) located at position 357-372 bp (Figure 2A). The co-  
475 occurrence of ABRE-like and CE3 has often been found in ABA-responsive  
476 genes [64,65].

477 The simultaneous presence of these five CREs in promoters of *Rider*  
478 elements suggests that *Rider* transcription may be induced by environmental  
479 stresses such as dehydration and salinity that involves ABA mediated  
480 signalling. To test whether *Rider* transcription is stimulated by drought stress,  
481 glasshouse-grown tomato plants were subjected to water deprivation and

482 levels of *Rider* transcripts quantified by RT-qPCR (Figure 2B). When  
483 compared to control plants, we observed a 4.4-fold increase in *Rider*  
484 transcript abundance in plants subjected to drought stress. Thus, *Rider*  
485 transcription appears to be stimulated by drought.

486 To further test this finding, we re-measured levels of *Rider* transcripts  
487 in different experimental setups. *In vitro* culture conditions with increasing  
488 levels of osmotic stress were used to mimic increasing drought severity  
489 (Figure 2C). Transcript levels of *Rider* increased in a dose-dependent fashion  
490 with increasing mannitol concentration, corroborating results obtained during  
491 direct drought stress in greenhouse conditions. Interestingly, tomato seedlings  
492 treated with NaCl also exhibited increased levels of *Rider* transcripts (Figure  
493 2C).

494 ABA is a versatile phytohormone involved in plant development and  
495 abiotic stress responses, including drought stress [66]. Therefore, we asked  
496 whether *Rider* transcriptional drought-responsiveness is mediated by ABA  
497 and whether increased ABA can directly stimulate *Rider* transcript  
498 accumulation. To answer the first question, we exploited tomato mutants  
499 defective in ABA biosynthesis. The lines *flacca* (*flc*), *notabilis* (*not*) and *sitiens*  
500 (*sit*) have mutations in genes encoding a sulphurylase [67], a 9-cis-epoxy-  
501 carotenoid dioxygenase (*SINCED1*) [68,69], and an aldehyde oxidase [70],  
502 respectively. Both *flc* and *sit* are impaired in the conversion of ABA-aldehyde  
503 to ABA [67,70], while *not* is unable to catalyse the cleavage of 9-cis-  
504 violaxanthin and/or 9-cis-neoxanthin to xanthoxin, an ABA precursor [69].  
505 Glasshouse-grown *flc*, *not* and *sit* mutants and control wild-type plants were  
506 subjected to water deprivation treatment and *Rider* transcript levels quantified  
507 by RT-qPCR (Figure 2D). *Rider* transcript levels were reduced in *flc*, *not* and  
508 *sit* by 43%, 26% and 56%, respectively.

509 To examine whether ABA stimulates accumulation of *Rider* transcripts,  
510 tomato seedlings were transferred to media supplemented with increasing  
511 concentrations of ABA (Figure 2E). The levels of *Rider* transcripts increased  
512 in a dose-dependent manner with increasing ABA concentrations. This  
513 suggests that ABA is not only involved in signalling that results in hyper-  
514 activation of *Rider* transcription during drought, but it also directly promotes  
515 the accumulation of *Rider* transcripts. The effectiveness of the treatments was



516 verified by assaying expression of the stress- and ABA-responsive gene  
517 *SIASR1* (Figure S2A-F).

518 Identification in the U3 region of *Rider* LTRs of a binding domain for C-  
519 repeat binding factors (CBF), which are regulators of the cold-induced  
520 transcriptional cascade [64,71], led us to test *Rider* activation by cold stress.  
521 However, *Rider* transcription was not affected by cold treatment, leaving  
522 drought and salinity as the predominant environmental stresses identified so  
523 far that stimulate accumulation of *Rider* transcripts (Figure S2G).

524

### 525 **RdDM regulates levels of *Rider* transcripts**

526

527 The suppression of transposon-derived transcription by epigenetic  
528 mechanisms, which typically include DNA methylation, maintains genome  
529 integrity [2,3,5]. We asked whether *Rider* transcription is also restricted by  
530 DNA methylation. Tomato seedlings were grown on media supplemented with  
531 5-azacytidine, an inhibitor of DNA methyltransferases. *Rider* transcript steady-  
532 state levels increased in plants treated with 5-azacytidine compared to  
533 controls (Figure 3A). Comparison of *Rider* transcript accumulation in 5-  
534 azacytidine-treated and ABA-treated plants revealed similar levels of  
535 transcripts and the levels were similar when the treatments were applied  
536 together ( $P < 0.05$ ; Figure 3A).

537 To further examine the role of DNA methylation in controlling *Rider*  
538 transcription, we took advantage of tomato mutants defective in crucial  
539 components of the RdDM pathway, namely SINRPD1 and SINRPE1, the  
540 major subunits of RNA Pol IV and Pol V, respectively. These mutants exhibit  
541 reduced cytosine methylation at CHG and CHH sites (in which H is any base  
542 other than G) residing mostly at the chromosome arms, with *slnrpd1* showing  
543 a dramatic, genome-wide loss of 24-nt siRNAs [47]. To evaluate the role of  
544 RdDM in *Rider* transcript accumulation, we first assessed the consequences  
545 of impaired RdDM on siRNA populations at full-length *Rider* elements.  
546 Deficiency in SINRPD1 resulted in a complete loss of 24-nt siRNAs that target  
547 *Rider* elements (Figure 3B). This loss was accompanied by a dramatic  
548 increase (approximately 80-fold) in 21-22-nt siRNAs at *Rider* loci (Figure 3B).  
549 In contrast, the mutation in SINRPE1 triggered increases in both 21-22-nt and

550 24-nt siRNAs targeting *Rider* elements (Figure 3B). We then asked whether  
551 altered distribution of these siRNA classes is related to the age of the *Rider*  
552 elements and/or their chromosomal position, and thus local chromatin  
553 properties. Compilation of the genomic positions and siRNA data suggests a  
554 preferential increase in levels of 21-22-nt siRNAs in *slnrpd1*, and to a lesser  
555 extent in *slnrpe1*, for young *Rider* elements (98-100 class) and *Rider* copies  
556 located in euchromatin (Figure S3A). In contrast, accumulation of 24-nt  
557 siRNAs was not related to any particular sub-class of elements or their  
558 chromosomal positions (Figure S3B). Subsequently, we examined whether  
559 loss of SINRPD1 or SINRPE1 was sufficient to increase levels of *Rider*  
560 transcripts and observed increased accumulation of *Rider* transcripts in both  
561 *slnrpd1* and *slnrpe1* compared to WT (Figure 3C).

562 We assessed whether this increase in *Rider* transcript levels is linked  
563 to changes in DNA methylation levels in *Rider* elements of RdDM mutants.  
564 There was no significant change in global DNA methylation in the three  
565 sequence contexts in the 71 *de novo* annotated *Rider* elements (Figure S3C),  
566 despite a tendency for young *Rider* elements to lose CHH in *slnrpd1* and  
567 *slnrpe1* (Figure S3D). Thus, the RdDM pathway affects the levels of *Rider*  
568 transcripts but there was no direct link to DNA methylation levels.

569

### 570 **Extrachromosomal circular DNA of *Rider* accumulates during drought** 571 **stress and in *slnrpd1* and *slnrpe1* mutants**

572

573 The life cycle of LTR retrotransposons starts with transcription of the element,  
574 then the synthesis and maturation of accessory proteins including reverse  
575 transcriptase and integrase, reverse transcription, and the production of  
576 extrachromosomal linear (ecl) DNA that integrates into a new genomic  
577 location [72]. In addition, eclDNA can be a target of DNA repair and can be  
578 circularised by a non-homologous end-joining mechanism or homologous  
579 recombination between LTRs, resulting in extrachromosomal circular DNA  
580 (eccDNA) [73–76]. We searched for eccDNA to evaluate the consequences of  
581 increased *Rider* transcript accumulation due to drought stress or an impaired  
582 RdDM pathway on subsequent steps of the transposition cycle. After  
583 exonuclease-mediated elimination of linear dsDNA and circular ssDNA, *Rider*

584 eccDNA was amplified by sequence-specific inverse PCR (Figure 4A). *Rider*  
585 eccDNA was absent in plants grown in control conditions but was detected in  
586 plants subjected to drought stress (Figure 4A). Sanger sequencing of the  
587 inverse PCR products showed that the amplified eccDNA probably originates  
588 from the *Rider\_08\_3* copy, which has 98.2 % sequence homology of the 5'  
589 and 3' LTR sequences (Figure S4A). Residual sequence divergence may be  
590 due to genotypic differences between the reference genomic sequence and  
591 the genome of our experimental material. Analysis of CREs in the LTR of the  
592 eccDNA revealed the presence of all elements identified previously with the  
593 exception of a single nucleotide mutation located in the *CGCGBOXAT* box  
594 (Figure S4A). This suggests that while this CRE is not required for production  
595 of *Rider* eccDNA upon drought stress, presence of all other CREs including  
596 the two *MYBCORE* elements is likely to be necessary for its activation.

597 Examination by quantitative PCR of the accumulation of *Rider* DNA,  
598 which included extrachromosomal and integrated copies, in drought-stressed  
599 plants also revealed an increase in *Rider* copy number (Figure 4B).  
600 Importantly, *Rider* eccDNA was not detected in *sit* mutants subjected to  
601 drought stress (Figure 4A), suggesting that induced transcription of *Rider* by  
602 drought stress triggers production of extrachromosomal DNA and this  
603 response requires ABA biosynthesis.

604 We also examined the accumulation of *Rider* eccDNA in plants  
605 impaired in RdDM. Interestingly, *Rider* eccDNA was detected in *slnrpd1* and  
606 *slnrpe1* (Figure 4C) and increase in *Rider* DNA copy number was confirmed  
607 by qPCR (Figure 4D). The eccDNA forms differed between the mutants  
608 (Figure 4C). Sequencing of *Rider* eccDNA in *slnrpd1* showed a sequence  
609 identical to the *Rider* eccDNA of wild-type plants subjected to drought stress.  
610 Thus the *Rider\_08\_3* copy is probably the main contributor to eccDNA in  
611 drought and in *slnrpd1*. In contrast, eccDNA recovered from *slnrpe1* had a  
612 shorter LTR (287 bp) and the highest sequence similarity with *Rider\_07\_2*  
613 (89.2 %) (Figure S4B). Shortening of the LTR in this particular element is  
614 associated with the loss of the upstream *MYBCORE* as well as the  
615 *CGCGBOXAT* elements (Figure S4B). This suggests that in the absence of  
616 SINRPE1, presence of these CREs is facultative for eccDNA production  
617 originating from this copy. In contrast, the absence of eccDNA copies derived

618 from this element upon dehydration suggests that both *MYBCORE* elements  
619 are required for effective *Rider* activation upon drought stress.

620 We then asked whether DNA methylation and siRNA distribution at  
621 these particular *Rider* copies had changed in the mutants. DNA methylation at  
622 CHH sites was drastically reduced at *Rider\_08\_3* in *slnrpd1* (Figure 4E and  
623 Figure S4C) together with a complete loss of 24-nt siRNAs at this locus  
624 (Figure 4F and Figure S4D) but DNA methylation at *Rider\_07\_2* was not  
625 affected, despite the deficiency of SINRPD1 or SINRPE1 (Figure 4E and  
626 Figure S4C). Levels of 21-22-nt siRNAs in both mutants and 24-nt siRNA in  
627 *slnrpe1* were increased (Figure 4F and Figure S4E). Altogether, this suggests  
628 that different components of the RdDM pathway differ in their effects on the  
629 activity of individual members of the *Rider* retrotransposon family.

630

### 631 ***Rider* families in other plant species**

632

633 To examine the distribution of *Rider* retrotransposons in other plant  
634 species, we searched for *Rider*-related sequences across the genomes of  
635 further *Solanaceae* species, including wild tomatoes, potato (*Solanum*  
636 *tuberosum*), and pepper (*Capsicum annuum*). We used the *Rider* reference  
637 sequence [44] as the query against genome sequences of *Solanum arcanum*,  
638 *S. habrochaites*, *S. lycopersicum*, *S. pennellii*, *S. pimpinellifolium*, *S.*  
639 *tuberosum*, and *Capsicum annuum* (genome versions are listed in Materials  
640 and Methods). Two BLAST searches were performed, one using the entire  
641 *Rider* sequence as the query and the other using only the *Rider* LTR.  
642 Consistent with previous reports, *Rider-like* elements are present in wild  
643 relatives of tomato such as *S. arcanum*, *S. pennellii* and *S. habrochaites*;  
644 however, the homology levels and their lengths vary significantly between  
645 species (Figure 5A). While *S. arcanum* and *S. habrochaites* exhibit high peak  
646 densities at 55% and 61% homology, respectively, *S. pennellii* show a high  
647 peak density at 98% over the entire *Rider* reference sequence (Figure 5A).  
648 This suggests that the *S. arcanum* and *S. habrochaites* genomes harbour  
649 mostly *Rider-like* elements with relatively low sequence similarity, while *S.*  
650 *pennellii* retains full-length *Rider* elements.

651 To better visualize this situation, we aligned the BLAST hits to the  
652 reference *Rider* copy (Figure 5B). This confirmed that *Rider* elements in *S.*  
653 *pennellii* are indeed mostly full-length *Rider* homologs showing high density of  
654 hits throughout their lengths, while BLAST hits in the *S. arcanum* and *S.*  
655 *habrochaites* genomes showed only partial matches over the 4867 bp of the  
656 reference *Rider* sequence (Figure 5B). Unexpectedly, this approach failed to  
657 detect either full-length or truncated *Rider* homologs in the close relative of  
658 tomato, *S. pimpinellifolium*. Extension of the same approaches to the  
659 genomes of the evolutionary more distant *S. tuberosum* and *Capsicum*  
660 *annuum* failed to detect substantial *Rider* homologs (Figure 5A-B), confirming  
661 the absence of *Rider* in the potato and pepper genomes [44]. As a control, we  
662 also analysed *Arabidopsis thaliana*, since previous studies reported the  
663 presence of *Rider* homologs in this model plant [44]. Using the BLAST  
664 approach above, we repeated the results provided in [44] and found BLAST  
665 hits of high sequence homology to internal sequences of *Rider* in the  
666 *Arabidopsis thaliana* genome. However, we did not detect sequence  
667 homologies to *Rider* LTRs (Figure 5C-D). Motivated by this finding and the  
668 possibility that *Rider* homologs in other species may have highly divergent  
669 LTRs, we screened for *Rider* LTRs that would have been missed in the  
670 analysis shown in Figure 5A-B due to the use of the full-length sequence of  
671 *Rider* as the query. Using the *Rider* LTR as a query revealed that *S. pennellii*,  
672 *S. arcanum* and *S. habrochaites* retain intact *Rider* LTR homologs, but *S.*  
673 *pimpinellifolium* exhibits a high BLAST hit density exclusively at approximately  
674 60% homology. This suggests strong divergence of *Rider* LTRs in this species  
675 (Figure 5C-D). Overall, the results indicate intact *Rider* homologs in some  
676 *Solanaceae* species, whereas sequence similarities to *Rider* occur only within  
677 the coding area of the retrotransposons in more distant plants such as  
678 *Arabidopsis thaliana*. Therefore, LTRs, which include the *cis*-regulatory  
679 elements conferring stress-responsiveness, diverge markedly between  
680 species.

681 To address the specificity of this divergence in *Solanaceae* species, we  
682 examined whether the CREs enriched in *S. lycopersicum* (Figure 2A) are  
683 present in LTR sequences of the *Rider* elements in *S. pennellii*, *S. arcanum*,  
684 *S. habrochaites* and *S. pimpinellifolium* (Figure 5C). While the LTRs identified

685 in *S. pennellii*, *S. arcanum* and *S. habrochaites* retained all five previously  
686 identified CREs, more distant LTRs showed shortening of the U3 region  
687 associated with loss of the CGCG box (Figure S5 and Table S4). This was  
688 observed already in *S. pimpinellifolium*, where all identified *Rider* LTRs lacked  
689 part of the U3 region containing the CGCG box (Supplementary Figure 5).  
690 Thus, *Rider* distribution and associated features differ even between closely  
691 related *Solanaceae* species, correlated with the occurrence of a truncated U3  
692 region and family-wide loss of CREs.

693 Finally, to test the evolutionary conservation of *Rider* elements across  
694 the plant kingdom, we performed *Rider* BLAST searches against all 110 plant  
695 genomes available at the NCBI Reference Sequence (RefSeq) database  
696 ([www.ncbi.nlm.nih.gov/refseq](http://www.ncbi.nlm.nih.gov/refseq)). Using the entire *Rider* sequence as the query  
697 to measure the abundance of *Rider* homologs throughout these genomes, we  
698 found *Rider* homologs in 14 diverse plant species (Figure S6). This suggests  
699 that *Rider* in tomato did not originate by horizontal transfer from *Arabidopsis*  
700 as initially suggested [44], but rather that *Rider* was already present in the last  
701 common ancestor of these plant species and persisted or was subsequently  
702 eradicated from the genomes. The limited conservation of *Rider* LTR  
703 sequences in the same 14 species, revealed using the LTR sequence as the  
704 query, suggests that *Rider* LTRs are rapidly evolving and that drought-  
705 responsive CREs may be restricted to *Solanaceae* (Figure S7).

706

707

708 **DISCUSSION**

709

710 *High-resolution map of full-length Rider elements in the tomato genome*

711

712 Comprehensive analysis of individual LTR retrotransposon families in  
713 complex plant genomes has been facilitated and become more accurate with  
714 the increasing availability of high-quality genome assemblies. Here, we took  
715 advantage of the most recent tomato genome release (SL3.0) to characterize  
716 with improved resolution the high-copy-number *Rider* retrotransposon family.  
717 Although *Rider* activity has been causally linked to the emergence of  
718 important agronomic phenotypes in tomato, the triggers of *Rider* have  
719 remained elusive. Despite the relatively low proportion (approximately 20%) of  
720 euchromatic chromosomal regions in the tomato genome [31]), our *de novo*  
721 functional annotation of full-length *Rider* elements revealed preferential  
722 compartmentalization of recent *Rider* insertions within euchromatin compared  
723 to aged insertions. Mapping analyses further revealed that recent rather than  
724 aged *Rider* transposition events are more likely to modify the close vicinity of  
725 genes. However, *Rider* copies inserted into heterochromatin have been  
726 passively maintained for longer periods. This differs significantly from other  
727 retrotransposon families in tomato such as *Tnt1*, *ToRTL1* and *T135*, which  
728 show initial, preferential insertions into heterochromatic regions [77]. *TARE1*,  
729 a high-copy-number *Copia-like* element, is present predominantly in  
730 pericentromeric heterochromatin [78]. Another high-copy-number  
731 retrotransposon, *Jinling*, is also enriched in heterochromatic regions, making  
732 up about 2.5% of the tomato nuclear genome [79]. The *Rider* propensity to  
733 insert into gene-rich areas mirrors the insertional preferences of the *ONSEN*  
734 family in Arabidopsis. Since new *ONSEN* insertions confer heat-  
735 responsiveness to neighbouring genes [28,29], it is tempting to speculate that  
736 genes in the vicinity of new *Rider* insertions may acquire, at least transiently,  
737 drought-responsiveness.

738

739

740

741

742 *Environmental and epigenetic regulation of Rider activity*

743

744 We found that *Rider* transcript levels are elevated during dehydration stress  
745 mediated by ABA-dependent signalling. The activation of retrotransposons  
746 upon environmental cues has been shown extensively to rely on the presence  
747 of *cis*-regulatory elements within the retrotransposon LTRs [60]. The heat-  
748 responsiveness of *ONSEN* in *Arabidopsis* [26,27,80], *Go-on* in rice [25], and  
749 *Copia* in *Drosophila* [81] is conferred by the presence in their LTRs of  
750 consensus sequences found in the promoters of heat-shock responsive  
751 genes. Thus, the host's heat-stress signalling appears to induce  
752 transcriptional activation of the transposon and promote transposition [80].  
753 While *ONSEN* and *Go-on* are transcriptionally inert in the absence of a  
754 triggering stress, transcripts of *Drosophila Copia* are found in control  
755 conditions, resembling the regulatory situation in *Rider*. Due to relatively high  
756 constitutive expression, increase in transcript levels of *Drosophila Copia*  
757 following stress appears modest compared to *ONSEN* or *Go-on*, which are  
758 virtually silent in control conditions [25–27,80]. Regulation of *Drosophila Copia*  
759 mirrors that of *Rider*, where transcript levels during dehydration stress are  
760 very high but the relative increase compared to control conditions is rather  
761 modest.

762 The presence of MYB recognition sequences within *Rider* LTRs  
763 suggests that MYB transcription factors participate in transcriptional activation  
764 of *Rider* during dehydration. Multiple MYB subfamilies are involved in ABA-  
765 dependent stress responses in tomato, but strong enrichment of the MYB  
766 core element CTGTTA within *Rider* LTRs suggests involvement of R2R3-MYB  
767 transcription factors, which are markedly amplified in *Solanaceae* [82].  
768 Members of this MYB subfamily are involved in the ABA signalling-mediated  
769 drought-stress response [83] and salt-stress signalling [84]. This possible  
770 involvement of R2R3-MYBs in *Rider* is reminiscent of the transcriptional  
771 activation of the tobacco retrotransposon *Tto1* by the R2R3-MYB, member  
772 NtMYB2 [85].

773 In addition to environmental triggers, *Rider* transcript levels are  
774 regulated by the RdDM pathway. Depletion of SINRPD1 and SINRPE1  
775 increases *Rider* transcript abundance, resulting in production of



776 extrachromosomal circular DNA. Analysis of *Rider*-specific siRNA populations  
777 revealed that siRNA targeting of *Rider* elements is mostly independent of their  
778 genomic location and chromatin context. This is somewhat unexpected since  
779 RdDM activity in tomato seems to be restricted to gene-rich euchromatin and  
780 it was postulated that accessibility of RNA Pol IV to heterochromatin is  
781 hindered by the compact chromatin structure [47,86,87]. We found that  
782 virtually all *Rider* copies are RdDM targets, which potentially influences local  
783 epigenetic features. Loss of SINRPD1 and SINRPE1 leads to over-  
784 accumulation of 21-22-nt siRNAs at *Rider* copies, suggesting that inactivation  
785 of canonical RdDM pathway-dependent transcriptional gene silencing triggers  
786 the activity of the non-canonical RDR6 RdDM pathway at *Rider* [88–90].

787 It is noteworthy that, despite clear effects on *Rider* transcript  
788 accumulation and siRNA accumulation, loss of SINRPD1 and SINRPE1 is not  
789 manifested by drastic changes in DNA methylation levels of *Rider* at the  
790 family level. Only young euchromatic *Rider* elements marginally lose CHH  
791 methylation in the *slnrpd1* mutant, but this is modest compared to the general  
792 decrease in mCHH observed throughout the chromosome arms [47]. As  
793 expected, CHH methylation at heterochromatic *Rider* is not affected. This  
794 suggests that SICMT2 is involved in maintenance of mCHH at  
795 heterochromatic *Rider* copies in the absence of SINRPD1, as observed  
796 previously for pericentromeric heterochromatin [47]. In general, our  
797 observations suggest that epigenetic silencing of *Rider* retrotransposons is  
798 particularly robust and involves compensatory pathways.

799 We identified extrachromosomal circular DNA originating from the  
800 *Rider* copies *Rider\_08\_3* and *Rider\_07\_2* in *slnrpd1* and *slnrpe1*,  
801 respectively. In terms of DNA methylation and siRNA distribution at these two  
802 specific copies, loss of SINRPD1 and SINRPE1 brought different copy-specific  
803 outcomes. *Rider\_08\_3*, the main contributor to eccDNA in *slnrpd1*, displayed  
804 a reduction in CHH methylation that may contribute to increased transcription  
805 and the accumulation of eccDNA. In *Rider\_07\_2*, that provides a template for  
806 eccDNA in *slnrpe1*, there was no change in DNA methylation levels.  
807 Therefore, transcription and the production of eccDNA from this *Rider* copy is  
808 not regulated by DNA methylation. Consequently, eccDNA from *Rider\_07\_2*  
809 was not detected in *slnrpd1* despite drastic loss of CHH methylation.

810 Altogether, it appears that transcriptional control and reverse transcription of  
811 *Rider* copies occurs via multiple layers of regulation, possibly specific for  
812 individual *Rider* elements according to age, sequence or genomic location,  
813 that are targeted by parallel silencing pathways, including non-canonical  
814 RdDM [91,92].

815

#### 816 *Rider retrotransposons in other plant species*

817

818 The presence of *Rider* in tomato relatives as well as in more distantly related  
819 plant species has been described previously [33,44,46]. However, the *de*  
820 *novo* identification of *Rider* elements in the sampling provided here shows the  
821 distribution of the *Rider* family within plant species to be more complex than  
822 initially suggested. Surprisingly, mining for sequences with high similarity,  
823 overlapping more than 85% of the entire reference sequence of *Rider*,  
824 detected no full-length *Rider* elements in *Solanum pimpinellifolium* but in all  
825 other wild tomato species tested. Furthermore, the significant accumulation of  
826 only partial *Rider* copies in *Solanum pimpinellifolium*, the closest relative of  
827 tomato, does not match the established phylogeny of the *Solanaceae*. The  
828 cause of these patterns is unresolved but two scenarios can be envisaged.  
829 First, the absence of full-length *Rider* elements may be due to the suboptimal  
830 quality of genome assembly that may exclude a significant proportion of highly  
831 repetitive sequences such as *Rider*. This is supported by the N50 values  
832 within the *Solanaceae*, where the quality of genome assemblies varies  
833 significantly between species, with *S. pimpinellifolium* showing the lowest  
834 (Table S7). An improved genome assembly would allow a refined analysis of  
835 *Rider* in this species. Alternatively, active *Rider* copies may have been lost in  
836 *S. pimpinellifolium* since the separation from the last common ancestor but  
837 not in the *S. lycopersicum* and *S. pennellii* lineages. The high-density of solo-  
838 LTRs and truncated elements in *S. pimpinellifolium* is in agreement with this  
839 hypothesis.

840 Comparing the sequences of *Rider* LTRs in the five tomato species,  
841 the unique occurrence of LTRs lacking most of the U3 region in *S.*  
842 *pimpinellifolium* suggests that loss of important regulatory sequences has  
843 impeded maintenance of intact *Rider* elements. Interestingly, part of the U3

844 region missing in *S. pimpinellifolium* contains the CGCG box, which is  
845 involved in response to environmental signals [61], as well as a short CpG-  
846 island-like structure (position 52-155 bp on reference *Rider*). CpG islands are  
847 usually enriched 5' of transcriptionally active genes in vertebrates [93] and  
848 plants [94]. Despite the presence of truncated *Rider* LTRs, the occurrence of  
849 intact, full-length LTRs in other wild tomato species indicates that *Rider* is still  
850 potentially active in these genomes.

851           Altogether, our findings suggest that inter- and intra-species TE  
852 distribution can be uncoupled and that the evolution of TE families in present  
853 crop plants was more complex than initially anticipated. Finally, we have  
854 opened interesting perspectives for harnessing transposon activities in crop  
855 breeding. Potentially active TE families that react to environmental stimuli,  
856 such as *Rider*, provide an unprecedented opportunity to generate genetic and  
857 epigenetic variation from which desirable agronomical traits may emerge.  
858 Notably, rewiring of gene expression networks regulating the drought-stress  
859 responses of new *Rider* insertions is an interesting strategy to engineer  
860 drought-resilient crops.

861

862 **Acknowledgments**

863

864 **Funding**

865

866 This work was supported by the European Research Council (EVOBREED,  
867 No. 322621) and the Gatsby Charitable Foundation (Fellowship  
868 AT3273/GLE).

869

870 **Disclosure Declaration**

871

872 The authors declare no competing interests.

873

874 **Author contribution**

875

876 MB and JP designed the study; MB performed experiments; MB, HGD and  
877 MC performed genomic data analyses; QG, SLG and DCB provided  
878 unpublished material and data; MB and JP wrote the paper with contributions  
879 from HGD and MC. All authors read and approved the final manuscript.

880

881 The authors thank all members of Dr. Paszkowski lab for fruitful discussions  
882 during the development of this project as well as the SLCU support staff.

883

884

885 **REFERENCES**

886

- 887 1. Lisch D (2013) How important are transposons for plant evolution? *Nat*  
888 *Rev Genet* **14**: 49–61.
- 889 2. Lisch D (2009) Epigenetic Regulation of Transposable Elements in  
890 Plants. *Annu Rev Plant Biol* **60**: 43–66.
- 891 3. Slotkin RK, Martienssen R (2007) Transposable elements and the  
892 epigenetic regulation of the genome. *Nat Rev Genet* **8**: 272–285.
- 893 4. Zhang H, Zhu J-K (2011) RNA-directed DNA methylation. *Curr Opin*  
894 *Plant Biol* **14**: 142–147.
- 895 5. Rigal M, Mathieu O (2011) A ‘mille-feuille’ of silencing: Epigenetic

- 896 control of transposable elements. *Biochim Biophys Acta - Gene Regul*  
897 *Mech* **1809**: 452–458.
- 898 6. Law JA, Jacobsen SE (2010) Establishing, maintaining and modifying  
899 DNA methylation patterns in plants and animals. *Nat Rev Genet* **11**:  
900 204–220.
- 901 7. Matzke M, Kanno T, Huettel B, Daxinger L, Matzke AJM (2007) Targets  
902 of RNA-directed DNA methylation. *Curr Opin Plant Biol* **10**: 512–519.
- 903 8. Wendte JM, Pikaard CS (2017) The RNAs of RNA-directed DNA  
904 methylation. *Biochim Biophys Acta* **1860**: 140–148.
- 905 9. Mirouze M, Reinders J, Bucher E, Nishimura T, Schneeberger K,  
906 Ossowski S, Cao J, Weigel D, Paszkowski J, Mathieu O (2009)  
907 Selective epigenetic control of retrotransposition in Arabidopsis. *Nature*  
908 **461**: 1–5.
- 909 10. Kato M, Miura A, Bender J, Jacobsen SE, Kakutani T (2003) Role of CG  
910 and non-CG methylation in immobilization of transposons in  
911 Arabidopsis. *Curr Biol* **13**: 421–426.
- 912 11. Lanciano S, Carpentier MC, Llauro C, Jobet E, Robakowska-Hyzorek D,  
913 Lasserre E, Ghesquière A, Panaud O, Mirouze M (2017) Sequencing  
914 the extrachromosomal circular mobilome reveals retrotransposon  
915 activity in plants. *PLoS Genet* **13**: 1–20.
- 916 12. Hu L, Li N, Xu C, Zhong S, Lin X, Yang J, Zhou T, Yuliang A, Wu Y,  
917 Chen Y-R, et al. (2014) Mutation of a major CG methylase in rice  
918 causes genome-wide hypomethylation, dysregulated genome  
919 expression, and seedling lethality. *Proc Natl Acad Sci* **111**: 10642–  
920 10647.
- 921 13. Cheng C, Tarutani Y, Miyao A, Ito T, Yamazaki M, Sakai H, Fukai E,  
922 Hirochika H (2015) Loss of function mutations in the rice  
923 chromomethylase OsCMT3a cause a burst of transposition. *Plant J* **83**:  
924 1069–1081.
- 925 14. Miura A, Yonebayashi S, Watanabe K, Toyama T, Shimada H, Kakutani  
926 T (2001) Mobilization of transposons by a mutation abolishing full DNA  
927 methylation in Arabidopsis. *Nature* **411**: 212–214.
- 928 15. Lippman Z, Gendrel A-V, Black M, Vaughn MW, Dedhia N, McCombie  
929 WR, Lavine K, Mittal V, May B, Kasschau KD, et al. (2004) Role of

- 930 transposable elements in heterochromatin and epigenetic control.  
931 *Nature* **430**: 471–476.
- 932 16. Tsukahara S, Kobayashi A, Kawabe A, Mathieu O, Miura A, Kakutani T  
933 (2009) Bursts of retrotransposition reproduced in Arabidopsis. *Nature*  
934 **461**: 423–426.
- 935 17. Griffiths J, Catoni M, Iwasaki M, Paszkowski J (2018) Sequence-  
936 Independent Identification of Active LTR Retrotransposons in  
937 Arabidopsis. *Mol Plant* **11**: 508–511.
- 938 18. Tan F, Zhou C, Zhou Q, Zhou S, Yang W, Zhao Y, Li G, Zhou D-X  
939 (2016) Analysis of Chromatin Regulators Reveals Specific Features of  
940 Rice DNA Methylation Pathways. *Plant Physiol* **171**: 2041–2054.
- 941 19. Chuong EB, Elde NC, Feschotte C (2017) Regulatory activities of  
942 transposable elements: from conflicts to benefits. *Nat Rev Genet* **18**:  
943 71–86.
- 944 20. McClintock B (1951) Chromosome Organization and Genic Expression.  
945 *Cold Spring Harb Symp Quant Biol* **16**: 13–47.
- 946 21. Grandbastien MA (1998) Activation of plant retrotransposons under  
947 stress conditions. *Trends Plant Sci* **3**: 181–187.
- 948 22. Grandbastien MA, Audeon C, Bonnivard E, Casacuberta JM, Chalhoub  
949 B, Costa APP, Le QH, Melayah D, Petit M, Poncet C, et al. (2005)  
950 Stress activation and genomic impact of Tnt1 retrotransposons in  
951 Solanaceae. *Cytogenet Genome Res* **110**: 229–241.
- 952 23. Butelli E, Licciardello C, Zhang Y, Liu J, Mackay S, Bailey P, Reforgiato-  
953 Recupero G, Martin C (2012) Retrotransposons Control Fruit-Specific,  
954 Cold-Dependent Accumulation of Anthocyanins in Blood Oranges. *Plant*  
955 *Cell* **24**: 1242–1255.
- 956 24. Johns M a, Mottinger J, Freeling M (1985) A low copy number, copia-  
957 like transposon in maize. *EMBO J* **4**: 1093–1101.
- 958 25. Cho J, Benoit M, Catoni M, Drost H-G, Brestovitsky A, Oosterbeek M,  
959 Paszkowski J (2019) Sensitive detection of pre-integration  
960 intermediates of long terminal repeat retrotransposons in crop plants.  
961 *Nat. Plants* **5**: 26-33.
- 962 26. Tittel-Elmer M, Bucher E, Broger L, Mathieu O, Paszkowski J, Vaillant I  
963 (2010) Stress-Induced Activation of Heterochromatic Transcription.

- 964 *PLoS Genet* **6**: e1001175.
- 965 27. Pecinka A, Dinh HQ, Baubec T, Rosa M, Lettner N, Scheid OM (2010)  
966 Epigenetic Regulation of Repetitive Elements Is Attenuated by  
967 Prolonged Heat Stress in *Arabidopsis*. *Plant Cell* **22**: 3118–3129.
- 968 28. Ito H, Gaubert H, Bucher E, Mirouze M, Vaillant I, Paszkowski J (2011)  
969 An siRNA pathway prevents transgenerational retrotransposition in  
970 plants subjected to stress. *Nature* **472**: 115–119.
- 971 29. Gaubert H, Sanchez DH, Drost H-G, Paszkowski J (2017)  
972 Developmental Restriction of Retrotransposition Activated in  
973 *Arabidopsis* by Environmental Stress. *Genetics* **207**: 813–821.
- 974 30. Tenaillon MI, Hollister JD, Gaut BS (2010) A triptych of the evolution of  
975 plant transposable elements. *Trends Plant Sci* **15**: 471–478.
- 976 31. Sato S, Tabata S, Hirakawa H, Asamizu E, Shirasawa K, Isobe S,  
977 Kaneko T, Nakamura Y, Shibata D, Aoki K, et al. (2012) The tomato  
978 genome sequence provides insights into fleshy fruit evolution. *Nature*  
979 **485**: 635–641.
- 980 32. Xiao H, Jiang N, Schaffner E, Stockinger EJ, van der Knaap E (2008) A  
981 Retrotransposon-Mediated Gene Duplication Underlies Morphological  
982 Variation of Tomato Fruit. *Science (80- )* **319**: 1527–1530.
- 983 33. Jiang N, Gao D, Xiao H, van der Knaap E (2009) Genome organization  
984 of the tomato sun locus and characterization of the unusual  
985 retrotransposon Rider. *Plant J* **60**: 181–193.
- 986 34. Rodríguez GR, Muñoz S, Anderson C, Sim S-C, Michel A, Causse M,  
987 Gardener BBM, Francis D, van der Knaap E (2011) Distribution of SUN,  
988 OVATE, LC, and FAS in the tomato germplasm and the relationship to  
989 fruit shape diversity. *Plant Physiol* **156**: 275–285.
- 990 35. Reynard GB (1961) New source of the j2 gene governing Jointless  
991 pedicel in tomato. *Science (80- )* **134**: 2102.
- 992 36. Rick CM (1956) A new jointless gene from the Galapagos L.  
993 pimpinellifolium. *TGC Rep* 23.
- 994 37. Rick CM (1956) Genetic and Systematic Studies on Accessions of  
995 *Lycopersicon* from the Galapagos Islands. *Am J Bot* **43**: 687.
- 996 38. Soyk S, Lemmon ZH, Oved M, Fisher J, Liberatore KL, Park SJ, Goren  
997 A, Jiang K, Ramos A, van der Knaap E, et al. (2017) Bypassing

- 998 Negative Epistasis on Yield in Tomato Imposed by a Domestication  
999 Gene. *Cell* **169**: 1142–1155.e12.
- 1000 39. Fray RG, Grierson D (1993) Identification and genetic analysis of  
1001 normal and mutant phytoene synthase genes of tomato by sequencing,  
1002 complementation and co-suppression. *Plant Mol Biol* **22**: 589–602.
- 1003 40. Jiang N, Visa S, Wu S, Knaap E Van Der (2012) *Rider Transposon*  
1004 *Insertion and Phenotypic Change in Tomato*. Springer Berlin  
1005 Heidelberg, Berlin, Heidelberg.
- 1006 41. Busch BL, Schmitz G, Rossmann S, Piron F, Ding J, Bendahmane A,  
1007 Theres K (2011) Shoot Branching and Leaf Dissection in Tomato Are  
1008 Regulated by Homologous Gene Modules. *Plant Cell* **23**: 3595–3609.
- 1009 42. Brown JC, Chaney RL, Ambler JE (1971) A New Tomato Mutant  
1010 Inefficient in the Transport of Iron. *Physiol Plant* **25**: 48–53.
- 1011 43. Ling H-Q, Bauer P, Bereczky Z, Keller B, Ganai M (2002) The tomato  
1012 fer gene encoding a bHLH protein controls iron-uptake responses in  
1013 roots. *Proc Natl Acad Sci U S A* **99**: 13938–13943.
- 1014 44. Cheng X, Zhang D, Cheng Z, Keller B, Ling H-Q (2009) A New Family  
1015 of Ty1-copia-Like Retrotransposons Originated in the Tomato Genome  
1016 by a Recent Horizontal Transfer Event. *Genetics* **181**: 1183–1193.
- 1017 45. Wang Y, Diehl A, Wu F, Vrebalov J, Giovannoni J, Siepel A, Tanksley  
1018 SD (2008) Sequencing and comparative analysis of a conserved  
1019 syntenic segment in the Solanaceae. *Genetics* **180**: 391–408.
- 1020 46. Gilbert C, Feschotte C (2018) Horizontal acquisition of transposable  
1021 elements and viral sequences: patterns and consequences. *Curr Opin*  
1022 *Genet Dev* **49**: 15–24.
- 1023 47. Gouil Q, Baulcombe DC (2016) DNA Methylation Signatures of the  
1024 Plant Chromomethyltransferases. *PLoS Genet* **12**: 1–17.
- 1025 48. Tanksley SD, Ganai MW, Prince JP, De Vicente MC, Bonierbale MW,  
1026 Broun P, Fulton TM, Giovannoni JJ, Grandillo S, Martin GB, et al.  
1027 (1992) High density molecular linkage maps of the tomato and potato  
1028 genomes. *Genetics* **132**: 1141–1160.
- 1029 49. Catoni M, Griffiths J, Becker C, Zabet NR, Bayon C, Dapp M,  
1030 Lieberman□Lazarovich M, Weigel D, Paszkowski J (2017) DNA  
1031 sequence properties that predict susceptibility to epiallelic switching.



- 1032 *EMBO J* **36**: 617–628.
- 1033 50. Catoni M, Tsang JM, Greco AP, Zabet NR (2018) DMRcaller: a versatile  
1034 R/Bioconductor package for detection and visualization of differentially  
1035 methylated regions in CpG and non-CpG contexts. *Nucleic Acids Res*  
1036 1–11.
- 1037 51. Lawrence M, Huber W, Pagès H, Aboyoun P, Carlson M, Gentleman R,  
1038 Morgan MT, Carey VJ (2013) Software for Computing and Annotating  
1039 Genomic Ranges. *PLoS Comput Biol* **9**: 1–10.
- 1040 52. Pruitt KD, Tatusova T, Maglott DR (2007) NCBI reference sequences  
1041 (RefSeq): a curated non-redundant sequence database of genomes,  
1042 transcripts and proteins. *Nucleic Acids Res* **35**: D61-5.
- 1043 53. Drost H-G, Paszkowski J (2017) Biomart: genomic data retrieval with  
1044 R. *Bioinformatics* **33**: 1216–1217.
- 1045 54. Fernandez-Pozo N, Menda N, Edwards JD, Saha S, Tecle IY, Strickler  
1046 SR, Bombarely A, Fisher-York T, Pujar A, Foerster H, et al. (2015) The  
1047 Sol Genomics Network (SGN)—from genotype to phenotype to  
1048 breeding. *Nucleic Acids Res* **43**: D1036–D1041.
- 1049 55. Lowe TM, Eddy SR (1996) TRNAscan-SE: A program for improved  
1050 detection of transfer RNA genes in genomic sequence. *Nucleic Acids*  
1051 *Res* **25**: 955–964.
- 1052 56. Michaud M, Cognat V, Duchêne AM, Maréchal-Drouard L (2011) A  
1053 global picture of tRNA genes in plant genomes. *Plant J* **66**: 80–93.
- 1054 57. Finn RD, Coggill P, Eberhardt RY, Eddy SR, Mistry J, Mitchell AL,  
1055 Potter SC, Punta M, Qureshi M, Sangrador-Vegas A, et al. (2016) The  
1056 Pfam protein families database: towards a more sustainable future.  
1057 *Nucleic Acids Res* **44**: D279–D285.
- 1058 58. Rognes T, Flouri T, Nichols B, Quince C, Mahé F (2016) VSEARCH: a  
1059 versatile open source tool for metagenomics. *PeerJ* **4**: e2584.
- 1060 59. Altschul SF, Gish W, Miller W, Myers EW, Lipman DJ (1990) Basic local  
1061 alignment search tool. *J Mol Biol* **215**: 403–410.
- 1062 60. Galindo-González L, Mhiri C, Deyholos MK, Grandbastien MA (2017)  
1063 LTR-retrotransposons in plants: Engines of evolution. *Gene* **626**: 14–25.
- 1064 61. Yang T, Poovaiah BW (2002) A calmodulin-binding/CGCG box DNA-  
1065 binding protein family involved in multiple signaling pathways in plants.

- 1066 *J Biol Chem* **277**: 45049–45058.
- 1067 62. Abe H, Urao T, Ito T, Seki M, Shinozaki K, Yamaguchi-Shinozaki K  
1068 (2003) Arabidopsis AtMYC2 (bHLH) and AtMYB2 (MYB) function as  
1069 transcriptional activators in abscisic acid signaling. *Plant Cell* **15**: 63–78.
- 1070 63. Yang A, Dai X, Zhang W-H (2012) A R2R3-type MYB gene, OsMYB2, is  
1071 involved in salt, cold, and dehydration tolerance in rice. *J Exp Bot* **63**:  
1072 2541–2556.
- 1073 64. Gómez-Porrás JL, Riaño-Pachón D, Dreyer I, Mayer JE, Mueller-  
1074 Roeber B (2007) Genome-wide analysis of ABA-responsive elements  
1075 ABRE and CE3 reveals divergent patterns in Arabidopsis and rice. *BMC*  
1076 *Genomics* **8**: 260.
- 1077 65. Timmerhaus G, Hanke ST, Buchta K, Rensing SA (2011) Prediction and  
1078 validation of promoters involved in the abscisic acid response in  
1079 *Physcomitrella patens*. *Mol Plant* **4**: 713–729.
- 1080 66. Vishwakarma K, Upadhyay N, Kumar N, Yadav G, Singh J, Mishra RK,  
1081 Kumar V, Verma R, Upadhyay RG, Pandey M, et al. (2017) Abscisic  
1082 Acid Signaling and Abiotic Stress Tolerance in Plants: A Review on  
1083 Current Knowledge and Future Prospects. *Front Plant Sci* **08**: 1–12.
- 1084 67. Sagi M, Fluhr R, Lips SH (1999) Aldehyde oxidase and xanthine  
1085 dehydrogenase in a flacca tomato mutant with deficient abscisic acid  
1086 and wilted phenotype. *Plant Physiol* **120**: 571–578.
- 1087 68. Parry AD, Neill SJ, Horgan R (1988) Xanthoxin levels and metabolism  
1088 in the wild-type and wilted mutants of tomato. *Planta* **173**: 397–404.
- 1089 69. Burbidge A, Grieve TM, Jackson A, Thompson A, McCarty DR, Taylor IB  
1090 (1999) Characterization of the ABA-deficient tomato mutant *notabilis*  
1091 and its relationship with maize Vp14. *Plant J* **17**: 427–431.
- 1092 70. Harrison E, Burbidge A, Okyere JP, Thompson AJ, Taylor IB (2011)  
1093 Identification of the tomato ABA-deficient mutant *sitiens* as a member of  
1094 the ABA-aldehyde oxidase gene family using genetic and genomic  
1095 analysis. *Plant Growth Regul* **64**: 301–309.
- 1096 71. Maruyama KY, Todaka DA, Mizoi JU, Yoshida TA, Kidokoro SA,  
1097 Matsukura SA, Takasaki HI, Sakurai TE, Yamamoto YOY, Yoshiwara  
1098 KY (2012) Identification of Cis -Acting Promoter Elements in Cold- and  
1099 Dehydration- Induced Transcriptional Pathways in Arabidopsis , Rice ,

- 1100 and Soybean. *DNA Res* **19**: 37–49.
- 1101 72. Perlman PS, Boeke JD (2004) Ring around the retroelement. *Science*  
1102 **303**: 182–184.
- 1103 73. Kilzer JM, Stracker T, Beitzel B, Meek K, Weitzman M, Bushman FD  
1104 (2003) Roles of host cell factors in circularization of retroviral DNA.  
1105 *Virology* **314**: 460–467.
- 1106 74. Li L, Olvera JM, Yoder KE, Mitchell RS, Butler SL, Lieber M, Martin SL,  
1107 Bushman FD (2001) Role of the non-homologous DNA end joining  
1108 pathway in the early steps of retroviral infection. *EMBO J* **20**: 3272–  
1109 3281.
- 1110 75. Flavell AJ, Ish-Horowicz D (1981) Extrachromosomal circular copies of  
1111 the eukaryotic transposable element copia in cultured *Drosophila* cells.  
1112 *Nature* **292**: 591–595.
- 1113 76. Flavell AJ, Ish-horowicz D (1981) Extrachromosomal circular copies of  
1114 the eukaryotic transposable element copia in cultured *Drosophila* cells.  
1115 *Nature* **292**: 591–595.
- 1116 77. Tam SM, Causse M, Garchery C, Burck H, Mhiri C, Grandbastien M-A  
1117 (2007) The distribution of copia-type retrotransposons and the  
1118 evolutionary history of tomato and related wild species. *J Evol Biol* **20**:  
1119 1056–1072.
- 1120 78. Yin H, Liu J, Xu Y, Liu X, Zhang S, Ma J, Du J (2013) TARE1, a  
1121 Mutated Copia-Like LTR Retrotransposon Followed by Recent Massive  
1122 Amplification in Tomato. *PLoS One* **8**: e68587.
- 1123 79. Wang Y, Tang X, Cheng Z, Mueller L, Giovannoni J, Tanksley SD  
1124 (2006) Euchromatin and pericentromeric heterochromatin: comparative  
1125 composition in the tomato genome. *Genetics* **172**: 2529–2540.
- 1126 80. Cavrak V V., Lettner N, Jamge S, Kosarewicz A, Bayer LM, Mittelsten  
1127 Scheid O (2014) How a Retrotransposon Exploits the Plant's Heat  
1128 Stress Response for Its Activation. *PLoS Genet* **10**: e1004115.
- 1129 81. Strand DJ, Mcdonald JF (1985) Copia is transcriptionally responsive to  
1130 environmental stress. *Nucleic Acids Res* **13**: 4401–4410.
- 1131 82. Li Z, Peng R, Tian Y, Han H, Xu J, Yao Q (2016) Genome-Wide  
1132 Identification and Analysis of the MYB Transcription Factor Superfamily  
1133 in *Solanum lycopersicum*. *Plant Cell Physiol* **57**: 1657–1677.

- 1134 83. Seo PJ, Xiang F, Qiao M, Park J-Y, Lee YN, Kim S-G, Lee Y-H, Park  
1135 WJ, Park C-M (2009) The MYB96 transcription factor mediates abscisic  
1136 acid signaling during drought stress response in Arabidopsis. *Plant*  
1137 *Physiol* **151**: 275–289.
- 1138 84. Zhu N, Cheng S, Liu X, Du H, Dai M, Zhou D-X, Yang W, Zhao Y (2015)  
1139 The R2R3-type MYB gene OsMYB91 has a function in coordinating  
1140 plant growth and salt stress tolerance in rice. *Plant Sci* **236**: 146–156.
- 1141 85. Sugimoto K, Takeda S, Hirochika H (2000) MYB-related transcription  
1142 factor NtMYB2 induced by wounding and elicitors is a regulator of the  
1143 tobacco retrotransposon Tto1 and defense-related genes. *Plant Cell* **12**:  
1144 2511–2528.
- 1145 86. Corem S, Doron-Faigenboim A, Jouffroy O, Maumus F, Arazi T, Bouché  
1146 N (2018) Redistribution of CHH Methylation and Small Interfering RNAs  
1147 across the Genome of Tomato ddm1 Mutants. *Plant Cell* **30**:  
1148 tpc.00167.2018.
- 1149 87. Kravchik M, Damodharan S, Stav R, Arazi T (2014) Generation and  
1150 characterization of a tomato DCL3-silencing mutant. *Plant Sci* **221–222**:  
1151 81–89.
- 1152 88. Panda K, Ji L, Neumann DA, Daron J, Schmitz RJ, Slotkin RK (2016)  
1153 Full-length autonomous transposable elements are preferentially  
1154 targeted by expression-dependent forms of RNA-directed DNA  
1155 methylation. *Genome Biol* **17**: 170.
- 1156 89. McCue AD, Panda K, Nuthikattu S, Choudury SG, Thomas EN, Slotkin  
1157 RK (2015) ARGONAUTE 6 bridges transposable element mRNA-  
1158 derived siRNAs to the establishment of DNA methylation. *EMBO J* **34**:  
1159 20–35.
- 1160 90. Nuthikattu S, McCue AD, Panda K, Fultz D, DeFraia C, Thomas EN,  
1161 Slotkin RK (2013) The Initiation of Epigenetic Silencing of Active  
1162 Transposable Elements Is Triggered by RDR6 and 21-22 Nucleotide  
1163 Small Interfering RNAs. *Plant Physiol* **162**: 116–131.
- 1164 91. Cuerda-Gil D, Slotkin RK (2016) Non-canonical RNA-directed DNA  
1165 methylation. *Nat Plants* **2**: 16163.
- 1166 92. Matzke M a, Mosher R a (2014) RNA-directed DNA methylation: an  
1167 epigenetic pathway of increasing complexity. *Nat Rev Genet* **15**: 394–

- 1168            408.  
1169    93.    Deaton A, Bird A (2011) CpG islands and the regulation of transcription.  
1170            *Genes Dev* **25**: 1010–1022.  
1171    94.    Ashikawa I (2001) Gene-associated CpG islands in plants as revealed  
1172            by analyses of genomic sequences. *Plant J* **26**: 617–625.  
1173

1174 **FIGURE LEGENDS**

1175

1176

1177 **Figure 1: Chromosomal location and phylogenetic relationships of *de***

1178 ***novo* annotated full-length *Rider* elements**

1179

1180 (A) Chromosomal positions of 71 *de novo* annotated full-length *Rider*  
1181 elements in the SL3.0 genome. *Rider* copies are marked as coloured vertical  
1182 bars, with colours reflecting similarity between LTRs for each element. Dark  
1183 grey areas delimitate the centromeres, light grey pericentromeric  
1184 heterochromatin, and white euchromatin. (B) Phylogenetic relationship of the  
1185 71 *de novo* annotated *Rider* elements. The phylogenetic tree was constructed  
1186 using the neighbour-joining method on nucleotide sequences of each *Rider*  
1187 copy.

1188

1189 **Figure 2: *Rider* activation is stimulated by drought and ABA**

1190

1191 (A) Identification of *cis*-regulatory elements (CREs) within *Rider* LTRs. *Rider*  
1192 LTR U3, R and U5 regions are marked, as well as neighbouring Target Site  
1193 Duplication (TSD) and Primer Binding Site (PBS) sequences. CREs are  
1194 marked as coloured vertical bars; their bp positions are given in brackets. (B-  
1195 C) Quantification of *Rider* RNA levels by RT-qPCR in tomato seedlings after  
1196 (B) drought stress or (C) mannitol and NaCl treatments. Histograms show  
1197 normalized expression +/- SEM from two to three biological replicates.  
1198 \* $P < 0.05$ , Student's *t*-test. (D) Quantification of *Rider* RNA levels by RT-qPCR  
1199 in leaves of drought-stressed tomato wild-type plants, *flc*, *not* and *sit* mutants.  
1200 Histograms show normalized expression +/- SEM from two biological  
1201 replicates. \* $P < 0.05$  denotes difference compared to wild-type control; #  $P < 0.05$   
1202 denotes difference compared to wild-type drought plants, Student's *t*-test. (E)  
1203 Quantification of *Rider* RNA levels by RT-qPCR in tomato seedlings after ABA  
1204 treatment. Histograms show normalized expression +/- SEM from two to three  
1205 biological replicates. \* $P < 0.05$ , \*\*\* $P < 0.001$ , Student's *t*-test.

1206

1207

1208 **Figure 3: Accumulation of *Rider* transcripts in tomato plants deficient in**  
1209 **epigenetic regulation**

1210

1211 (A) Quantification of *Rider* RNA levels by RT-qPCR in tomato seedlings  
1212 treated with 5-azacytidine and/or ABA. Histograms show normalized  
1213 expression +/- SEM from two to three biological replicates. \* $P < 0.05$ , Student's  
1214 *t*-test.

1215 (B) Abundance of siRNAs at *Rider* elements in wild type, *slnrpd1* and *slnrpe1*.  
1216 Data are expressed as siRNA reads per kb per million mapped reads and  
1217 represent average normalized siRNA counts on *Rider* elements +/- SD from  
1218 71 *de novo* annotated *Rider* copies. \*\*\* $P < 0.001$ , Student's *t*-test. (C)

1219 Quantification of *Rider* RNA by RT-qPCR in *slnrpd1* and *slnrpe1* compared to  
1220 wild type. Histograms show normalized expression +/- SEM from two to four  
1221 biological replicates. \* $P < 0.05$ , Student's *t*-test.

1222

1223 **Figure 4: Accumulation of *Rider* extrachromosomal DNA in drought-**  
1224 **stressed plants and in *slnrpd1* and *slnrpe1* mutants**

1225

1226 (A) Assay by inverse PCR of *Rider* extrachromosomal circular DNA in  
1227 drought-stressed wild-type plants and stressed *sit* mutants. Primer localization  
1228 shown on the left (grey bar: *Rider* element, black box: LTR, arrowheads: PCR  
1229 primers). Upper gel: specific PCR amplification of *Rider* circles after DNase  
1230 treatment, lower gel: control PCR for *Rider* detection without DNase

1231 treatment. (B) Quantification of *Rider* DNA copy number, including both  
1232 chromosomal and extrachromosomal copies, by qPCR in leaves of tomato  
1233 plants subjected to drought-stress. Histograms show normalized expression  
1234 +/- SEM from two to three biological replicates. \* $P < 0.05$ , Student's *t*-test. (C)

1235 Assay by inverse PCR of *Rider* extrachromosomal circular DNA in *slnrpd1*  
1236 and *slnrpe1* leaves. Upper gel: PCR amplification of *Rider* circles after DNase  
1237 treatment, lower gel: control PCR for *Rider* detection without DNase

1238 treatment. (D) Quantification of *Rider* DNA copy number, including both  
1239 chromosomal and extrachromosomal copies, by qPCR in *slnrpd1* and *slnrpe1*  
1240 leaves. Histograms show normalized expression +/- SEM from two biological  
1241 replicates. \* $P < 0.05$ , Student's *t*-test. (E) Quantification of CHH DNA

1242 methylation levels at *Rider\_08\_3* and *Rider\_07\_2* in wild type, *slnrpd1* and  
1243 *slnrpe1*. Levels expressed as % of methylated CHH sites. (F) Normalized  
1244 siRNA count of 21-22-nt and 24-nt siRNAs at *Rider\_08\_3* and *Rider\_07\_2* in  
1245 wild type, *slnrpd1* and *slnrpe1*. Data are expressed as siRNA reads per kb per  
1246 million mapped reads.

1247

1248 **Figure 5: Distribution of *Rider* in other *Solanaceae* species**

1249

1250 (A) *In silico* identification of *Rider* elements in *Solanaceae* species based on  
1251 the density of high homology BLAST hits over the full-length reference *Rider*  
1252 sequence. (B) Alignment length of high homology BLAST hits obtained in (A).  
1253 (C) *In silico* identification of *Rider* elements in *Solanaceae* species based on  
1254 the density of high homology BLAST hits over the reference *Rider* LTR  
1255 sequence. (D) Alignment length of high homology BLAST hits obtained in (C).  
1256 Left panels (A) and (C): phylogenetic trees of the species examined.



1257 **TABLES**

1258

1259 **Table 1: Distribution of *de novo* annotated *Rider* elements based on**  
1260 **chromatin context**

1261

1262 **Table 2: Distribution of *de novo* annotated *Rider* elements based on**  
1263 **gene proximity**

1264

1265

1266 **SUPPLEMENTARY FIGURE LEGENDS**

1267

1268 **Figure S1: Distribution of 71 *de novo* annotated *Rider* elements based**  
1269 **on LTR similarity and chromatin context**

1270

1271 (A) Age distribution of total *Rider* elements based on LTR similarity and  
1272 corresponding classes. (B) Age distribution of *Rider* elements inserted in  
1273 heterochromatic (HC) and euchromatic (EC) regions based on LTR similarity.

1274

1275 **Figure S2: *Rider* transcripts levels are unaffected by cold stress**

1276

1277 (A-D) Quantification of *SIASR1* RNA levels by RT-qPCR in wild-type tomato  
1278 seedlings after (A) drought stress (B) mannitol, (C) NaCl or (D) ABA  
1279 treatments. (E) Quantification of *SIASR1* RNA levels in leaves of drought-  
1280 stressed tomato wild-type plants, *flc*, *not* and *sit* mutants. (F) Quantification of  
1281 *SIASR1* RNA levels by RT-qPCR in wild-type tomato seedlings after 5-  
1282 azacytidine and ABA treatments. (G) Quantification of *Rider* RNA levels by  
1283 RT-qPCR in wild-type tomato seedlings after cold stress. Histograms show  
1284 normalized expression +/- SEM from three to five biological replicates.

1285

1286 **Figure S3: Distribution of siRNAs and DNA methylation within *Rider***  
1287 **sub-groups**

1288

1289 (A) 21-22-nt and (B) 24-nt siRNAs normalized counts at distinct *Rider* sub-  
1290 groups in wild type, wild type with *CAS9*, *slnrpd1* and *slnrpe1*. *Rider* elements  
1291 are classified based on LTR similarity (80-95%, 95-98% and 98-100%), while  
1292 *Rider* (Euchromatin) denotes copies located on euchromatic arms and *Rider*  
1293 (Heterochromatin) copies located in pericentromeric heterochromatin. Data  
1294 are expressed as siRNA reads per kb per million mapped reads, and  
1295 represent average normalized siRNA counts on *Rider* elements +/- SD from  
1296 *Rider* copies in the sub-group. (C) Quantification of DNA methylation levels in  
1297 the CG, CHG and CHH contexts at *Rider* in wild type, *slnrpd1* and *slnrpe1*.  
1298 The levels are averages of DNA methylation (%) in each context over the 71  
1299 *de novo* annotated *Rider* copies. (D) Quantification of CHH DNA methylation

1300 levels at *Rider* sub-groups in wild type, *slnrpd1* and *slnrpe1*. The levels are  
1301 averages of DNA methylation (%) in the CHH context over *Rider* sub-groups.

1302

1303 **Figure S4: Distinct *Rider* copies contribute to the production of**  
1304 **extrachromosomal circular DNA**

1305

1306 Comparison of the LTR nucleotide sequence from *Rider* extrachromosomal  
1307 circular DNA detected after drought, or in *slnrpd1* (A) or *slnrpe1* (B), with the  
1308 reference *Rider* LTR using EMBOSS Needle  
1309 ([www.ebi.ac.uk/Tools/psa/emboss\\_needle/](http://www.ebi.ac.uk/Tools/psa/emboss_needle/)). CREs are marked as coloured  
1310 boxes. (C) Quantification of CHH DNA methylation levels at LTRs and body of  
1311 *Rider\_08\_3* and *Rider\_07\_2* in wild type, *slnrpd1* and *slnrpe1*. Levels  
1312 expressed as % of methylated CHH sites. (D-E) Normalized siRNA count of  
1313 24-nt (D) and 21-22-nt (E) siRNAs at LTRs and body of *Rider\_08\_3* and  
1314 *Rider\_07\_2* in wild type, *slnrpd1* and *slnrpe1*. Data are expressed as siRNA  
1315 reads per kb per million mapped reads.

1316

1317 **Figure S5: Characterization of *Rider* sub-populations in *Solanaceae***  
1318 **based on LTR sequences**

1319

1320 Coverage over reference *Rider* LTR of high homology sequences identified by  
1321 BLAST in Figure 5C. Sequences classified as “long LTR” were selected by  
1322 filtering for BLAST hits with alignment lengths between 350-450 bp and >50%  
1323 sequence and length homology to reference *Rider*. Sequences classified as  
1324 “short LTR” were selected by filtering for BLAST hits with alignment lengths  
1325 between 150-300 bp and >50% sequence and length homology to reference  
1326 *Rider*.

1327

1328 **Figure S6: Identification of *Rider* homologs in 14 plant species**

1329

1330 *In silico* identification of *Rider* homologs in 14 plant species based on the  
1331 density of high homology BLAST hits over the full-length reference *Rider*  
1332 sequence (left) and alignment length of BLAST hits obtained (right). Species

1333 are ordered by evolutionary distance to *Solanum lycopersicum* from  
1334 [www.timetree.org](http://www.timetree.org), [www.genome.jp](http://www.genome.jp) and Supplementary References.

1335

1336 **Figure S7: Non-*Solanaceae* *Rider* homologs lack LTR sequence**  
1337 **conservation**

1338

1339 *In silico* identification of *Rider* LTR homologs in 14 plant species based on the  
1340 density of high homology BLAST hits over the reference *Rider* LTR sequence  
1341 only. Species are ordered by evolutionary distance to *Solanum lycopersicum*  
1342 from [www.timetree.org](http://www.timetree.org), [www.genome.jp](http://www.genome.jp) and Supplementary References.

1343

1344 **SUPPLEMENTARY TABLES**

1345

1346 **Table S1: Primers used in this study**

1347

1348 **Table S2: List of the 110 plant species used for the large-scale *Rider***  
1349 **BLAST search**

1350

1351 **Table S3: Identification and enrichment analysis of *cis*-regulatory**  
1352 **elements in *Rider* LTRs**

1353

1354 **Table S4: Enrichment analysis of *cis*-regulatory elements in *Rider* LTRs**  
1355 **in four *Solanaceae* species**

1356

1357 **Table S5: *De novo* annotation of LTR retrotransposons in the SL3.0**  
1358 **genome by *LTRpred***

1359

1360 **Table S6: Patristic distances between 71 *de novo* annotated *Rider***  
1361 **copies**

1362

1363 **Table S7: N50 metric for six *Solanaceae* species**

1364

1365

1366 **SUPPLEMENTARY REFERENCES**

1367

1368 Harkess, A. *et al.* The asparagus genome sheds light on the origin and  
1369 evolution of a young y chromosome. *Nat. Commun.* **8**, (2017).

1370

1371 Zou, C. *et al.* A high-quality genome assembly of quinoa provides insights into  
1372 the molecular basis of salt bladder-based salinity tolerance and the  
1373 exceptional nutritional value. *Cell Res.* **27**, 1327–1340 (2017).

1374

a

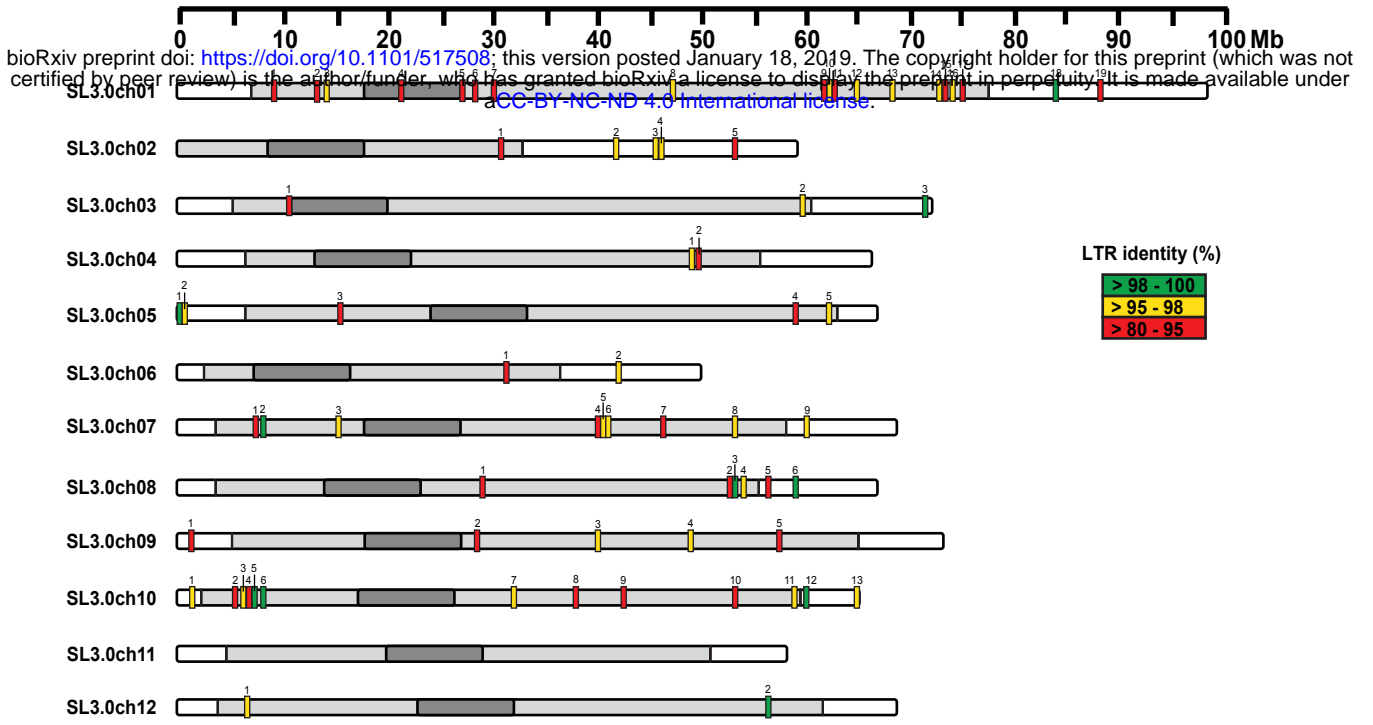

b

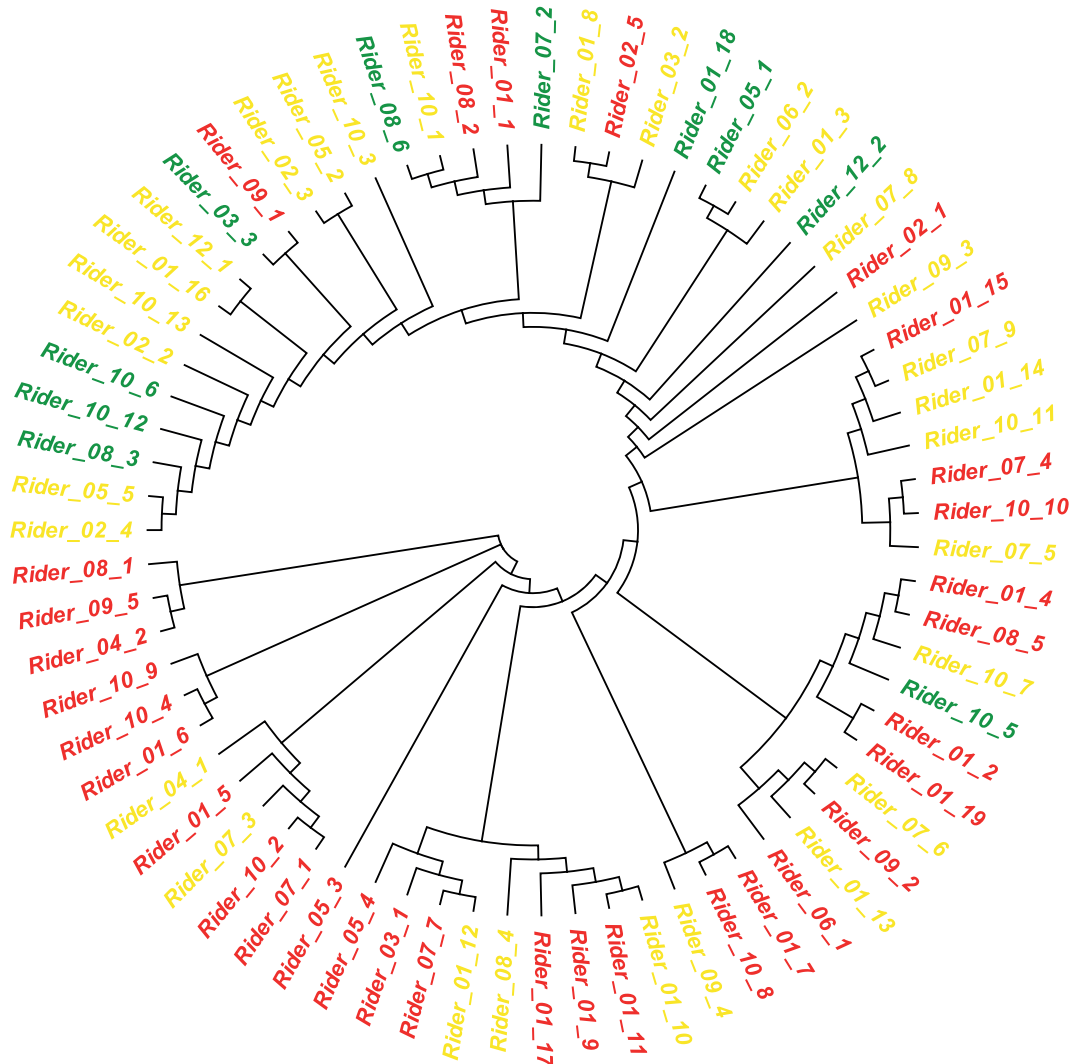

Figure 1

a

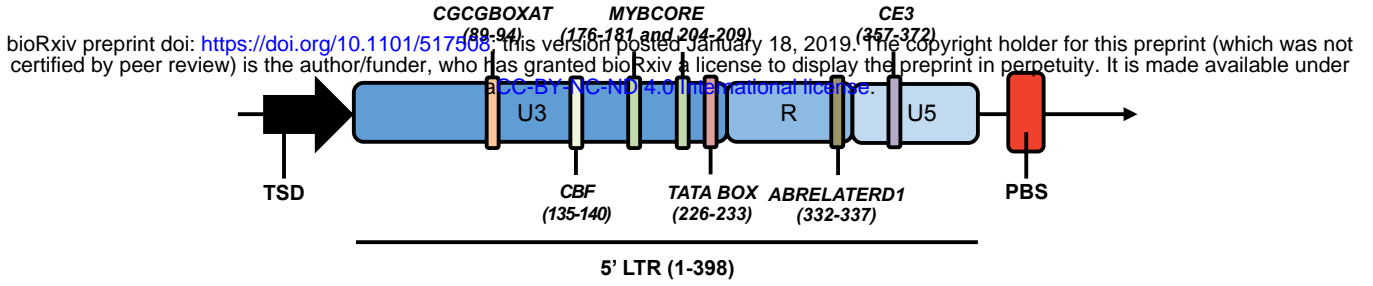

b

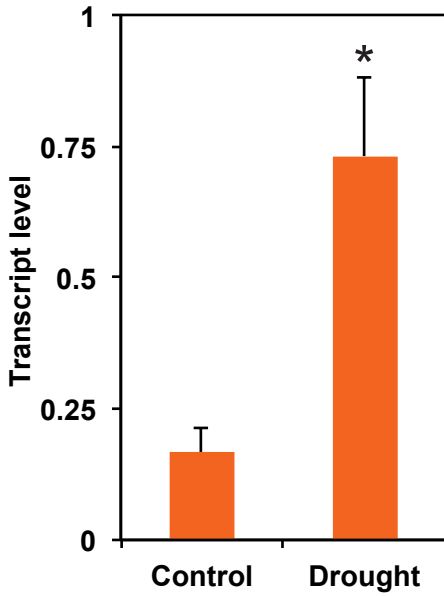

c

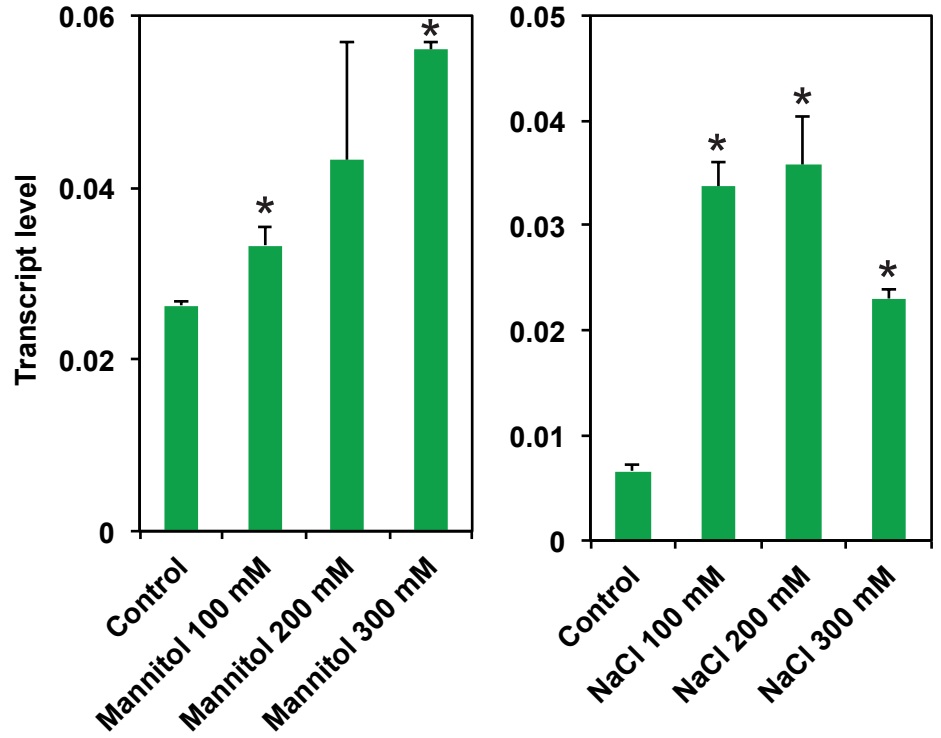

d

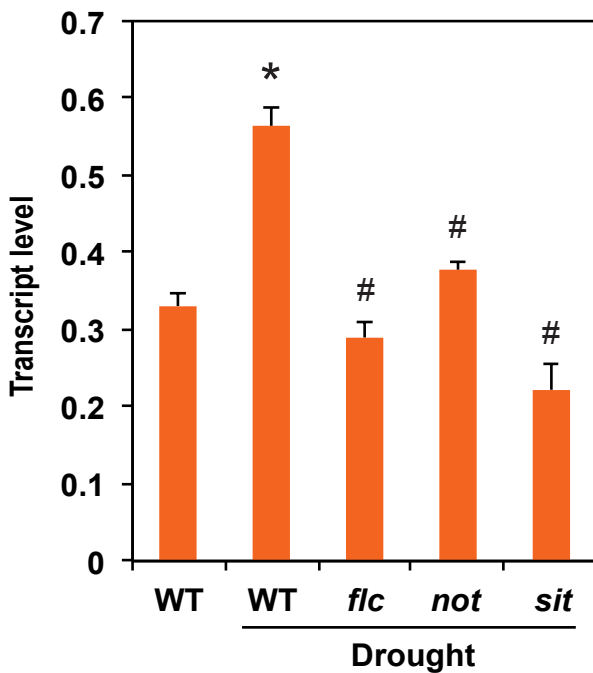

e

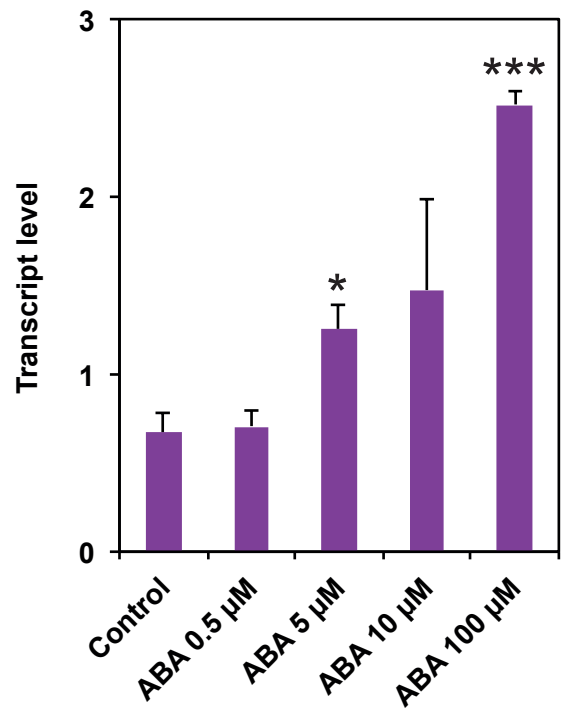

Figure 2



**a**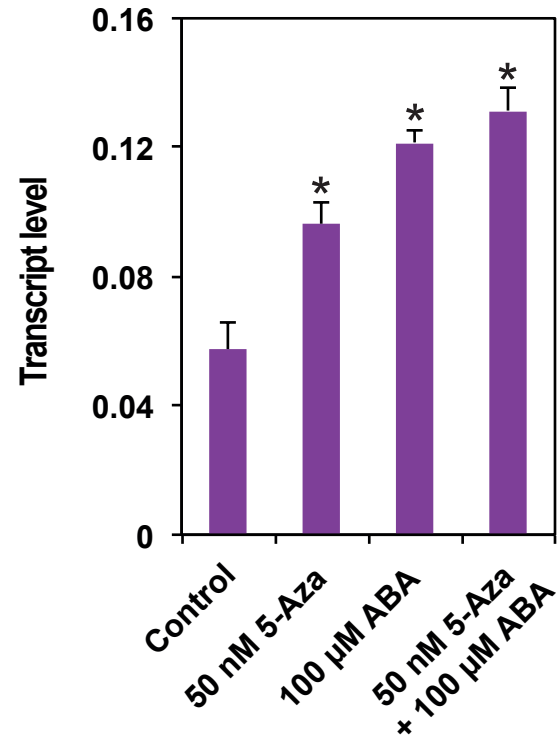**b**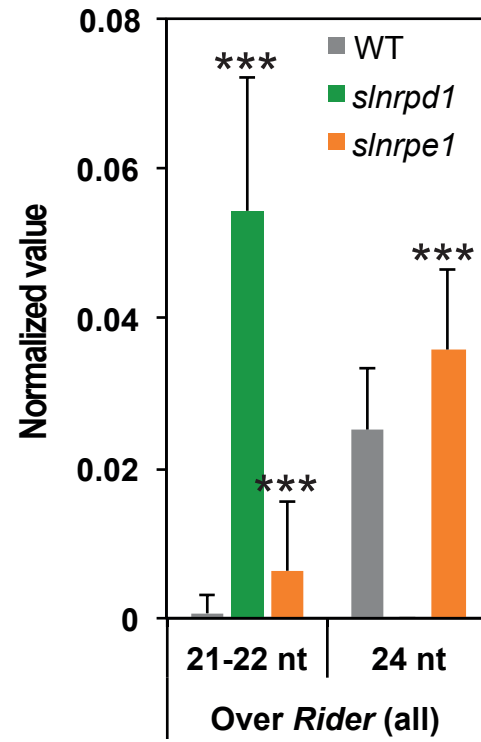**c**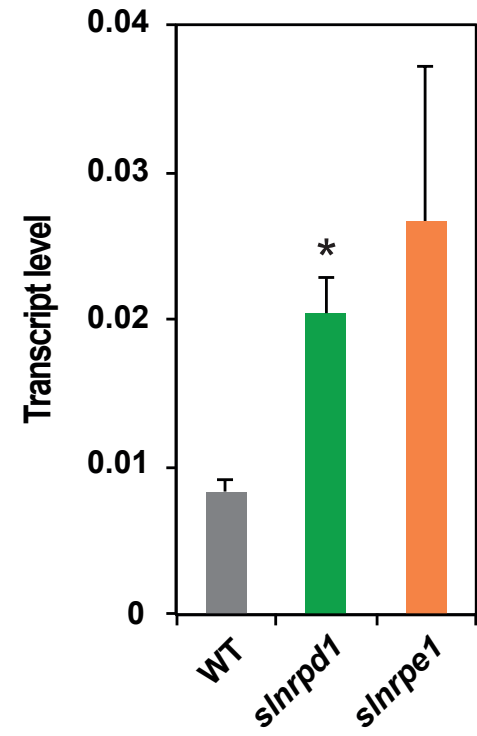**Figure 3**

a

bioRxiv preprint doi: <https://doi.org/10.1101/517508>; this version posted January 18, 2019. The copyright holder for this preprint (which was not certified by peer review) is the author/funder, who has granted bioRxiv a license to display the preprint in perpetuity. It is made available under aCC-BY-NC-ND 4.0 International license.

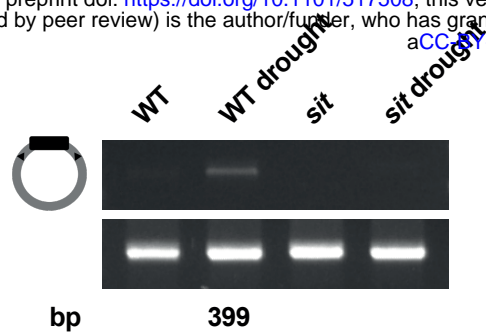

c

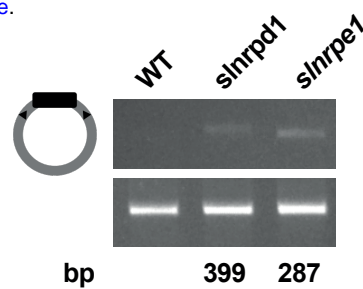

b

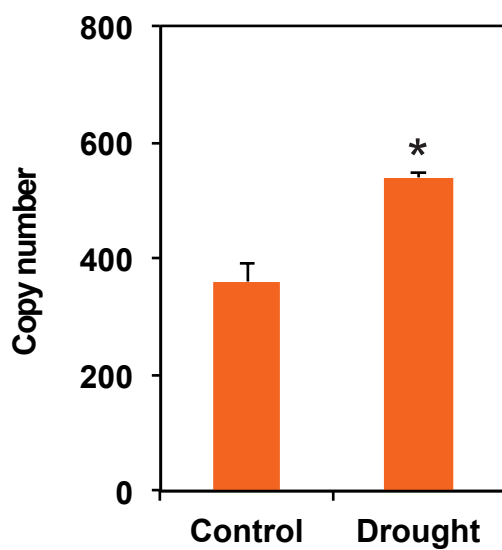

d

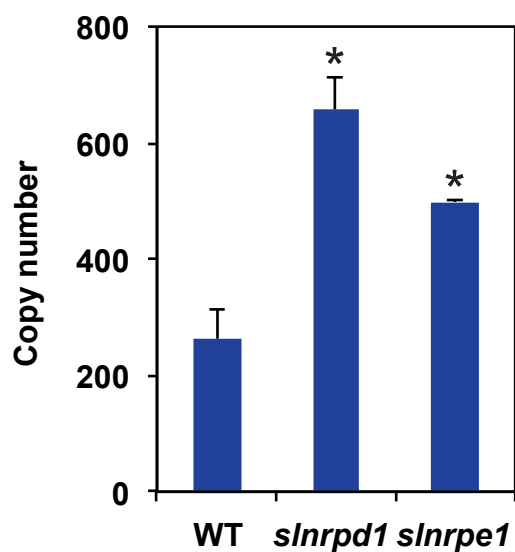

e

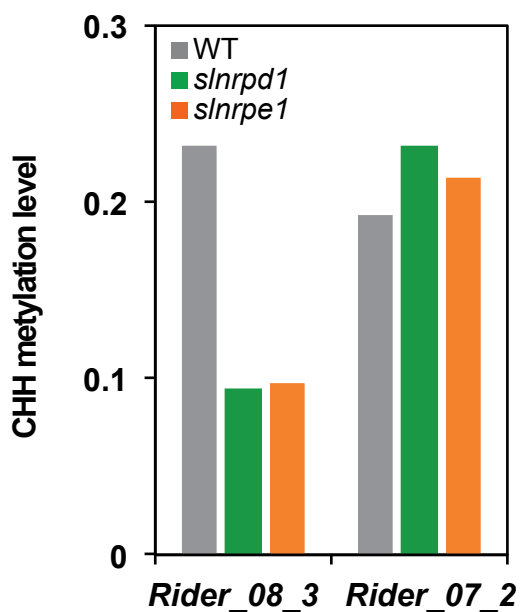

f

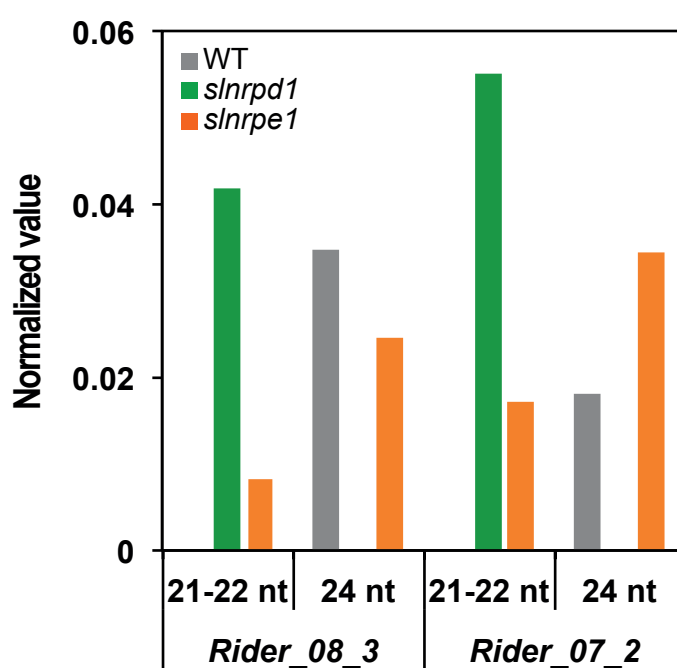

Figure 4

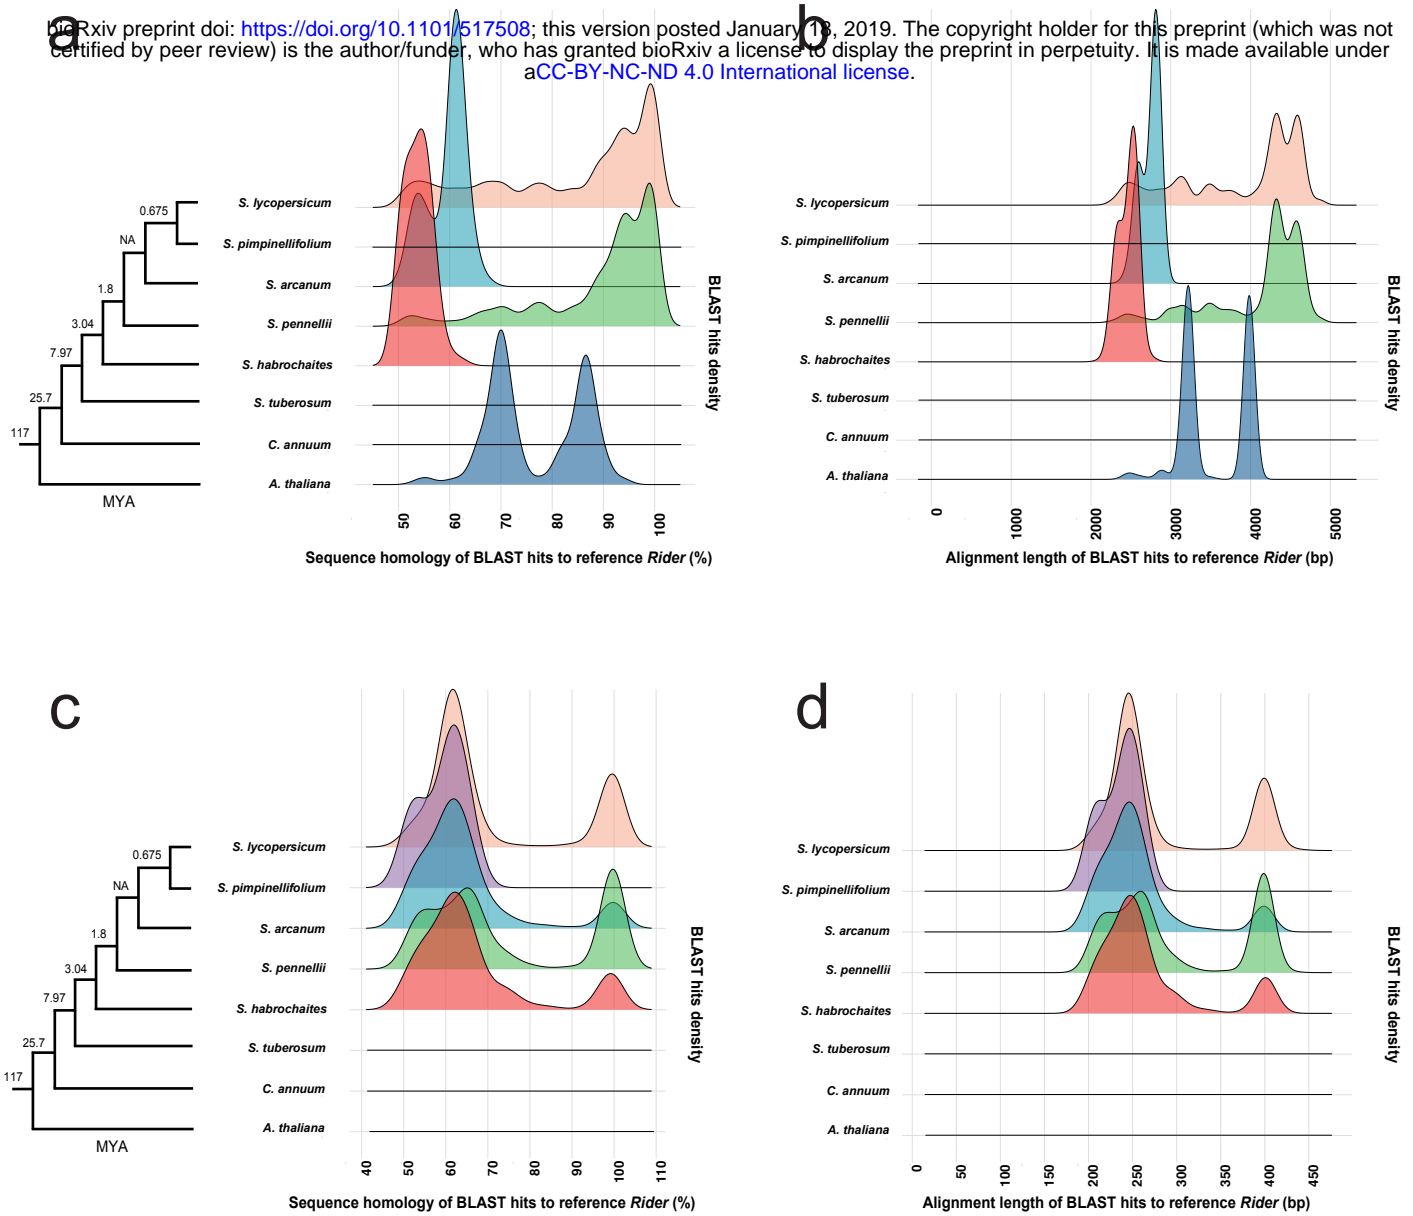

Figure 5

Table 1

|                                               | LTR identity (%) |       |       | Total (%) |
|-----------------------------------------------|------------------|-------|-------|-----------|
|                                               | 98-100           | 95-98 | 85-95 |           |
| Number of elements in chromosome arms         | 5                | 6     | 3     | 19.7      |
| Number of elements in pericentromeric regions | 5                | 23    | 29    | 80.3      |
| Total                                         | 10               | 29    | 32    | 100.0     |

Table 2

|              | Presence of gene within 2 kb (%) | Number of elements in chromosome arms (%) |
|--------------|----------------------------------|-------------------------------------------|
| Rider_85-95  | 37.5                             | 9.4                                       |
| Rider_95-98  | 48.3                             | 20.7                                      |
| Rider_98-100 | 50.0                             | 50                                        |
