1 **Environmental and epigenetic regulation of *Rider* retrotransposons in**  
2 **tomato**

3

4 Matthias Benoit<sup>1, \*</sup>, Hajk-Georg Drost<sup>1</sup>, Marco Catoni<sup>1</sup>, Quentin Gouil<sup>2</sup>, Sara  
5 Lopez-Gomollon<sup>2</sup>, David Baulcombe<sup>2</sup> and Jerzy Paszkowski<sup>1, \*</sup>

6

7 **Affiliation**

8 <sup>1</sup> The Sainsbury Laboratory, University of Cambridge, Cambridge CB2 1LR,  
9 United Kingdom

10 <sup>2</sup> Department of Plant Sciences, University of Cambridge, Cambridge CB2  
11 3EA, United Kingdom

12

13 \* To whom correspondence should be addressed:

14 Matthias Benoit: Tel: +1 (516) 368-8330; Fax: +1 (516) 367-8369; Email:  
15 benoit@cschl.edu

16 Jerzy Paszkowski: Tel: +48 728 195 841; Email: jurek@paszkowski.com

17

18 Present address:

19 [Matthias Benoit], Howard Hugues Medical Institute, Cold Spring Harbor  
20 Laboratory, Cold Spring Harbor, NY 11724, USA

21 [Marco Catoni], School of Biosciences, University of Birmingham, Birmingham  
22 B15 2TT, United Kingdom

23 [Quentin Gouil], Walter and Eliza Hall Institute of Medical Research, 1G Royal  
24 Parade, Parkville 3052, Australia

25 [Jerzy Paszkowski], Radachowka 37, 05-340 Kolbiel, Poland

26

27 **Contact Information**

28 Matthias Benoit: benoit@cschl.edu

29 Hajk-Georg Drost: hgd23@cam.ac.uk

30 Marco Catoni: m.catoni@bham.ac.uk

31 Quentin Gouil: gouil.q@wehi.edu.au

32 Sara Lopez-Gomollon: sl750@cam.ac.uk

33 David Baulcombe: dcb40@cam.ac.uk

34 Jerzy Paszkowski: jurek@paszkowski.com

35 **ABSTRACT**

36

37 Transposable elements in crop plants are the powerful drivers of phenotypic  
38 variation that has been selected during domestication and breeding programs.

39 In tomato, transpositions of the LTR (long terminal repeat) retrotransposon  
40 family *Rider* have contributed to various phenotypes of agronomical interest,  
41 such as fruit shape and colour. However, the mechanisms regulating *Rider*  
42 activity are largely unknown. We have developed a bioinformatics pipeline for  
43 the functional annotation of retrotransposons containing LTRs and defined all  
44 full-length *Rider* elements in the tomato genome. Subsequently, we showed  
45 that accumulation of *Rider* transcripts and transposition intermediates in the  
46 form of extrachromosomal DNA is triggered by drought stress and relies on  
47 abscisic acid signalling. We provide evidence that residual activity of *Rider* is  
48 controlled by epigenetic mechanisms involving siRNAs and the RNA-  
49 dependent DNA methylation pathway. Finally, we demonstrate the broad  
50 distribution of *Rider-like* elements in other plant species, including crops. Thus  
51 our work identifies *Rider* as an environment-responsive element and a  
52 potential source of genetic and epigenetic variation in plants.

53

54

## 55 INTRODUCTION

56

57 Transposable elements (TEs) replicate and move within host genomes.  
58 Based on their mechanisms of transposition, TEs are either DNA transposons  
59 that use a cut-and-paste mechanism or retrotransposons that transpose  
60 through an RNA intermediate via a copy-and-paste mechanism [1]. TEs make  
61 up a significant part of eukaryotic chromosomes and are a major source of  
62 genetic instability that, when active, can induce deleterious mutations. Various  
63 mechanisms have evolved that protect plant genomes, including the  
64 suppression of TE transcription by epigenetic silencing that restricts TE  
65 movement and accumulation [2–5].

66 Chromosomal copies of transcriptionally silenced TEs are typically  
67 hypermethylated at cytosine residues and are associated with nucleosomes  
68 containing histone H3 di-methylated at lysine 9 (H3K9me2). In addition, they  
69 are targeted by 24-nt small interfering RNAs (24-nt siRNAs) that guide RNA-  
70 dependent DNA methylation (RdDM), forming a self-reinforcing silencing loop  
71 [6–8]. Interference with these mechanisms can result in the activation of  
72 transposons. For example, loss of DNA METHYLTRANSFERASE 1 (MET1),  
73 the main methyltransferase maintaining methylation of cytosines preceding  
74 guanines (CGs), results in the activation of various TE families in *Arabidopsis*  
75 [9–11] and in rice [12]. Mutation of CHROMOMETHYLASE 3 (CMT3),  
76 mediating DNA methylation outside CGs, triggers the mobilization of several  
77 TE families, including *CACTA* elements in *Arabidopsis* [10] and *Tos17* and  
78 *Tos19* in rice [13]. Interference with the activity of the chromatin remodelling  
79 factor DECREASE IN DNA METHYLATION 1 (DDM1), as well as various  
80 components of the RdDM pathway, leads to the activation of specific subsets  
81 of TEs in *Arabidopsis*. These include DNA elements *CACTA* and *MULE*, as  
82 well as retrotransposons *ATGP3*, *COPIA13*, *COPIA21*, *VANDAL21*, *EVADÉ*  
83 and *DODGER* [14–17]. Similarly, loss of *OsDDM1* genes in rice results in the  
84 transcriptional activation of TE-derived sequences [18].

85 In addition to interference with epigenetic silencing, TE activation can  
86 also be triggered by environmental stresses. In her pioneering studies,  
87 Barbara McClintock denoted TEs as “controlling elements”, thus suggesting  
88 that they are activated by genomic stresses and are able to regulate the

89 activities of genes [19, 20]. In the meantime, a plethora of stress-induced TEs  
90 have been described, including retrotransposons. For example, the biotic  
91 stress-responsive *Tnt1* and *Tto1* families in tobacco [21,22], the cold-  
92 responsive *Tcs* family in citrus [23], the virus-induced *Bs1* retrotransposon in  
93 maize [24], the heat-responsive retrotransposons *Go-on* in rice [25], and  
94 *ONSEN* in Arabidopsis [26,27]. While heat-stress is sufficient to trigger  
95 *ONSEN* transcription and the formation of extrachromosomal DNA (ecDNA),  
96 transposition was observed only after the loss of siRNAs, suggesting that the  
97 combination of impaired epigenetic control and environmental stress is a  
98 prerequisite for *ONSEN* transposition [28]. Interestingly, retrotransposition  
99 occurs during flower development, which fuels the diversification of *ONSEN*  
100 insertion patterns in the progenies of plants permitting *ONSEN* movement  
101 [29].

102         The availability of high-quality genomic sequences revealed that LTR  
103 (Long Terminal Repeat) retrotransposons make up a significant proportion of  
104 plant chromosomes, from approximately 10% in Arabidopsis, 25% in rice,  
105 42% in soybean, and up to 75% in maize [30]. In tomato (*Solanum*  
106 *lycopersicum*), a model crop plant for research on fruit development, LTR  
107 retrotransposons make up about 60% of the genome [31]. Despite the  
108 abundance of retrotransposons in the tomato genome, only a limited number  
109 of studies have linked TE activities causally to phenotypic alterations.  
110 Remarkably, the most striking examples described so far involve the  
111 retrotransposon family *Rider*. For example, fruit shape variation is based on  
112 copy number variation of the *SUN* gene, which underwent *Rider*-mediated  
113 trans-duplication from chromosome 10 to chromosome 7. The new insertion  
114 of the *SUN* gene into chromosome 7 in the variety “Sun1642” results in its  
115 overexpression and consequently in the elongated tomato fruits that were  
116 subsequently selected by breeders [32,33]. The *Rider* element generated an  
117 additional *SUN* locus on chromosome 7 that encompassed more than 20 kb  
118 of the ancestral *SUN* locus present on chromosome 10 [32]. This large  
119 “hybrid” retroelement landed in the fruit-expressed gene *DEFL1*, resulting in  
120 high and fruit-specific expression of the *SUN* gene containing the  
121 retroelement [33]. The transposition event was estimated to have occurred

122 within the last 200-500 years, suggesting that duplication of the *SUN* gene  
123 occurred after tomato domestication [34].

124 Jointless pedicel is a further example of a *Rider*-induced tomato  
125 phenotype that has been selected during tomato breeding. This phenotypic  
126 alteration reduces fruit dropping and thus facilitates mechanical harvesting.  
127 Several independent jointless alleles were identified around 1960 [35–37].  
128 One of them involves a new insertion of *Rider* into the first intron of the  
129 *SEPALLATA* MADS-Box gene, *Solyc12g038510*, that provides an alternative  
130 transcription start site and results in an early nonsense mutation [38]. Also,  
131 the ancestral yellow flesh mutation in tomato is due to *Rider*-mediated  
132 disruption of the *PSY1* gene, which encodes a fruit-specific phytoene  
133 synthase involved in carotenoid biosynthesis [39,40]. Similarly, the “potato  
134 leaf” mutation is due to a *Rider* insertion in the *C* locus controlling leaf  
135 complexity [41]. *Rider* retrotransposition is also the cause of the chlorotic  
136 tomato mutant *fer*, identified in the 1960s [42]. This phenotype has been  
137 linked to *Rider*-mediated disruption of the *FER* gene encoding a bHLH-  
138 transcription factor. *Rider* landed in the first exon of the gene [43,44].  
139 Sequence analysis of the element revealed that the causative copy of *Rider* is  
140 identical to that involved in the *SUN* gene duplication [44].

141 The *Rider* family belongs to the *Copia* superfamily and is ubiquitous in  
142 the tomato genome [33,44]. Based on partial tomato genome sequences, the  
143 number of *Rider* copies was estimated to be approximately 2000 [33].  
144 Previous DNA blots indicated that *Rider* is also present in wild tomato  
145 relatives but is absent from the genomes of potato, tobacco, and coffee,  
146 suggesting that amplification of *Rider* happened after the divergence of potato  
147 and tomato approximately 6.2 mya [44,45]. The presence of *Rider* in  
148 unrelated plant species has also been suggested [46]. However, incomplete  
149 sub-optimal sampling and the low quality of genomic sequence assemblies  
150 has hindered a comprehensive survey of *Rider* elements within the plant  
151 kingdom.

152 Considering that the *Rider* family is a major source of phenotypic  
153 variation in tomato, it is surprising that its members and their basic activities,  
154 as well as their responsiveness and the possible triggers of environmental  
155 super-activation, which explain the evolutionary success of this family, remain

156 largely unknown. Contrary to the majority of TEs characterized to date,  
157 previous analyses revealed that *Rider* is constitutively transcribed and  
158 produces full-length transcripts in tomato [33], but the stimulatory conditions  
159 promoting reverse transcription of *Rider* transcripts that results in  
160 accumulation as extrachromosomal DNA are unknown.

161 To fill these gaps, we provide here a refined annotation of full-length  
162 *Rider* elements in tomato using the most recent genome release (SL3.0). We  
163 reveal environmental conditions facilitating *Rider* activation and show that  
164 *Rider* transcription is enhanced by dehydration stress mediated by abscisic  
165 acid (ABA) signalling, which also triggers accumulation of extrachromosomal  
166 DNA. Moreover, we provide evidence that RdDM controls *Rider* activity  
167 through siRNA production and partially through DNA methylation. Finally, we  
168 have performed a comprehensive cross-species comparison of full-length  
169 *Rider* elements in 110 plant genomes, including diverse tomato relatives and  
170 major crop plants, in order to characterise species-specific *Rider* features in  
171 the plant kingdom. Together, our findings suggest that *Rider* is a drought  
172 stress-induced retrotransposon ubiquitous in diverse plant species that may  
173 have contributed to phenotypic variation through the generation of genetic and  
174 epigenetic alterations induced by historical drought periods.

175  
176

## 177 MATERIAL AND METHODS

178

### 179 ***Plant material and growth conditions***

180

181 Tomato plants were grown under standard greenhouse conditions (16 h at  
182 25°C with supplemental lighting of 88 w/m<sup>2</sup> and 8 h at 15°C without). *flacca*  
183 (*flc*), *notabilis* (*not*), and *sitiens* (*sit*) seeds were obtained from Andrew  
184 Thompson, Cranfield University; the *slnrpd1* and *slnrpe1* plants were  
185 described before [47]. For aseptic growth, seeds of *Solanum lycopersicum* cv.  
186 Ailsa Craig were surface-sterilized in 20% bleach for 10 min, rinsed three  
187 times with sterile H<sub>2</sub>O, germinated and grown on half-strength MS media (16  
188 h light and 8 h dark at 24°C).

189

### 190 ***Stress treatments***

191

192 For dehydration stress, two-week-old greenhouse-grown plants were  
193 subjected to water deprivation for two weeks. For NaCl and mannitol  
194 treatments, tomato seedlings were grown aseptically for two weeks prior to  
195 transfer into half-strength MS solution containing 100, 200 or 300 nM NaCl or  
196 mannitol (Sigma) for 24 h. For abscisic acid (ABA) treatments, tomato  
197 seedlings were grown aseptically for two weeks prior to transfer into half-  
198 strength MS solution containing 0.5, 5, 10 or 100 µM ABA (Sigma) for 24 h.  
199 For 5-azacytidine treatments, tomato seedlings were germinated and grown  
200 aseptically on half-strength MS media containing 50 nM 5-azacytidine (Sigma)  
201 for two weeks. For cold stress experiments, two-week-old aseptically grown  
202 plants were transferred to 4°C for 24 h prior to sampling.

203

### 204 ***RNA extraction and quantitative RT-PCR analysis***

205

206 Total RNA was extracted from 200 mg quick-frozen tissue using the TRI  
207 Reagent (Sigma) according to the manufacturer's instructions and  
208 resuspended in 50 µL H<sub>2</sub>O. The RNA concentration was estimated using the  
209 Qubit Fluorometric Quantitation system (Thermo Fisher). cDNAs were  
210 synthesized using a SuperScript VILO cDNA Synthesis Kit (Invitrogen). Real-

211 time quantitative PCR was performed in the LightCycler 480 system (Roche)  
212 using primers listed in Table S1. LightCycler 480 SYBR Green I Master  
213 premix (Roche) was used to prepare the reaction mixture in a volume of 10  
214  $\mu\text{L}$ . Transcript levels were normalized to *SIACTIN* (*Solyc03g078400*). The  
215 results were analysed by the  $\Delta\Delta\text{Ct}$  method.

216

### 217 ***DNA extraction and copy number quantification***

218

219 Tomato DNA was extracted using the Qiagen DNeasy Plant Mini Kit (Qiagen)  
220 following the manufacturer's instructions and resuspended in 30  $\mu\text{L}$   $\text{H}_2\text{O}$ . DNA  
221 concentration was estimated using the Qubit Fluorometric Quantitation  
222 system (Thermo Fisher). Quantitative PCR was performed in the LightCycler  
223 480 system (Roche) using primers listed in Table S1. LightCycler 480 SYBR  
224 Green I Master premix (Roche) was used to prepare the reaction in a volume  
225 of 10  $\mu\text{L}$ . DNA copy number was normalized to *SIACTIN* (*Solyc03g078400*).  
226 Results were analysed by the  $\Delta\Delta\text{Ct}$  method.

227

### 228 ***Extrachromosomal circular DNA detection***

229

230 Extrachromosomal circular DNA amplification was derived from the previously  
231 published mobilome analysis [11]. In brief, extrachromosomal circular DNA  
232 was separated from chromosomal DNA using PlasmidSafe ATP-dependent  
233 DNase (EpiCentre) according to the manufacturer's instructions with the  
234 incubation at 37°C extended to 17 h. The PlasmidSafe exonuclease degrades  
235 linear DNA and thus safeguards circular DNA molecules. Circular DNA was  
236 precipitated overnight at -20°C in 0.1 v/v 3 M sodium acetate (pH 5.2), 2.5 v/v  
237 EtOH and 1  $\mu\text{L}$  glycogen (Sigma). The pellet was resuspended in 20  $\mu\text{L}$   $\text{H}_2\text{O}$ .  
238 Inverse PCR reactions were carried out with 2  $\mu\text{L}$  of DNA solution in a final  
239 volume of 20  $\mu\text{L}$  using the GoTaq enzyme (Promega). The PCR conditions  
240 were as follows: denaturation at 95°C for 5 min, followed by 30 cycles at 95°C  
241 for 30 s, an annealing step for 30 s, an elongation step at 72°C for 60 s, and a  
242 final extension step at 72°C for 5 min. PCR products were separated in 1%  
243 agarose gels and developed by NuGenius (Syngene). Bands were extracted  
244 using the Qiagen Gel Extraction Kit and eluted in 30  $\mu\text{L}$   $\text{H}_2\text{O}$ . Purified



245 amplicons were subjected to Sanger sequencing. Primer sequences are listed  
246 in Table S1.

247

### 248 ***Phylogenetic analysis of de novo identified Rider elements***

249

250 A phylogenetic tree was constructed from the nucleotide sequences of the 71  
251 *Rider* elements using Geneious 9.1.8 ([www.geneious.com](http://www.geneious.com)) and built with the  
252 Tamura-Nei neighbor joining method. Pairwise alignment for the building  
253 distance matrix was obtained using a global alignment with free end gaps and  
254 a cost matrix of 51% similarity.

255

### 256 ***Distribution analysis***

257

258 Genomic coordinates of each of the 71 *Rider* elements identified by *de novo*  
259 annotation using *LTRpred* (<https://github.com/HajkD/LTRpred>) have been  
260 used to establish their chromosomal locations. Coordinates for centromeres  
261 were provided before [31] and pericentromeric regions were defined by high  
262 levels of DNA methylation and H3K9me2 ([47] and David Baulcombe,  
263 personal communication).

264

### 265 ***Accession numbers***

266

267 The Genbank accession number of the reference *Rider* nucleotide sequence  
268 identified in [44] is EU195798.2. We used *Solanum lycopersicum* bisulfite and  
269 small RNA sequencing data (SRP081115) generated in [47].

270

### 271 ***Dating of insertion time***

272

273 Insertion times of *Rider* elements were estimated using the method described  
274 in [44]. Degrees of divergence between LTRs of each individual element were  
275 determined using *LTRpred*. LTR divergence rates were then converted into  
276 dates using the average substitution rate of  $6.96 \times 10^{-9}$  substitutions per  
277 synonymous site per year for tomato [48].

278

279 ***Bisulfite sequencing analysis***

280 We collected data from previously published BS-seq libraries of tomato  
281 mutants of RNA polymerase IV and V and controls [47]: *slnrpe1*  
282 (SRR4013319), *slnrpd1* (SRR4013316), wild type CAS9 (SRR4013314) and  
283 not transformed wild type (SRR4013312). The raw reads were analysed using  
284 our previously established pipeline [49] and aligned to the *Solanum*  
285 *lycopersicum* reference version SL3.0  
286 ([www.solgenomics.net/organism/Solanum\\_lycopersicum/genome](http://www.solgenomics.net/organism/Solanum_lycopersicum/genome)). The  
287 chloroplast sequence (NC\_007898) was used to estimate the bisulfite  
288 conversion (on average above 99%). The R package DMRcaller [50] was  
289 used to summarize the level of DNA methylation in the three cytosine contexts  
290 for each *Rider* copy.

291

292 ***Small RNA sequencing analysis***

293

294 Tomato siRNA libraries were obtained from [47] and analysed using the same  
295 analysis pipeline to align reads to the tomato genome version SL3.0. Briefly,  
296 the reads were trimmed with Trim Galore!  
297 ([www.bioinformatics.babraham.ac.uk/projects/trim\\_galore](http://www.bioinformatics.babraham.ac.uk/projects/trim_galore)) and mapped using  
298 the ShortStack software v3.6 [51]. The siRNA counts on the loci overlapping  
299 *Rider* copies were calculated with R and the package GenomicRanges.

300

301 ***Genome sequence data***

302

303 Computationally reproducible analysis and annotation scripts for the following  
304 sections can be found at <http://github.com/HajkD/RIDER>.

305

306 ***Genomic data retrieval***

307

308 We retrieved genome assemblies for 110 plant species (Table S2) from NCBI  
309 RefSeq [52] using the *meta.retrieval* function from the R package *biomartr*  
310 [53]. For *Solanum lycopersicum*, we retrieved the most recent genome  
311 assembly version SL3.0 from the *Sol Genomics Network*

312 *ftp://ftp.solgenomics.net/tomato\_genome/assembly/build\_3.00/S\_lycopersicu*  
313 *m\_chromosomes.3.00.fa* [54].

314

### 315 **Functional *de novo* annotation of LTR retrotransposons in *Solanaceae*** 316 **genomes**

317

318 Functional *de novo* annotations of LTR retrotransposons for seventeen  
319 genomes from the *Asterids*, *Rosids*, and *monocot* clades (*Asterids*: *Capsicum*  
320 *annuum*, *C. baccatum* MLFT02\_5, *C. chinense* MCIT02\_5, *Coffea canephora*,  
321 *Petunia axillaris*, *Phytophthora inflata*, *Solanum arcanum*, *S. habrochaites*, *S.*  
322 *lycopersicum*, *S. melongena*, *S. pennellii*, *S. pimpinellifolium*, *S. tuberosum*;  
323 *Rosids*: *Arabidopsis thaliana*, *Vitis vinifera*, and *Cucumis melo*; *Monocots*:  
324 *Oryza sativa*) were generated using the *LTRpred.meta* function from the  
325 *LTRpred* annotation pipeline (<https://github.com/HajkD/LTRpred>; also used in  
326 [25]). To retrieve a consistent and comparable set of functional annotations for  
327 all genomes, we consistently applied the following *LTRpred* parameter  
328 configurations to all *Solanaceae* genomes: minlenltr = 100, maxlenltr = 5000,  
329 mindistltr = 4000, maxdisltr = 30000, mintsd = 3, maxtsd = 20, vic = 80,  
330 overlaps = "no", xdrop = 7, motifmis = 1, pbsradius = 60, pbsalilen = c(8,40),  
331 pbsoffset = c(0,10), quality.filter = TRUE, n.orf = 0. The plant-specific tRNAs  
332 used to screen for primer binding sites (PBS) were retrieved from GtRNAdb  
333 [55] and plant RNA [56] and combined in a custom *fasta* file. The hidden  
334 Markov model files for gag and pol protein conservation screening were  
335 retrieved from Pfam [57] using the protein domains RdRP\_1 (PF00680),  
336 RdRP\_2 (PF00978), RdRP\_3 (PF00998), RdRP\_4 (PF02123), RVT\_1  
337 (PF00078), RVT\_2 (PF07727), Integrase DNA binding domain (PF00552),  
338 Integrase zinc binding domain (PF02022), Retrotrans\_gag (PF03732), RNase  
339 H (PF00075), and Integrase core domain (PF00665).

340

### 341 **Sequence clustering of functional LTR retrotransposons from 17** 342 **genomes**

343

344 We combined the *de novo* annotated LTR retrotransposons of the 17 species  
345 mentioned in the previous section in a large *fasta* file and used the cluster

346 program *VSEARCH* [58] with parameter configurations: *vsearch --cluster\_fast*  
347 *--qmask none --id 0.85 --clusterout\_sort --clusterout\_id --strand both --*  
348 *blast6out ---sizeout* to cluster LTR retrotransposons by nucleotide sequence  
349 homology (global sequence alignments). Next, we retrieved the 85%  
350 sequence homology clusters from the *VSEARCH* output and screened for  
351 clusters containing *Rider* sequences. This procedure enabled us to detect  
352 high sequence homology (>85%) sequences of *Rider* across diverse species.

353

### 354 **Nucleotide BLAST search of *Rider* against 110 plant genomes**

355

356 To determine the distribution of *Rider* related sequences across the plant  
357 kingdom, we performed BLASTN [59] searches of *Rider* (= query sequence)  
358 using the function *blast\_genomes* from the R package *metablastr*  
359 (<https://github.com/HajkD/metablastr>) against 110 plant genomes (Table S2)  
360 and the parameter configuration: *blastn -eval 1E-5 -max\_target\_seqs 5000*.  
361 As a result, we retrieved a BLAST hit table containing 11,748,202 BLAST hits.  
362 Next, we filtered for hits that contained at least 50% sequence coverage (=   
363 sequence homology) and throughout at least 50% sequence length homology  
364 to the reference *Rider* sequence. This procedure reduced the initial  
365 11,748,202 BLAST hits to 57,845 hits, which we further refer to as *Rider-like*  
366 elements. These 57,845 *Rider-like* elements are distributed across 21 species  
367 with various abundance frequencies. In a second step, we performed an  
368 analogous BLASTN search using only the 5' LTR sequence of *Rider* to  
369 determine the distribution of *Rider-like* LTR across the plant kingdom. Using  
370 the same BLASTN search strategy described above, we retrieved 9,431 hits.  
371 After filtering for hits that contained at least 50% percent sequence coverage  
372 (= sequence homology) and at least 50% sequence length homology to the  
373 reference *Rider* LTR sequence, we obtained 2,342 BLAST hits distributed  
374 across five species.

375

### 376 **Motif enrichment analysis**

377

378 We tested the enrichment of *cis*-regulatory elements (CREs) in *Rider* using  
379 two approaches. In the first approach, we compared *Rider* CREs to promoter

380 sequences of all 35,092 protein coding genes from the tomato reference  
381 genome. We retrieved promoter sequences 400 bp upstream of the TSS of  
382 the respective genes. We constructed a 2x2 contingency table containing the  
383 respective motif count data of CRE observations in true *Rider* sequences  
384 versus counts in promoter sequences. We performed a Fisher's exact test for  
385 count data to assess the statistical significance of enrichment between the  
386 motif count data retrieved from *Rider* sequences and the motif count data  
387 retrieved from promoter sequences. In the second approach, due to the  
388 unavailability of gene annotation for *Solanum arcanum*, *Solanum*  
389 *habrochaites* and *Solanum pimpinellifolium* we compared *Rider* CREs to  
390 randomly sampled sequence loci from the same genome using the following  
391 two step procedure: in step one, we sampled 1000 DNA sequences with the  
392 same length as the reference *Rider* sequence from 1000 randomly sampled  
393 loci in the tomato reference genome. When sampling, we also considered the  
394 strand direction of the reference *Rider* sequence. Whenever a *Rider*  
395 sequence was annotated in the plus direction, we also sampled the  
396 corresponding set of random sequences in the plus direction of the respective  
397 randomly drawn locus. In contrast, when a *Rider* sequence was annotated in  
398 the minus direction, we also sampled the corresponding set of random  
399 sequences in the minus direction. In step two, we counted CRE occurrences  
400 for each *Rider* sequence independently and for a set of different CREs. Next,  
401 we counted the number of the same CRE occurrences for each random  
402 sequence independently to assess how often these CREs were found in  
403 random sequences. We then, analogous to the first approach, constructed a  
404 2x2 contingency table containing the respective motif count data of CRE  
405 observations in true *Rider* sequences versus counts in random sequences.  
406 We performed a Fisher's exact test for count data to assess the statistical  
407 significance of enrichment between the motif count data retrieved from *Rider*  
408 sequences and the motif count data retrieved from random sequences. The  
409 resulting *P*-values are shown in Table S3 for the first approach and in Table  
410 S4 for the second approach. Computationally reproducible scripts to perform  
411 the motif count analysis can be found at <https://github.com/HajkD/RIDER>.

412

413 **Calculation of N50 metric**

414

415 To assess the genome quality of *Solanaceae* species, we calculated the N50  
416 metric for the genome assemblies of *Solanum lycopersicum*, *S.*

417 *pimpinellifolium*, *S. arcanum*, *S. pennellii*, *S. habrochaites*, and *S. tuberosum*

418 using the following procedure. First, we imported the scaffolds or

419 chromosomes of each respective genome assembly using the R function

420 *read\_genome()* from the *biomartr* package. Next, for each species individually

421 we determined the sequence length for each scaffold or chromosome and

422 sorted them according to length in descending order. The N50 value in Mbp

423 was then calculated in R as follows:  $N50 \leftarrow \text{len.sorted}[\text{cumsum}(\text{len.sorted}) \geq$

424  $\text{sum}(\text{len.sorted}) * 0.5][1] / 1000000$ , where the variable *len.sorted* denotes the

425 vector storing the ordered scaffold or chromosome lengths of a genome

426 assembly.

## 427 RESULTS

428

### 429 Family structure of *Rider* retrotransposons in tomato

430

431 We used the most recent SL3.0 tomato genome release for *de novo*  
432 annotation of *Rider* elements. First, we retrieved full-length, potentially  
433 autonomous retrotransposons using our functional annotation pipeline  
434 (*LTRpred*, see Materials and Methods). We detected a set of 5844 potentially  
435 intact LTR retrotransposons (Table S5). Homology search among these  
436 elements identified 71 elements that share >85% similarity with the reference  
437 *Rider* sequence [44] and thus belong to the *Rider* family. We then determined  
438 the distribution of these *Rider* elements along the tomato chromosomes  
439 (Figure 1A) and also estimated their age based on sequence divergence  
440 between 5' and 3' LTRs (Figure 1A). We classified these elements into three  
441 categories according to their LTR similarity: 80-95%, 95-98% and 98-100%  
442 (Figure S1A). While the first category contains relatively old copies (last  
443 transposition between 10.5 and 3.5 mya), the 95-98% class represents *Rider*  
444 elements that moved between 3.5 and 1.4 mya, and the 98-100% category  
445 includes the youngest *Rider* copies that transposed within the last 1.4 my  
446 (Figure S1A). Out of 71 *Rider* family members, 14 were found in euchromatic  
447 chromosome arms (14/71 or 19.7%) and 57 in heterochromatic regions  
448 (80.3%) (Table 1). In accordance with previous observations based on partial  
449 genomic sequences [33], young *Rider* elements of the 98-100% class are  
450 more likely to reside in the proximity of genes, with 50% within 2 kb of a gene.  
451 This was the case for only 37.5% of old *Rider* members (85-95% class) (Table  
452 2). Such a distribution is consistent with the preferential presence of young  
453 elements within euchromatic chromosome arms (50%, 5/10) compared to old  
454 *Rider* elements (9.4%, 3/32) (Table 2 and Figure S1B). In addition, the  
455 phylogenetic distance between individual elements is moderately correlated to  
456 the age of each element (Figure 1B) (Table S6).

457

### 458 *Rider* is a drought- and ABA-responsive retrotransposon

459

460 To better understand the activation triggers and, thus, the mechanisms  
461 involved in the accumulation of *Rider* elements in the tomato genome, we  
462 examined possible environmental stresses and host regulatory mechanisms  
463 influencing their activity. Transcription of an LTR retroelement initiates in its 5'  
464 LTR and is regulated by an adjacent promoter region that usually contains *cis*-  
465 regulatory elements (CREs) (reviewed in [60]). Therefore, we aligned the  
466 sequence of the *Rider* promoter region against sequences stored in the  
467 PLACE database ([www.dna.affrc.go.jp/PLACE/](http://www.dna.affrc.go.jp/PLACE/)) containing known CREs and  
468 identified several dehydration-responsive elements (DREs) and sequence  
469 motifs linked to ABA signalling (Figure 2A). First, we tested whether these  
470 CREs were present and enriched in the LTR promoter sequences of the 71 *de*  
471 *novo* annotated *Rider* elements (Table S7). Comparison of *Rider* LTRs to a  
472 set of gene promoter sequences of the same length revealed significant  
473 enrichment of several CREs in *Rider* LTRs (Fisher's exact test  $P < 0.001$ )  
474 (Table S3). It is known, for example, that the CGCG sequence motif at  
475 position 89-94 (Figure 2A) is recognized by transcriptional regulators binding  
476 calmodulin. These are products of signal-responsive genes activated by  
477 various environmental stresses and phytohormones such as ABA [61]. We  
478 also detected two MYB recognition sequence motifs (CTGTTG at position  
479 176-181 bp, and CTGTTA at position 204-209 bp) (Figure 2A). MYB  
480 recognition sequences are usually enriched in the promoters of genes with  
481 transcriptional activation during water stress, elevated salinity, and ABA  
482 treatments [62,63]. In addition, an ABA-responsive element-like (ABRE-like)  
483 was found at position 332-337 bp in the R region of *Rider*'s LTR, along with a  
484 coupling element (CE3) located at position 357-372 bp (Figure 2A). The co-  
485 occurrence of ABRE-like and CE3 has often been found in ABA-responsive  
486 genes [64,65].

487 The simultaneous presence of these five CREs in promoters of *Rider*  
488 elements suggests that *Rider* transcription may be induced by environmental  
489 stresses such as dehydration and salinity that involves ABA mediated  
490 signalling. To test whether *Rider* transcription is stimulated by drought stress,  
491 glasshouse-grown tomato plants were subjected to water deprivation and  
492 levels of *Rider* transcripts quantified by RT-qPCR (Figure 2B). When  
493 compared to control plants, we observed a 4.4-fold increase in *Rider*



494 transcript abundance in plants subjected to drought stress. Thus, *Rider*  
495 transcription appears to be stimulated by drought.

496 To further test this finding, we re-measured levels of *Rider* transcripts  
497 in different experimental setups. *In vitro* culture conditions with increasing  
498 levels of osmotic stress were used to mimic increasing drought severity  
499 (Figure 2C). Transcript levels of *Rider* increased in a dose-dependent fashion  
500 with increasing mannitol concentration, corroborating results obtained during  
501 direct drought stress in greenhouse conditions. Interestingly, tomato seedlings  
502 treated with NaCl also exhibited increased levels of *Rider* transcripts (Figure  
503 2C).

504 ABA is a versatile phytohormone involved in plant development and  
505 abiotic stress responses, including drought stress [66]. Therefore, we asked  
506 whether *Rider* transcriptional drought-responsiveness is mediated by ABA  
507 and whether increased ABA can directly stimulate *Rider* transcript  
508 accumulation. To answer the first question, we exploited tomato mutants  
509 defective in ABA biosynthesis. The lines *flacca* (*flc*), *notabilis* (*not*) and *sitiens*  
510 (*sit*) have mutations in genes encoding a sulphurylase [67], a 9-cis-epoxy-  
511 carotenoid dioxygenase (*SINCED1*) [68,69], and an aldehyde oxidase [70],  
512 respectively. Both *flc* and *sit* are impaired in the conversion of ABA-aldehyde  
513 to ABA [67,70], while *not* is unable to catalyse the cleavage of 9-cis-  
514 violaxanthin and/or 9-cis-neoxanthin to xanthoxin, an ABA precursor [69].  
515 Glasshouse-grown *flc*, *not* and *sit* mutants and control wild-type plants were  
516 subjected to water deprivation treatment and *Rider* transcript levels quantified  
517 by RT-qPCR (Figure 2D). *Rider* transcript levels were reduced in *flc*, *not* and  
518 *sit* by 43%, 26% and 56%, respectively.

519 To examine whether ABA stimulates accumulation of *Rider* transcripts,  
520 tomato seedlings were transferred to media supplemented with increasing  
521 concentrations of ABA (Figure 2E). The levels of *Rider* transcripts increased  
522 in a dose-dependent manner with increasing ABA concentrations. This  
523 suggests that ABA is not only involved in signalling that results in hyper-  
524 activation of *Rider* transcription during drought, but it also directly promotes  
525 the accumulation of *Rider* transcripts. The effectiveness of the treatments was  
526 verified by assaying expression of the stress- and ABA-responsive gene  
527 *SIASR1* (Figure S2A-F).

528 Identification in the U3 region of *Rider* LTRs of a binding domain for C-  
529 repeat binding factors (CBF), which are regulators of the cold-induced  
530 transcriptional cascade [64,71], led us to test *Rider* activation by cold stress.  
531 However, *Rider* transcription was not affected by cold treatment, leaving  
532 drought and salinity as the predominant environmental stresses identified so  
533 far that stimulate accumulation of *Rider* transcripts (Figure S2G).

534

### 535 **RdDM regulates levels of *Rider* transcripts**

536

537 The suppression of transposon-derived transcription by epigenetic  
538 mechanisms, which typically include DNA methylation, maintains genome  
539 integrity [2,3,5]. We asked whether *Rider* transcription is also restricted by  
540 DNA methylation. Tomato seedlings were grown on media supplemented with  
541 5-azacytidine, an inhibitor of DNA methyltransferases. *Rider* transcript steady-  
542 state levels increased in plants treated with 5-azacytidine compared to  
543 controls (Figure 3A). Comparison of *Rider* transcript accumulation in 5-  
544 azacytidine-treated and ABA-treated plants revealed similar levels of  
545 transcripts and the levels were similar when the treatments were applied  
546 together ( $P < 0.05$ ; Figure 3A).

547 To further examine the role of DNA methylation in controlling *Rider*  
548 transcription, we took advantage of tomato mutants defective in crucial  
549 components of the RdDM pathway, namely SINRPD1 and SINRPE1, the  
550 major subunits of RNA Pol IV and Pol V, respectively. These mutants exhibit  
551 reduced cytosine methylation at CHG and CHH sites (in which H is any base  
552 other than G) residing mostly at the chromosome arms, with *slnrpd1* showing  
553 a dramatic, genome-wide loss of 24-nt siRNAs [47]. To evaluate the role of  
554 RdDM in *Rider* transcript accumulation, we first assessed the consequences  
555 of impaired RdDM on siRNA populations at full-length *Rider* elements.  
556 Deficiency in SINRPD1 resulted in a complete loss of 24-nt siRNAs that target  
557 *Rider* elements (Figure 3B). This loss was accompanied by a dramatic  
558 increase (approximately 80-fold) in 21-22-nt siRNAs at *Rider* loci (Figure 3B).  
559 In contrast, the mutation in SINRPE1 triggered increases in both 21-22-nt and  
560 24-nt siRNAs targeting *Rider* elements (Figure 3B). We then asked whether  
561 altered distribution of these siRNA classes is related to the age of the *Rider*

562 elements and/or their chromosomal position, and thus local chromatin  
563 properties. Compilation of the genomic positions and siRNA data in RdDM  
564 mutants didn't reveal preferential accumulation of 21-22-nt siRNAs (Figure  
565 S3A) or 24-nt siRNAs (Figure S3B) over specific *Rider* classes. Subsequently,  
566 we examined whether loss of SINRPD1 or SINRPE1 was sufficient to increase  
567 levels of *Rider* transcripts and observed increased accumulation of *Rider*  
568 transcripts in both *slnrpd1* and *slnrpe1* compared to WT (Figure 3C).

569 We assessed whether this increase in *Rider* transcript levels is linked  
570 to changes in DNA methylation levels in *Rider* elements of RdDM mutants.  
571 There was no significant change in global DNA methylation in the three  
572 sequence contexts in the 71 *de novo* annotated *Rider* elements (Figure S3C),  
573 despite a tendency for young *Rider* elements to lose CHH in *slnrpd1* and  
574 *slnrpe1* (Figure S3D). Thus, the RdDM pathway affects the levels of *Rider*  
575 transcripts but there was no direct link to DNA methylation levels.

576

### 577 **Extrachromosomal circular DNA of *Rider* accumulates during drought** 578 **stress and in *slnrpd1* and *slnrpe1* mutants**

579

580 The life cycle of LTR retrotransposons starts with transcription of the element,  
581 then the synthesis and maturation of accessory proteins including reverse  
582 transcriptase and integrase, reverse transcription, and the production of  
583 extrachromosomal linear (ecl) DNA that integrates into a new genomic  
584 location [72]. In addition, eclDNA can be a target of DNA repair and can be  
585 circularised by a non-homologous end-joining mechanism or homologous  
586 recombination between LTRs, resulting in extrachromosomal circular DNA  
587 (eccDNA) [73–76]. We searched for eccDNA to evaluate the consequences of  
588 increased *Rider* transcript accumulation due to drought stress or an impaired  
589 RdDM pathway on subsequent steps of the transposition cycle. After  
590 exonuclease-mediated elimination of linear dsDNA and circular ssDNA, *Rider*  
591 eccDNA was amplified by sequence-specific inverse PCR (Figure 4A). *Rider*  
592 eccDNA was absent in plants grown in control conditions but was detected in  
593 plants subjected to drought stress (Figure 4A). Sanger sequencing of the  
594 inverse PCR products showed that the amplified eccDNA probably originates  
595 from the *Rider\_08\_3* copy, which has 98.2 % sequence homology of the 5'

596 and 3' LTR sequences (Figure S4A). Residual sequence divergence may be  
597 due to genotypic differences between the reference genomic sequence and  
598 the genome of our experimental material. Analysis of CREs in the LTR of the  
599 eccDNA revealed the presence of all elements identified previously with the  
600 exception of a single nucleotide mutation located in the *CGCGBOXAT* box  
601 (Figure S4A). This suggests that while this CRE is not required for production  
602 of *Rider* eccDNA upon drought stress, presence of all other CREs including  
603 the two *MYBCORE* elements is likely to be necessary for its activation.

604 Examination by quantitative PCR of the accumulation of *Rider* DNA,  
605 which included extrachromosomal and genomic copies, in drought-stressed  
606 plants also revealed an increase in *Rider* copy number due to eccDNA (Figure  
607 4B). Importantly, *Rider* eccDNA was not detected in *sit* mutants subjected to  
608 drought stress (Figure 4A), suggesting that induced transcription of *Rider* by  
609 drought stress triggers production of extrachromosomal DNA and this  
610 response requires ABA biosynthesis.

611 We also examined the accumulation of *Rider* eccDNA in plants  
612 impaired in RdDM. Interestingly, *Rider* eccDNA was detected in *slnrpd1* and  
613 *slnrpe1* (Figure 4C) and increase in *Rider* DNA copy number due to eccDNA  
614 accumulation was confirmed by qPCR (Figure 4D). Absence of newly  
615 integrated genomic copies has been further validated by genome sequencing.  
616 The eccDNA forms differed between the mutants (Figure 4C). Sequencing of  
617 *Rider* eccDNA in *slnrpd1* showed a sequence identical to the *Rider* eccDNA of  
618 wild-type plants subjected to drought stress. Thus the *Rider\_08\_3* copy is  
619 probably the main contributor to eccDNA in drought and in *slnrpd1*. In  
620 contrast, eccDNA recovered from *slnrpe1* had a shorter LTR (287 bp) and the  
621 highest sequence similarity with *Rider\_07\_2* (89.2 %) (Figure S4B).  
622 Shortening of the LTR in this particular element is associated with the loss of  
623 the upstream *MYBCORE* as well as the *CGCGBOXAT* elements (Figure  
624 S4B). This suggests that in the absence of *SINRPE1*, presence of these  
625 CREs is facultative for eccDNA production originating from this copy. In  
626 contrast, the absence of eccDNA copies derived from this element upon  
627 dehydration suggests that both *MYBCORE* elements are required for effective  
628 *Rider* activation upon drought stress.

629 We then asked whether DNA methylation and siRNA distribution at  
630 these particular *Rider* copies had changed in the mutants. DNA methylation at  
631 CHH sites, but not CG nor CHG, was drastically reduced at *Rider\_08\_3* in  
632 *slnrpd1* (Figure 4E and Figure S4C-E) together with a complete loss of 24-nt  
633 siRNAs at this locus (Figure 4F and Figure S4F) but DNA methylation at  
634 *Rider\_07\_2* was not affected, despite the deficiency of SINRPD1 or SINRPE1  
635 (Figure 4E and Figure S4C-E). Levels of 21-22-nt siRNAs in both mutants and  
636 24-nt siRNA in *slnrpe1* were increased (Figure 4F and Figure S4F-G).  
637 Altogether, this suggests that RdDM activity on *Rider* is highly copy-specific  
638 and that different components of the RdDM pathway differ in their effects on  
639 *Rider* silencing.

640

#### 641 ***Rider* families in other plant species**

642

643 To examine the distribution of *Rider* retrotransposons in other plant  
644 species, we searched for *Rider*-related sequences across the genomes of  
645 further *Solanaceae* species, including wild tomatoes, potato (*Solanum*  
646 *tuberosum*), and pepper (*Capsicum annuum*). We used the *Rider* reference  
647 sequence [44] as the query against genome sequences of *Solanum arcanum*,  
648 *S. habrochaites*, *S. lycopersicum*, *S. pennellii*, *S. pimpinellifolium*, *S.*  
649 *tuberosum*, and *Capsicum annuum* (genome versions are listed in Materials  
650 and Methods). Two BLAST searches were performed, one using the entire  
651 *Rider* sequence as the query and the other using only the *Rider* LTR.  
652 Consistent with previous reports, *Rider-like* elements are present in wild  
653 relatives of tomato such as *S. arcanum*, *S. pennellii* and *S. habrochaites*;  
654 however, the homology levels and their lengths vary significantly between  
655 species (Figure 5A). While *S. arcanum* and *S. habrochaites* exhibit high peak  
656 densities at 55% and 61% homology, respectively, *S. pennellii* show a high  
657 peak density at 98% over the entire *Rider* reference sequence (Figure 5A).  
658 This suggests that the *S. arcanum* and *S. habrochaites* genomes harbour  
659 mostly *Rider-like* elements with relatively low sequence similarity, while *S.*  
660 *pennellii* retains full-length *Rider* elements.

661 To better visualize this situation, we aligned the BLAST hits to the  
662 reference *Rider* copy (Figure 5B). This confirmed that *Rider* elements in *S.*

663 *pennellii* are indeed mostly full-length *Rider* homologs showing high density of  
664 hits throughout their lengths, while BLAST hits in the *S. arcanum* and *S.*  
665 *habrochaites* genomes showed only partial matches over the 4867 bp of the  
666 reference *Rider* sequence (Figure 5B). Unexpectedly, this approach failed to  
667 detect either full-length or truncated *Rider* homologs in the close relative of  
668 tomato, *S. pimpinellifolium*. Extension of the same approaches to the  
669 genomes of the evolutionary more distant *S. tuberosum* and *Capsicum*  
670 *annuum* failed to detect substantial *Rider* homologs (Figure 5A-B), confirming  
671 the absence of *Rider* in the potato and pepper genomes [44]. As a control, we  
672 also analysed *Arabidopsis thaliana*, since previous studies reported the  
673 presence of *Rider* homologs in this model plant [44]. Using the BLAST  
674 approach above, we repeated the results provided in [44] and found BLAST  
675 hits of high sequence homology to internal sequences of *Rider* in the  
676 *Arabidopsis thaliana* genome. However, we did not detect sequence  
677 homologies to *Rider* LTRs (Figure 5C-D). Motivated by this finding and the  
678 possibility that *Rider* homologs in other species may have highly divergent  
679 LTRs, we screened for *Rider* LTRs that would have been missed in the  
680 analysis shown in Figure 5A-B due to the use of the full-length sequence of  
681 *Rider* as the query. Using the *Rider* LTR as a query revealed that *S. pennellii*,  
682 *S. arcanum* and *S. habrochaites* retain intact *Rider* LTR homologs, but *S.*  
683 *pimpinellifolium* exhibits a high BLAST hit density exclusively at approximately  
684 60% homology. This suggests strong divergence of *Rider* LTRs in this species  
685 (Figure 5C-D). Overall, the results indicate intact *Rider* homologs in some  
686 *Solanaceae* species, whereas sequence similarities to *Rider* occur only within  
687 the coding area of the retrotransposons in more distant plants such as  
688 *Arabidopsis thaliana*. Therefore, LTRs, which include the *cis*-regulatory  
689 elements conferring stress-responsiveness, diverge markedly between  
690 species.

691 To address the specificity of this divergence in *Solanaceae* species, we  
692 examined whether the CREs enriched in *S. lycopersicum* (Figure 2A) are  
693 present in LTR sequences of the *Rider* elements in *S. pennellii*, *S. arcanum*,  
694 *S. habrochaites* and *S. pimpinellifolium* (Figure 5C). While the LTRs identified  
695 in *S. pennellii*, *S. arcanum* and *S. habrochaites* retained all five previously  
696 identified CREs, more distant LTRs showed shortening of the U3 region

697 associated with loss of the CGCG box (Figure S5 and Table S4). This was  
698 observed already in *S. pimpinellifolium*, where all identified *Rider* LTRs lacked  
699 part of the U3 region containing the CGCG box (Supplementary Figure 5).  
700 Thus, *Rider* distribution and associated features differ even between closely  
701 related *Solanaceae* species, correlated with the occurrence of a truncated U3  
702 region and family-wide loss of CREs.

703 Finally, to test the evolutionary conservation of *Rider* elements across  
704 the plant kingdom, we performed *Rider* BLAST searches against all 110 plant  
705 genomes available at the NCBI Reference Sequence (RefSeq) database  
706 ([www.ncbi.nlm.nih.gov/refseq](http://www.ncbi.nlm.nih.gov/refseq)). Using the entire *Rider* sequence as the query  
707 to measure the abundance of *Rider* homologs throughout these genomes, we  
708 found *Rider* homologs in 14 diverse plant species (Figure S6). This suggests  
709 that *Rider* in tomato did not originate by horizontal transfer from *Arabidopsis*  
710 as initially suggested [44], but rather that *Rider* was already present in the last  
711 common ancestor of these plant species and persisted or was subsequently  
712 eradicated from the genomes. The limited conservation of *Rider* LTR  
713 sequences in the same 14 species, revealed using the LTR sequence as the  
714 query, suggests that *Rider* LTRs are rapidly evolving and that drought-  
715 responsive CREs may be restricted to *Solanaceae* (Figure S7).

716  
717

718 **DISCUSSION**

719

720 *High-resolution map of full-length Rider elements in the tomato genome*

721

722 Comprehensive analysis of individual LTR retrotransposon families in  
723 complex plant genomes has been facilitated and become more accurate with  
724 the increasing availability of high-quality genome assemblies. Here, we took  
725 advantage of the most recent tomato genome release (SL3.0) to characterize  
726 with improved resolution the high-copy-number *Rider* retrotransposon family.  
727 Although *Rider* activity has been causally linked to the emergence of  
728 important agronomic phenotypes in tomato, the triggers of *Rider* have  
729 remained elusive. Despite the relatively low proportion (approximately 20%) of  
730 euchromatic chromosomal regions in the tomato genome [31]), our *de novo*  
731 functional annotation of full-length *Rider* elements revealed preferential  
732 compartmentalization of recent *Rider* insertions within euchromatin compared  
733 to aged insertions. Mapping analyses further revealed that recent rather than  
734 aged *Rider* transposition events are more likely to modify the close vicinity of  
735 genes. However, *Rider* copies inserted into heterochromatin have been  
736 passively maintained for longer periods. This differs significantly from other  
737 retrotransposon families in tomato such as *Tnt1*, *ToRTL1* and *T135*, which  
738 show initial, preferential insertions into heterochromatic regions [77]. *TARE1*,  
739 a high-copy-number *Copia-like* element, is present predominantly in  
740 pericentromeric heterochromatin [78]. Another high-copy-number  
741 retrotransposon, *Jinling*, is also enriched in heterochromatic regions, making  
742 up about 2.5% of the tomato nuclear genome [79]. The *Rider* propensity to  
743 insert into gene-rich areas mirrors the insertional preferences of the *ONSEN*  
744 family in Arabidopsis. Since new *ONSEN* insertions confer heat-  
745 responsiveness to neighbouring genes [28,29], it is tempting to speculate that  
746 genes in the vicinity of new *Rider* insertions may acquire, at least transiently,  
747 drought-responsiveness.

748

749

750

751



752 *Environmental and epigenetic regulation of Rider activity*

753

754 We found that *Rider* transcript levels are elevated during dehydration stress  
755 mediated by ABA-dependent signalling. The activation of retrotransposons  
756 upon environmental cues has been shown extensively to rely on the presence  
757 of *cis*-regulatory elements within the retrotransposon LTRs [60]. The heat-  
758 responsiveness of *ONSEN* in Arabidopsis [26,27,80], *Go-on* in rice [25], and  
759 *Copia* in Drosophila [81] is conferred by the presence in their LTRs of  
760 consensus sequences found in the promoters of heat-shock responsive  
761 genes. Thus, the host's heat-stress signalling appears to induce  
762 transcriptional activation of the transposon and promote transposition [80].  
763 While *ONSEN* and *Go-on* are transcriptionally inert in the absence of a  
764 triggering stress, transcripts of Drosophila *Copia* are found in control  
765 conditions, resembling the regulatory situation in *Rider*. Due to relatively high  
766 constitutive expression, increase in transcript levels of Drosophila *Copia*  
767 following stress appears modest compared to *ONSEN* or *Go-on*, which are  
768 virtually silent in control conditions [25–27,80]. Regulation of Drosophila *Copia*  
769 mirrors that of *Rider*, where transcript levels during dehydration stress are  
770 very high but the relative increase compared to control conditions is rather  
771 modest.

772         The presence of MYB recognition sequences within *Rider* LTRs  
773 suggests that MYB transcription factors participate in transcriptional activation  
774 of *Rider* during dehydration. Multiple MYB subfamilies are involved in ABA-  
775 dependent stress responses in tomato, but strong enrichment of the MYB  
776 core element CTGTTA within *Rider* LTRs suggests involvement of R2R3-MYB  
777 transcription factors, which are markedly amplified in *Solanaceae* [82].  
778 Members of this MYB subfamily are involved in the ABA signalling-mediated  
779 drought-stress response [83] and salt-stress signalling [84]. This possible  
780 involvement of R2R3-MYBs in *Rider* is reminiscent of the transcriptional  
781 activation of the tobacco retrotransposon *Tto1* by the R2R3-MYB, member  
782 NtMYB2 [85]. Drought-responsiveness has been observed for *Rider\_08\_3*  
783 only, despite other individual *Rider* copies displaying intact MYB core element  
784 (Table S7). This suggests that presence of this CRE is not the only feature

785 required for drought-responsiveness, and other factors, such as genomic  
786 location, influence *Rider* activity.

787 In addition to environmental triggers, *Rider* transcript levels are  
788 regulated by the RdDM pathway. Depletion of SINRPD1 and SINRPE1  
789 increases *Rider* transcript abundance, resulting in production of  
790 extrachromosomal circular DNA. Analysis of *Rider*-specific siRNA populations  
791 revealed that siRNA targeting of *Rider* elements is mostly independent of their  
792 genomic location and chromatin context. This is somewhat unexpected since  
793 RdDM activity in tomato seems to be restricted to gene-rich euchromatin and  
794 it was postulated that accessibility of RNA Pol IV to heterochromatin is  
795 hindered by the compact chromatin structure [47,86,87]. We identified *Rider*  
796 copies targeted by RdDM, which potentially influences local epigenetic  
797 features. Loss of SINRPD1 and SINRPE1 leads to over-accumulation of 21-  
798 22-nt siRNAs at *Rider* copies, suggesting that inactivation of canonical RdDM  
799 pathway-dependent transcriptional gene silencing triggers the activity of the  
800 non-canonical RDR6 RdDM pathway at *Rider* [88–90].

801 It is noteworthy that, despite clear effects on *Rider* transcript  
802 accumulation and siRNA accumulation, loss of SINRPD1 and SINRPE1 is not  
803 manifested by drastic changes in total DNA methylation levels of *Rider* at the  
804 family level. This is in accordance with the modest decrease in genome-wide  
805 CHH and CHG methylation described in tomato RdDM mutants, with most of  
806 the changes happening on the euchromatic arms while the pericentromeric  
807 heterochromatin is unaffected [47]. Distribution of the 71 intact *Rider* elements  
808 in both euchromatic and heterochromatic compartments thus likely hampers  
809 detection of major changes DNA methylation over the *Rider* family. Only  
810 young euchromatic *Rider* elements marginally lose CHH methylation in the  
811 *slnrpd1* mutant, but this is modest compared to the general decrease in  
812 mCHH observed throughout the chromosome arms [47]. As expected, CHH  
813 methylation at heterochromatic *Rider* is not affected. This suggests that  
814 SICMT2 is involved in maintenance of mCHH at heterochromatic *Rider* copies  
815 in the absence of SINRPD1, as observed previously for pericentromeric  
816 heterochromatin [47]. In general, our observations suggest that epigenetic  
817 silencing of *Rider* retrotransposons is particularly robust and involves  
818 compensatory pathways.

819 We identified extrachromosomal circular DNA originating from the  
820 *Rider* copies *Rider\_08\_3* and *Rider\_07\_2* in *slnrpd1* and *slnrpe1*,  
821 respectively. In terms of DNA methylation and siRNA distribution at these two  
822 specific copies, loss of SINRPD1 and SINRPE1 brought different copy-specific  
823 outcomes. *Rider\_08\_3*, the main contributor to eccDNA in *slnrpd1*, displayed  
824 a reduction in CHH methylation that may contribute to increased transcription  
825 and the accumulation of eccDNA. In *Rider\_07\_2*, that provides a template for  
826 eccDNA in *slnrpe1*, there was no change in DNA methylation levels.  
827 Therefore, transcription and the production of eccDNA from this *Rider* copy is  
828 not regulated by DNA methylation. Consequently, eccDNA from *Rider\_07\_2*  
829 was not detected in *slnrpd1* despite drastic loss of CHH methylation.

830 Despite our efforts, we were unable to apply either drought or ABA  
831 treatment to the *slnrpd1* and *slnrpe1* mutants. In contrast to Arabidopsis  
832 [91,92], RdDM mutants in tomato are showing severe developmental defects  
833 and are sterile [47]. They are particularly difficult to maintain, precluding the  
834 application of stress treatments. Altogether, it appears that transcriptional  
835 control and reverse transcription of *Rider* copies occurs via multiple layers of  
836 regulation, possibly specific for individual *Rider* elements according to age,  
837 sequence or genomic location, that are targeted by parallel silencing  
838 pathways, including non-canonical RdDM [93,94].

839

#### 840 *Rider retrotransposons in other plant species*

841

842 The presence of *Rider* in tomato relatives as well as in more distantly related  
843 plant species has been described previously [33,44,46]. However, the *de*  
844 *novo* identification of *Rider* elements in the sampling provided here shows the  
845 distribution of the *Rider* family within plant species to be more complex than  
846 initially suggested. Surprisingly, mining for sequences with high similarity,  
847 overlapping more than 85% of the entire reference sequence of *Rider*,  
848 detected no full-length *Rider* elements in *Solanum pimpinellifolium* but in all  
849 other wild tomato species tested. Furthermore, the significant accumulation of  
850 only partial *Rider* copies in *Solanum pimpinellifolium*, the closest relative of  
851 tomato, does not match the established phylogeny of the *Solanaceae*. The  
852 cause of these patterns is unresolved but two scenarios can be envisaged.

853 First, the absence of full-length *Rider* elements may be due to the suboptimal  
854 quality of genome assembly that may exclude a significant proportion of highly  
855 repetitive sequences such as *Rider*. This is supported by the N50 values  
856 within the *Solanaceae*, where the quality of genome assemblies varies  
857 significantly between species, with *S. pimpinellifolium* showing the lowest  
858 (Table S8). An improved genome assembly would allow a refined analysis of  
859 *Rider* in this species. Alternatively, active *Rider* copies may have been lost in  
860 *S. pimpinellifolium* since the separation from the last common ancestor but  
861 not in the *S. lycopersicum* and *S. pennellii* lineages. The high-density of solo-  
862 LTRs and truncated elements in *S. pimpinellifolium* is in agreement with this  
863 hypothesis.

864 Comparing the sequences of *Rider* LTRs in the five tomato species,  
865 the unique occurrence of LTRs lacking most of the U3 region in *S.*  
866 *pimpinellifolium* suggests that loss of important regulatory sequences has  
867 impeded maintenance of intact *Rider* elements. Interestingly, part of the U3  
868 region missing in *S. pimpinellifolium* contains the CGCG box, which is  
869 involved in response to environmental signals [61], as well as a short CpG-  
870 island-like structure (position 52-155 bp on reference *Rider*). CpG islands are  
871 usually enriched 5' of transcriptionally active genes in vertebrates [95] and  
872 plants [96]. Despite the presence of truncated *Rider* LTRs, the occurrence of  
873 intact, full-length LTRs in other wild tomato species indicates that *Rider* is still  
874 potentially active in these genomes.

875 Altogether, our findings suggest that inter- and intra-species TE  
876 distribution can be uncoupled and that the evolution of TE families in present  
877 crop plants was more complex than initially anticipated. Finally, we have  
878 opened interesting perspectives for harnessing transposon activities in crop  
879 breeding. Potentially active TE families that react to environmental stimuli,  
880 such as *Rider*, provide an unprecedented opportunity to generate genetic and  
881 epigenetic variation from which desirable agronomical traits may emerge.  
882 Notably, rewiring of gene expression networks regulating the drought-stress  
883 responses of new *Rider* insertions is an interesting strategy to engineer  
884 drought-resilient crops.

885

886 **DATA AVAILABILITY**

887

888 SRAToolkit, v2.8.0 (<https://github.com/ncbi/sra-tools>) and Biomart 0.9.9000  
889 (<https://ropensci.github.io/biomart/index.html>) were used for data collection.

890

891 Phylogenetic trees were constructed using Geneious 9.1.8  
892 ([www.geneious.com](http://www.geneious.com)).

893

894 The *de novo* retrotransposon annotation pipeline *LTRpred* is available in the  
895 GitHub repository (<https://github.com/HajkD/LTRpred>).

896

897 *Rider* annotation and analysis pipeline is available in the GitHub repository  
898 (<https://github.com/HajkD/RIDER>).

899

900 Distribution of *Rider* elements was done using the R package *metablastr*  
901 (<https://github.com/HajkD/metablastr>).

902

903 DNA methylation levels were assessed using the R package DMRcaller  
904 (<http://bioconductor.org/packages/release/bioc/html/DMRcaller.html>).

905

906 Small RNA analysis was done using Trim Galore!  
907 ([www.bioinformatics.babraham.ac.uk/projects/trim\\_galore](http://www.bioinformatics.babraham.ac.uk/projects/trim_galore)), ShortStack v3.6  
908 (<https://github.com/MikeAxtell/ShortStack>) and GenomicRanges v3.8  
909 (<https://bioconductor.org/packages/release/bioc/html/GenomicRanges.html>).

910

911 Reference *Rider* nucleotide sequence (accession number EU195798) is  
912 available here (<https://www.ncbi.nlm.nih.gov/nuccore/EU195798>).

913

914 Public sequencing data used in this study are available at Sequence Read  
915 Archive (SRA) (<https://www.ncbi.nlm.nih.gov/sra/>) under accession numbers  
916 "SRP081115", "SRR4013319", "SRR4013316", "SRR4013314" and  
917 "SRR4013312".

918

919 **ACKNOWLEDGMENTS**

920

921 The authors thank all members of Dr. Paszkowski lab for fruitful discussions  
922 during the development of this project as well as the SLCU support staff.

923

924 *Author contributions:* MB and JP designed the study; MB performed  
925 experiments; MB, HGD and MC performed genomic data analyses; QG, SLG  
926 and DCB provided unpublished material and data; MB and JP wrote the paper  
927 with contributions from HGD and MC. All authors read and approved the final  
928 manuscript.

929

930

931 **FUNDING**

932

933 This work was supported by the European Research Council (EVOBREED)  
934 [322621] and the Gatsby Charitable Foundation [AT3273/GLE].

935

936

937 **CONFLICT OF INTEREST**

938

939 The authors declare no competing interests.

940

941

942 **REFERENCES**

943

- 944 1. Lisch D (2013) How important are transposons for plant evolution? *Nat*  
945 *Rev Genet* **14**: 49–61.
- 946 2. Lisch D (2009) Epigenetic Regulation of Transposable Elements in  
947 Plants. *Annu Rev Plant Biol* **60**: 43–66.
- 948 3. Slotkin RK, Martienssen R (2007) Transposable elements and the  
949 epigenetic regulation of the genome. *Nat Rev Genet* **8**: 272–285.
- 950 4. Zhang H, Zhu J-K (2011) RNA-directed DNA methylation. *Curr Opin*  
951 *Plant Biol* **14**: 142–147.
- 952 5. Rigal M, Mathieu O (2011) A ‘mille-feuille’ of silencing: Epigenetic

- 953 control of transposable elements. *Biochim Biophys Acta - Gene Regul*  
954 *Mech* **1809**: 452–458.
- 955 6. Law JA, Jacobsen SE (2010) Establishing, maintaining and modifying  
956 DNA methylation patterns in plants and animals. *Nat Rev Genet* **11**:  
957 204–220.
- 958 7. Matzke M, Kanno T, Huettel B, Daxinger L, Matzke AJM (2007) Targets  
959 of RNA-directed DNA methylation. *Curr Opin Plant Biol* **10**: 512–519.
- 960 8. Wendte JM, Pikaard CS (2017) The RNAs of RNA-directed DNA  
961 methylation. *Biochim Biophys Acta* **1860**: 140–148.
- 962 9. Mirouze M, Reinders J, Bucher E, Nishimura T, Schneeberger K,  
963 Ossowski S, Cao J, Weigel D, Paszkowski J, Mathieu O (2009)  
964 Selective epigenetic control of retrotransposition in Arabidopsis. *Nature*  
965 **461**: 1–5.
- 966 10. Kato M, Miura A, Bender J, Jacobsen SE, Kakutani T (2003) Role of CG  
967 and non-CG methylation in immobilization of transposons in  
968 Arabidopsis. *Curr Biol* **13**: 421–426.
- 969 11. Lanciano S, Carpentier MC, Llauro C, Jobet E, Robakowska-Hyzorek D,  
970 Lasserre E, Ghesquière A, Panaud O, Mirouze M (2017) Sequencing  
971 the extrachromosomal circular mobilome reveals retrotransposon  
972 activity in plants. *PLoS Genet* **13**: 1–20.
- 973 12. Hu L, Li N, Xu C, Zhong S, Lin X, Yang J, Zhou T, Yuliang A, Wu Y,  
974 Chen Y-R, et al. (2014) Mutation of a major CG methylase in rice  
975 causes genome-wide hypomethylation, dysregulated genome  
976 expression, and seedling lethality. *Proc Natl Acad Sci* **111**: 10642–  
977 10647.
- 978 13. Cheng C, Tarutani Y, Miyao A, Ito T, Yamazaki M, Sakai H, Fukai E,  
979 Hirochika H (2015) Loss of function mutations in the rice  
980 chromomethylase OsCMT3a cause a burst of transposition. *Plant J* **83**:  
981 1069–1081.
- 982 14. Miura A, Yonebayashi S, Watanabe K, Toyama T, Shimada H, Kakutani  
983 T (2001) Mobilization of transposons by a mutation abolishing full DNA  
984 methylation in Arabidopsis. *Nature* **411**: 212–214.
- 985 15. Lippman Z, Gendrel A-V, Black M, Vaughn MW, Dedhia N, McCombie  
986 WR, Lavine K, Mittal V, May B, Kasschau KD, et al. (2004) Role of

- 987 transposable elements in heterochromatin and epigenetic control.  
988 *Nature* **430**: 471–476.
- 989 16. Tsukahara S, Kobayashi A, Kawabe A, Mathieu O, Miura A, Kakutani T  
990 (2009) Bursts of retrotransposition reproduced in Arabidopsis. *Nature*  
991 **461**: 423–426.
- 992 17. Griffiths J, Catoni M, Iwasaki M, Paszkowski J (2018) Sequence-  
993 Independent Identification of Active LTR Retrotransposons in  
994 Arabidopsis. *Mol Plant* **11**: 508–511.
- 995 18. Tan F, Zhou C, Zhou Q, Zhou S, Yang W, Zhao Y, Li G, Zhou D-X  
996 (2016) Analysis of Chromatin Regulators Reveals Specific Features of  
997 Rice DNA Methylation Pathways. *Plant Physiol* **171**: 2041–2054.
- 998 19. Chuong EB, Elde NC, Feschotte C (2017) Regulatory activities of  
999 transposable elements: from conflicts to benefits. *Nat Rev Genet* **18**:  
1000 71–86.
- 1001 20. McClintock B (1951) Chromosome Organization and Genic Expression.  
1002 *Cold Spring Harb Symp Quant Biol* **16**: 13–47.
- 1003 21. Grandbastien MA (1998) Activation of plant retrotransposons under  
1004 stress conditions. *Trends Plant Sci* **3**: 181–187.
- 1005 22. Grandbastien MA, Audeon C, Bonnivard E, Casacuberta JM, Chalhoub  
1006 B, Costa APP, Le QH, Melayah D, Petit M, Poncet C, et al. (2005)  
1007 Stress activation and genomic impact of Tnt1 retrotransposons in  
1008 Solanaceae. *Cytogenet Genome Res* **110**: 229–241.
- 1009 23. Butelli E, Licciardello C, Zhang Y, Liu J, Mackay S, Bailey P, Reforgiato-  
1010 Recupero G, Martin C (2012) Retrotransposons Control Fruit-Specific,  
1011 Cold-Dependent Accumulation of Anthocyanins in Blood Oranges. *Plant*  
1012 *Cell* **24**: 1242–1255.
- 1013 24. Johns M a, Mottinger J, Freeling M (1985) A low copy number, copia-  
1014 like transposon in maize. *EMBO J* **4**: 1093–1101.
- 1015 25. Cho J, Benoit M, Catoni M, Drost H-G, Brestovitsky A, Oosterbeek M,  
1016 Paszkowski J (2018) Sensitive detection of pre-integration  
1017 intermediates of long terminal repeat retrotransposons in crop plants.  
1018 *Nat Plants* 317479.
- 1019 26. Tittel-Elmer M, Bucher E, Broger L, Mathieu O, Paszkowski J, Vaillant I  
1020 (2010) Stress-Induced Activation of Heterochromatic Transcription.



- 1021 *PLoS Genet* **6**: e1001175.
- 1022 27. Pecinka A, Dinh HQ, Baubec T, Rosa M, Lettner N, Scheid OM (2010)
- 1023 Epigenetic Regulation of Repetitive Elements Is Attenuated by
- 1024 Prolonged Heat Stress in *Arabidopsis*. *Plant Cell* **22**: 3118–3129.
- 1025 28. Ito H, Gaubert H, Bucher E, Mirouze M, Vaillant I, Paszkowski J (2011)
- 1026 An siRNA pathway prevents transgenerational retrotransposition in
- 1027 plants subjected to stress. *Nature* **472**: 115–119.
- 1028 29. Gaubert H, Sanchez DH, Drost H-G, Paszkowski J (2017)
- 1029 Developmental Restriction of Retrotransposition Activated in
- 1030 *Arabidopsis* by Environmental Stress. *Genetics* **207**: 813–821.
- 1031 30. Tenaillon MI, Hollister JD, Gaut BS (2010) A triptych of the evolution of
- 1032 plant transposable elements. *Trends Plant Sci* **15**: 471–478.
- 1033 31. Sato S, Tabata S, Hirakawa H, Asamizu E, Shirasawa K, Isobe S,
- 1034 Kaneko T, Nakamura Y, Shibata D, Aoki K, et al. (2012) The tomato
- 1035 genome sequence provides insights into fleshy fruit evolution. *Nature*
- 1036 **485**: 635–641.
- 1037 32. Xiao H, Jiang N, Schaffner E, Stockinger EJ, van der Knaap E (2008) A
- 1038 Retrotransposon-Mediated Gene Duplication Underlies Morphological
- 1039 Variation of Tomato Fruit. *Science (80- )* **319**: 1527–1530.
- 1040 33. Jiang N, Gao D, Xiao H, van der Knaap E (2009) Genome organization
- 1041 of the tomato sun locus and characterization of the unusual
- 1042 retrotransposon Rider. *Plant J* **60**: 181–193.
- 1043 34. Rodríguez GR, Muñoz S, Anderson C, Sim S-C, Michel A, Causse M,
- 1044 Gardener BBM, Francis D, van der Knaap E (2011) Distribution of SUN,
- 1045 OVATE, LC, and FAS in the tomato germplasm and the relationship to
- 1046 fruit shape diversity. *Plant Physiol* **156**: 275–285.
- 1047 35. Reynard GB (1961) New source of the j2 gene governing Jointless
- 1048 pedicel in tomato. *Science (80- )* **134**: 2102.
- 1049 36. Rick CM (1956) A new jointless gene from the Galapagos L.
- 1050 *pimpinellifolium*. *TGC Rep* 23.
- 1051 37. Rick CM (1956) Genetic and Systematic Studies on Accessions of
- 1052 *Lycopersicon* from the Galapagos Islands. *Am J Bot* **43**: 687.
- 1053 38. Soyk S, Lemmon ZH, Oved M, Fisher J, Liberatore KL, Park SJ, Goren
- 1054 A, Jiang K, Ramos A, van der Knaap E, et al. (2017) Bypassing

- 1055 Negative Epistasis on Yield in Tomato Imposed by a Domestication  
1056 Gene. *Cell* **169**: 1142–1155.e12.
- 1057 39. Fray RG, Grierson D (1993) Identification and genetic analysis of  
1058 normal and mutant phytoene synthase genes of tomato by sequencing,  
1059 complementation and co-suppression. *Plant Mol Biol* **22**: 589–602.
- 1060 40. Jiang N, Visa S, Wu S, Knaap E Van Der (2012) *Rider Transposon*  
1061 *Insertion and Phenotypic Change in Tomato*. Springer Berlin  
1062 Heidelberg, Berlin, Heidelberg.
- 1063 41. Busch BL, Schmitz G, Rossmann S, Piron F, Ding J, Bendahmane A,  
1064 Theres K (2011) Shoot Branching and Leaf Dissection in Tomato Are  
1065 Regulated by Homologous Gene Modules. *Plant Cell* **23**: 3595–3609.
- 1066 42. Brown JC, Chaney RL, Ambler JE (1971) A New Tomato Mutant  
1067 Inefficient in the Transport of Iron. *Physiol Plant* **25**: 48–53.
- 1068 43. Ling H-Q, Bauer P, Bereczky Z, Keller B, Ganai M (2002) The tomato  
1069 fer gene encoding a bHLH protein controls iron-uptake responses in  
1070 roots. *Proc Natl Acad Sci U S A* **99**: 13938–13943.
- 1071 44. Cheng X, Zhang D, Cheng Z, Keller B, Ling H-Q (2009) A New Family  
1072 of Ty1-copia-Like Retrotransposons Originated in the Tomato Genome  
1073 by a Recent Horizontal Transfer Event. *Genetics* **181**: 1183–1193.
- 1074 45. Wang Y, Diehl A, Wu F, Vrebalov J, Giovannoni J, Siepel A, Tanksley  
1075 SD (2008) Sequencing and comparative analysis of a conserved  
1076 syntenic segment in the Solanaceae. *Genetics* **180**: 391–408.
- 1077 46. Gilbert C, Feschotte C (2018) Horizontal acquisition of transposable  
1078 elements and viral sequences: patterns and consequences. *Curr Opin*  
1079 *Genet Dev* **49**: 15–24.
- 1080 47. Gouil Q, Baulcombe DC (2016) DNA Methylation Signatures of the  
1081 Plant Chromomethyltransferases. *PLoS Genet* **12**: 1–17.
- 1082 48. Tanksley SD, Ganai MW, Prince JP, De Vicente MC, Bonierbale MW,  
1083 Broun P, Fulton TM, Giovannoni JJ, Grandillo S, Martin GB, et al.  
1084 (1992) High density molecular linkage maps of the tomato and potato  
1085 genomes. *Genetics* **132**: 1141–1160.
- 1086 49. Catoni M, Griffiths J, Becker C, Zabet NR, Bayon C, Dapp M,  
1087 Lieberman-Lazarovich M, Weigel D, Paszkowski J (2017) DNA  
1088 sequence properties that predict susceptibility to epiallelic switching.

- 1089 *EMBO J* **36**: 617–628.
- 1090 50. Catoni M, Tsang JM, Greco AP, Zabet NR (2018) DMRcaller: a versatile  
1091 R/Bioconductor package for detection and visualization of differentially  
1092 methylated regions in CpG and non-CpG contexts. *Nucleic Acids Res*  
1093 1–11.
- 1094 51. Lawrence M, Huber W, Pagès H, Aboyoun P, Carlson M, Gentleman R,  
1095 Morgan MT, Carey VJ (2013) Software for Computing and Annotating  
1096 Genomic Ranges. *PLoS Comput Biol* **9**: 1–10.
- 1097 52. Pruitt KD, Tatusova T, Maglott DR (2007) NCBI reference sequences  
1098 (RefSeq): a curated non-redundant sequence database of genomes,  
1099 transcripts and proteins. *Nucleic Acids Res* **35**: D61-5.
- 1100 53. Drost H-G, Paszkowski J (2017) Biomart: genomic data retrieval with  
1101 R. *Bioinformatics* **33**: 1216–1217.
- 1102 54. Fernandez-Pozo N, Menda N, Edwards JD, Saha S, Tecle IY, Strickler  
1103 SR, Bombarely A, Fisher-York T, Pujar A, Foerster H, et al. (2015) The  
1104 Sol Genomics Network (SGN)—from genotype to phenotype to  
1105 breeding. *Nucleic Acids Res* **43**: D1036–D1041.
- 1106 55. Lowe TM, Eddy SR (1996) TRNAscan-SE: A program for improved  
1107 detection of transfer RNA genes in genomic sequence. *Nucleic Acids*  
1108 *Res* **25**: 955–964.
- 1109 56. Michaud M, Cognat V, Duchêne AM, Maréchal-Drouard L (2011) A  
1110 global picture of tRNA genes in plant genomes. *Plant J* **66**: 80–93.
- 1111 57. Finn RD, Coggill P, Eberhardt RY, Eddy SR, Mistry J, Mitchell AL,  
1112 Potter SC, Punta M, Qureshi M, Sangrador-Vegas A, et al. (2016) The  
1113 Pfam protein families database: towards a more sustainable future.  
1114 *Nucleic Acids Res* **44**: D279–D285.
- 1115 58. Rognes T, Flouri T, Nichols B, Quince C, Mahé F (2016) VSEARCH: a  
1116 versatile open source tool for metagenomics. *PeerJ* **4**: e2584.
- 1117 59. Altschul SF, Gish W, Miller W, Myers EW, Lipman DJ (1990) Basic local  
1118 alignment search tool. *J Mol Biol* **215**: 403–410.
- 1119 60. Galindo-González L, Mhiri C, Deyholos MK, Grandbastien MA (2017)  
1120 LTR-retrotransposons in plants: Engines of evolution. *Gene* **626**: 14–25.
- 1121 61. Yang T, Poovaiah BW (2002) A calmodulin-binding/CGCG box DNA-  
1122 binding protein family involved in multiple signaling pathways in plants.

- 1123 *J Biol Chem* **277**: 45049–45058.
- 1124 62. Abe H, Urao T, Ito T, Seki M, Shinozaki K, Yamaguchi-Shinozaki K  
1125 (2003) Arabidopsis AtMYC2 (bHLH) and AtMYB2 (MYB) function as  
1126 transcriptional activators in abscisic acid signaling. *Plant Cell* **15**: 63–78.
- 1127 63. Yang A, Dai X, Zhang W-H (2012) A R2R3-type MYB gene, OsMYB2, is  
1128 involved in salt, cold, and dehydration tolerance in rice. *J Exp Bot* **63**:  
1129 2541–2556.
- 1130 64. Gómez-Porras JL, Riaño-Pachón D, Dreyer I, Mayer JE, Mueller-  
1131 Roeber B (2007) Genome-wide analysis of ABA-responsive elements  
1132 ABRE and CE3 reveals divergent patterns in Arabidopsis and rice. *BMC*  
1133 *Genomics* **8**: 260.
- 1134 65. Timmerhaus G, Hanke ST, Buchta K, Rensing SA (2011) Prediction and  
1135 validation of promoters involved in the abscisic acid response in  
1136 *Physcomitrella patens*. *Mol Plant* **4**: 713–729.
- 1137 66. Vishwakarma K, Upadhyay N, Kumar N, Yadav G, Singh J, Mishra RK,  
1138 Kumar V, Verma R, Upadhyay RG, Pandey M, et al. (2017) Abscisic  
1139 Acid Signaling and Abiotic Stress Tolerance in Plants: A Review on  
1140 Current Knowledge and Future Prospects. *Front Plant Sci* **08**: 1–12.
- 1141 67. Sagi M, Fluhr R, Lips SH (1999) Aldehyde oxidase and xanthine  
1142 dehydrogenase in a flacca tomato mutant with deficient abscisic acid  
1143 and wilted phenotype. *Plant Physiol* **120**: 571–578.
- 1144 68. Parry AD, Neill SJ, Horgan R (1988) Xanthoxin levels and metabolism  
1145 in the wild-type and wilted mutants of tomato. *Planta* **173**: 397–404.
- 1146 69. Burbidge A, Grieve TM, Jackson A, Thompson A, McCarty DR, Taylor IB  
1147 (1999) Characterization of the ABA-deficient tomato mutant notabilis  
1148 and its relationship with maize Vp14. *Plant J* **17**: 427–431.
- 1149 70. Harrison E, Burbidge A, Okyere JP, Thompson AJ, Taylor IB (2011)  
1150 Identification of the tomato ABA-deficient mutant sitiens as a member of  
1151 the ABA-aldehyde oxidase gene family using genetic and genomic  
1152 analysis. *Plant Growth Regul* **64**: 301–309.
- 1153 71. Maruyama KY, Todaka DA, Mizoi JU, Yoshida TA, Kidokoro SA,  
1154 Matsukura SA, Takasaki HI, Sakurai TE, Yamamoto YOY, Yoshiwara  
1155 KY (2012) Identification of Cis -Acting Promoter Elements in Cold- and  
1156 Dehydration- Induced Transcriptional Pathways in Arabidopsis , Rice ,

- 1157 and Soybean. *DNA Res* **19**: 37–49.
- 1158 72. Perlman PS, Boeke JD (2004) Ring around the retroelement. *Science*  
1159 **303**: 182–184.
- 1160 73. Kilzer JM, Stracker T, Beitzel B, Meek K, Weitzman M, Bushman FD  
1161 (2003) Roles of host cell factors in circularization of retroviral DNA.  
1162 *Virology* **314**: 460–467.
- 1163 74. Li L, Olvera JM, Yoder KE, Mitchell RS, Butler SL, Lieber M, Martin SL,  
1164 Bushman FD (2001) Role of the non-homologous DNA end joining  
1165 pathway in the early steps of retroviral infection. *EMBO J* **20**: 3272–  
1166 3281.
- 1167 75. Flavell AJ, Ish-Horowicz D (1981) Extrachromosomal circular copies of  
1168 the eukaryotic transposable element copia in cultured *Drosophila* cells.  
1169 *Nature* **292**: 591–595.
- 1170 76. Flavell AJ, Ish-horowicz D (1981) Extrachromosomal circular copies of  
1171 the eukaryotic transposable element copia in cultured *Drosophila* cells.  
1172 *Nature* **292**: 591–595.
- 1173 77. Tam SM, Causse M, Garchery C, Burck H, Mhiri C, Grandbastien M-A  
1174 (2007) The distribution of copia-type retrotransposons and the  
1175 evolutionary history of tomato and related wild species. *J Evol Biol* **20**:  
1176 1056–1072.
- 1177 78. Yin H, Liu J, Xu Y, Liu X, Zhang S, Ma J, Du J (2013) TARE1, a  
1178 Mutated Copia-Like LTR Retrotransposon Followed by Recent Massive  
1179 Amplification in Tomato. *PLoS One* **8**: e68587.
- 1180 79. Wang Y, Tang X, Cheng Z, Mueller L, Giovannoni J, Tanksley SD  
1181 (2006) Euchromatin and pericentromeric heterochromatin: comparative  
1182 composition in the tomato genome. *Genetics* **172**: 2529–2540.
- 1183 80. Cavrak V V., Lettner N, Jamge S, Kosarewicz A, Bayer LM, Mittelsten  
1184 Scheid O (2014) How a Retrotransposon Exploits the Plant's Heat  
1185 Stress Response for Its Activation. *PLoS Genet* **10**: e1004115.
- 1186 81. Strand DJ, Mcdonald JF (1985) Copia is transcriptionally responsive to  
1187 environmental stress. *Nucleic Acids Res* **13**: 4401–4410.
- 1188 82. Li Z, Peng R, Tian Y, Han H, Xu J, Yao Q (2016) Genome-Wide  
1189 Identification and Analysis of the MYB Transcription Factor Superfamily  
1190 in *Solanum lycopersicum*. *Plant Cell Physiol* **57**: 1657–1677.

- 1191 83. Seo PJ, Xiang F, Qiao M, Park J-Y, Lee YN, Kim S-G, Lee Y-H, Park  
1192 WJ, Park C-M (2009) The MYB96 transcription factor mediates abscisic  
1193 acid signaling during drought stress response in Arabidopsis. *Plant*  
1194 *Physiol* **151**: 275–289.
- 1195 84. Zhu N, Cheng S, Liu X, Du H, Dai M, Zhou D-X, Yang W, Zhao Y (2015)  
1196 The R2R3-type MYB gene OsMYB91 has a function in coordinating  
1197 plant growth and salt stress tolerance in rice. *Plant Sci* **236**: 146–156.
- 1198 85. Sugimoto K, Takeda S, Hirochika H (2000) MYB-related transcription  
1199 factor NtMYB2 induced by wounding and elicitors is a regulator of the  
1200 tobacco retrotransposon Tto1 and defense-related genes. *Plant Cell* **12**:  
1201 2511–2528.
- 1202 86. Corem S, Doron-Faigenboim A, Jouffroy O, Maumus F, Arazi T, Bouché  
1203 N (2018) Redistribution of CHH Methylation and Small Interfering RNAs  
1204 across the Genome of Tomato ddm1 Mutants. *Plant Cell* **30**:  
1205 tpc.00167.2018.
- 1206 87. Kravchik M, Damodharan S, Stav R, Arazi T (2014) Generation and  
1207 characterization of a tomato DCL3-silencing mutant. *Plant Sci* **221–222**:  
1208 81–89.
- 1209 88. Panda K, Ji L, Neumann DA, Daron J, Schmitz RJ, Slotkin RK (2016)  
1210 Full-length autonomous transposable elements are preferentially  
1211 targeted by expression-dependent forms of RNA-directed DNA  
1212 methylation. *Genome Biol* **17**: 170.
- 1213 89. McCue AD, Panda K, Nuthikattu S, Choudury SG, Thomas EN, Slotkin  
1214 RK (2015) ARGONAUTE 6 bridges transposable element mRNA-  
1215 derived siRNAs to the establishment of DNA methylation. *EMBO J* **34**:  
1216 20–35.
- 1217 90. Nuthikattu S, McCue AD, Panda K, Fultz D, DeFraia C, Thomas EN,  
1218 Slotkin RK (2013) The Initiation of Epigenetic Silencing of Active  
1219 Transposable Elements Is Triggered by RDR6 and 21-22 Nucleotide  
1220 Small Interfering RNAs. *Plant Physiol* **162**: 116–131.
- 1221 91. Herr AJ, Jensen MB, Dalmay T, Baulcombe DC (2005) RNA  
1222 polymerase IV directs silencing of endogenous DNA. *Science (80- )*  
1223 **308**: 118–120.
- 1224 92. Kanno T, Huettel B, Mette MF, Aufsatz W, Jaligot E, Daxinger L, Kreil

- 1225 DP, Matzke M, Matzke AJM (2005) Atypical RNA polymerase subunits  
1226 required for RNA-directed DNA methylation. *Nat Genet* **37**: 761–765.
- 1227 93. Cuerda-Gil D, Slotkin RK (2016) Non-canonical RNA-directed DNA  
1228 methylation. *Nat Plants* **2**: 16163.
- 1229 94. Matzke M a, Moshier R a (2014) RNA-directed DNA methylation: an  
1230 epigenetic pathway of increasing complexity. *Nat Rev Genet* **15**: 394–  
1231 408.
- 1232 95. Deaton A, Bird A (2011) CpG islands and the regulation of transcription.  
1233 *Genes Dev* **25**: 1010–1022.
- 1234 96. Ashikawa I (2001) Gene-associated CpG islands in plants as revealed  
1235 by analyses of genomic sequences. *Plant J* **26**: 617–625.
- 1236

1237 **FIGURE LEGENDS**

1238

1239

1240 **Figure 1: Chromosomal location and phylogenetic relationships of *de***

1241 ***novo* annotated full-length *Rider* elements**

1242

1243 (A) Chromosomal positions of 71 *de novo* annotated full-length *Rider*  
1244 elements in the SL3.0 genome. *Rider* copies are marked as coloured vertical  
1245 bars, with colours reflecting similarity between LTRs for each element. Dark  
1246 grey areas delimitate the centromeres, light grey pericentromeric  
1247 heterochromatin, and white euchromatin. (B) Phylogenetic relationship of the  
1248 71 *de novo* annotated *Rider* elements. The phylogenetic tree was constructed  
1249 using the neighbour-joining method on nucleotide sequences of each *Rider*  
1250 copy.

1251

1252 **Figure 2: *Rider* activation is stimulated by drought and ABA**

1253

1254 (A) Identification of *cis*-regulatory elements (CREs) within *Rider* LTRs. *Rider*  
1255 LTR U3, R and U5 regions are marked, as well as neighbouring Target Site  
1256 Duplication (TSD) and Primer Binding Site (PBS) sequences. CREs are  
1257 marked as coloured vertical bars; their bp positions are given in brackets. (B-  
1258 C) Quantification of *Rider* RNA levels by RT-qPCR in tomato seedlings after  
1259 (B) drought stress or (C) mannitol and NaCl treatments. Histograms show  
1260 normalized expression relative to Control, +/- SEM from two to three biological  
1261 replicates. \* $P < 0.05$ , two-sided Student's *t*-test. (D) Quantification of *Rider*  
1262 RNA levels by RT-qPCR in leaves of drought-stressed tomato wild-type  
1263 plants, *flc*, *not* and *sit* mutants. Histograms show normalized expression  
1264 relative to WT Control, +/- SEM from two biological replicates. \* $P < 0.05$   
1265 denotes difference compared to wild-type control; #  $P < 0.05$  denotes difference  
1266 compared to wild-type drought plants, two-sided Student's *t*-test. (E)  
1267 Quantification of *Rider* RNA levels by RT-qPCR in tomato seedlings after ABA  
1268 treatment. Histograms show normalized expression relative to Control, +/-  
1269 SEM from two to three biological replicates. \* $P < 0.05$ , \*\*\* $P < 0.001$ , two-sided  
1270 Student's *t*-test.

1271



1272

1273 **Figure 3: Accumulation of *Rider* transcripts in tomato plants deficient in**  
1274 **epigenetic regulation**

1275

1276 (A) Quantification of *Rider* RNA levels by RT-qPCR in tomato seedlings  
1277 treated with 5-azacytidine and/or ABA. Histograms show normalized  
1278 expression relative to Control, +/- SEM from two to three biological replicates.  
1279 \* $P < 0.05$ , two-sided Student's *t*-test.

1280 (B) Abundance of siRNAs at *Rider* elements in wild type, *slnrpd1* and *slnrpe1*.  
1281 Data are expressed as siRNA reads per kb per million mapped reads and  
1282 represent average normalized siRNA counts on *Rider* elements +/- SD from  
1283 71 *de novo* annotated *Rider* copies. \*\*\* $P < 0.001$ , two-sided Student's *t*-test.

1284 (C) Quantification of *Rider* RNA by RT-qPCR in *slnrpd1* and *slnrpe1*.  
1285 Histograms show normalized expression relative to WT, +/- SEM from two to  
1286 four biological replicates. \* $P < 0.05$ , two-sided Student's *t*-test.

1287

1288 **Figure 4: Accumulation of *Rider* extrachromosomal DNA in drought-**  
1289 **stressed plants and in *slnrpd1* and *slnrpe1* mutants**

1290

1291 (A) Assay by inverse PCR of *Rider* extrachromosomal circular DNA in  
1292 drought-stressed wild-type plants and stressed *sit* mutants. Primer localization  
1293 shown on the left (grey bar: *Rider* element, black box: LTR, arrowheads: PCR  
1294 primers). Upper gel: specific PCR amplification of *Rider* circles after DNase  
1295 treatment, lower gel: control PCR for *Rider* detection without DNase

1296 treatment. (B) Quantification of *Rider* DNA copy number, including both  
1297 chromosomal and extrachromosomal copies, by qPCR in leaves of tomato  
1298 plants subjected to drought-stress. Histograms show normalized expression  
1299 +/- SEM from two to three biological replicates. \* $P < 0.05$ , two-sided Student's

1300 *t*-test. (C) Assay by inverse PCR of *Rider* extrachromosomal circular DNA in  
1301 *slnrpd1* and *slnrpe1* leaves. Upper gel: PCR amplification of *Rider* circles after  
1302 DNase treatment, lower gel: control PCR for *Rider* detection without DNase

1303 treatment. (D) Quantification of *Rider* DNA copy number, including both  
1304 chromosomal and extrachromosomal copies, by qPCR in *slnrpd1* and *slnrpe1*  
1305 leaves. Histograms show normalized expression +/- SEM from two biological

1306 replicates. \* $P < 0.05$ , two-sided Student's *t*-test. (E) Quantification of CHH DNA  
1307 methylation levels at *Rider\_08\_3* and *Rider\_07\_2* in wild type, *slnrpd1* and  
1308 *slnrpe1*. Levels expressed as % of methylated CHH sites. (F) Normalized  
1309 siRNA count of 21-22-nt and 24-nt siRNAs at *Rider\_08\_3* and *Rider\_07\_2* in  
1310 wild type, *slnrpd1* and *slnrpe1*. Data are expressed as siRNA reads per kb per  
1311 million mapped reads.

1312

1313 **Figure 5: Distribution of *Rider* in other *Solanaceae* species**

1314

1315 (A) *In silico* identification of *Rider* elements in *Solanaceae* species based on  
1316 the density of high homology BLAST hits over the full-length reference *Rider*  
1317 sequence. (B) Alignment length of high homology BLAST hits obtained in (A).  
1318 (C) *In silico* identification of *Rider* elements in *Solanaceae* species based on  
1319 the density of high homology BLAST hits over the reference *Rider* LTR  
1320 sequence. (D) Alignment length of high homology BLAST hits obtained in (C).  
1321 Left panels (A) and (C): phylogenetic trees of the species examined.

1322 **TABLES LEGENDS**

1323

1324 **Table 1: Distribution of *de novo* annotated *Rider* elements based on**  
1325 **chromatin context**

1326

1327 **Table 2: Distribution of *de novo* annotated *Rider* elements based on**  
1328 **gene proximity**

1329

1330

1331 **SUPPLEMENTARY FIGURE LEGENDS**

1332

1333 **Figure S1: Distribution of 71 *de novo* annotated *Rider* elements based**  
1334 **on LTR similarity and chromatin context**

1335

1336 (A) Age distribution of total *Rider* elements based on LTR similarity and  
1337 corresponding classes. (B) Age distribution of *Rider* elements inserted in  
1338 heterochromatic (HC) and euchromatic (EC) regions based on LTR similarity.

1339

1340 **Figure S2: *Rider* transcripts levels are unaffected by cold stress**

1341

1342 (A-D) Quantification of *SIASR1* RNA levels by RT-qPCR in wild-type tomato  
1343 seedlings after (A) drought stress (B) mannitol, (C) NaCl or (D) ABA  
1344 treatments. (E) Quantification of *SIASR1* RNA levels in leaves of drought-  
1345 stressed tomato wild-type plants, *flc*, *not* and *sit* mutants. (F) Quantification of  
1346 *SIASR1* RNA levels by RT-qPCR in wild-type tomato seedlings after 5-  
1347 azacytidine and ABA treatments. (G) Quantification of *Rider* RNA levels by  
1348 RT-qPCR in wild-type tomato seedlings after cold stress. Histograms show  
1349 normalized expression +/- SEM from three to five biological replicates.

1350

1351 **Figure S3: Distribution of siRNAs and DNA methylation within *Rider***  
1352 **sub-groups**

1353

1354 (A) 21-22-nt and (B) 24-nt siRNAs normalized counts at distinct *Rider* sub-  
1355 groups in wild type, wild type with *CAS9*, *slnrpd1* and *slnrpe1*. *Rider* elements  
1356 are classified based on LTR similarity (80-95%, 95-98% and 98-100%), while  
1357 *Rider* (Euchromatin) denotes copies located on euchromatic arms and *Rider*  
1358 (Heterochromatin) copies located in pericentromeric heterochromatin. Data  
1359 are expressed as siRNA reads per kb per million mapped reads, and  
1360 represent average normalized siRNA counts on *Rider* elements +/- SD from  
1361 *Rider* copies in the sub-group. (C) Quantification of DNA methylation levels in  
1362 the CG, CHG and CHH contexts at *Rider* in wild type, *slnrpd1* and *slnrpe1*.  
1363 The levels are averages of DNA methylation (%) in each context over the 71  
1364 *de novo* annotated *Rider* copies. (D) Quantification of CHH DNA methylation

1365 levels at *Rider* sub-groups in wild type, *slnrpd1* and *slnrpe1*. The levels are  
1366 averages of DNA methylation (%) in the CHH context over *Rider* sub-groups.

1367

1368 **Figure S4: Distinct *Rider* copies contribute to the production of**

1369 **extrachromosomal circular DNA**

1370

1371 Comparison of the LTR nucleotide sequence from *Rider* extrachromosomal  
1372 circular DNA detected after drought, or in *slnrpd1* (A) or *slnrpe1* (B), with the  
1373 reference *Rider* LTR using EMBOSS Needle  
1374 ([www.ebi.ac.uk/Tools/psa/emboss\\_needle](http://www.ebi.ac.uk/Tools/psa/emboss_needle)). CREs are marked as coloured  
1375 boxes. (C) Quantification of CHH DNA methylation levels at LTRs and body of  
1376 *Rider\_08\_3* and *Rider\_07\_2* in wild type, *slnrpd1* and *slnrpe1*. Levels  
1377 expressed as % of methylated CHH sites. (D-E) Quantification of CG (D) and  
1378 CHG (E) DNA methylation levels at *Rider\_08\_3* and *Rider\_07\_2* in wild type,  
1379 *slnrpd1* and *slnrpe1*. Levels expressed as % of methylated sites. (F-G)  
1380 Normalized siRNA count of 24-nt (F) and 21-22-nt (G) siRNAs at LTRs and  
1381 body of *Rider\_08\_3* and *Rider\_07\_2* in wild type, *slnrpd1* and *slnrpe1*. Data  
1382 are expressed as siRNA reads per kb per million mapped reads.

1383

1384 **Figure S5: Characterization of *Rider* sub-populations in *Solanaceae***

1385 **based on LTR sequences**

1386

1387 Coverage over reference *Rider* LTR of high homology sequences identified by  
1388 BLAST in Figure 5C. Sequences classified as “long LTR” were selected by  
1389 filtering for BLAST hits with alignment lengths between 350-450 bp and >50%  
1390 sequence and length homology to reference *Rider*. Sequences classified as  
1391 “short LTR” were selected by filtering for BLAST hits with alignment lengths  
1392 between 150-300 bp and >50% sequence and length homology to reference  
1393 *Rider*.

1394

1395 **Figure S6: Identification of *Rider* homologs in 14 plant species**

1396

1397 *In silico* identification of *Rider* homologs in 14 plant species based on the  
1398 density of high homology BLAST hits over the full-length reference *Rider*

1399 sequence (left) and alignment length of BLAST hits obtained (right). Species  
1400 are ordered by evolutionary distance to *Solanum lycopersicum* from  
1401 [www.timetree.org](http://www.timetree.org), [www.genome.jp](http://www.genome.jp) and Supplementary References.

1402

1403 **Figure S7: Non-Solanaceae *Rider* homologs lack LTR sequence**  
1404 **conservation**

1405

1406 *In silico* identification of *Rider* LTR homologs in 14 plant species based on the  
1407 density of high homology BLAST hits over the reference *Rider* LTR sequence  
1408 only. Species are ordered by evolutionary distance to *Solanum lycopersicum*  
1409 from [www.timetree.org](http://www.timetree.org), [www.genome.jp](http://www.genome.jp) and Supplementary References.

1410

1411 **SUPPLEMENTARY TABLES LEGENDS**

1412

1413 **Table S1: Primers used in this study**

1414

1415 **Table S2: List of the 110 plant species used for the large-scale *Rider***

1416 **BLAST search**

1417

1418 **Table S3: Identification and enrichment analysis of *cis*-regulatory**

1419 **elements in *Rider* LTRs**

1420

1421 **Table S4: Enrichment analysis of *cis*-regulatory elements in *Rider* LTRs**

1422 **in four *Solanaceae* species**

1423

1424 **Table S5: *De novo* annotation of LTR retrotransposons in the SL3.0**

1425 **genome by *LTRpred***

1426

1427 **Table S6: Patristic distances between 71 *de novo* annotated *Rider***

1428 **copies**

1429

1430 **Table S7: Presence of *cis*-regulatory elements in individual *Rider* copies**

1431

1432 **Table S8: N50 metric for six *Solanaceae* species**

1433

1434

1435 **SUPPLEMENTARY REFERENCES**

1436

1437 Harkess, A. *et al.* The asparagus genome sheds light on the origin and  
1438 evolution of a young y chromosome. *Nat. Commun.* **8**, (2017).

1439

1440 Zou, C. *et al.* A high-quality genome assembly of quinoa provides insights into  
1441 the molecular basis of salt bladder-based salinity tolerance and the  
1442 exceptional nutritional value. *Cell Res.* **27**, 1327–1340 (2017).

1443



a

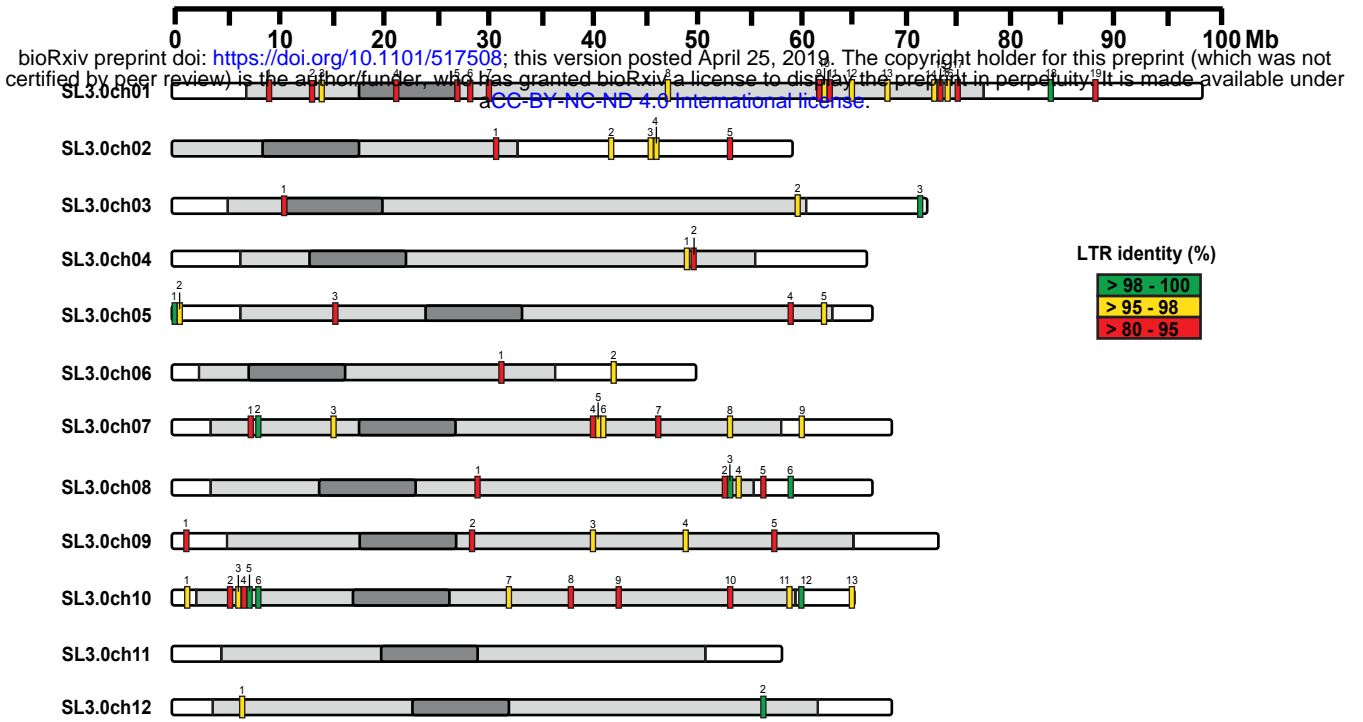

b

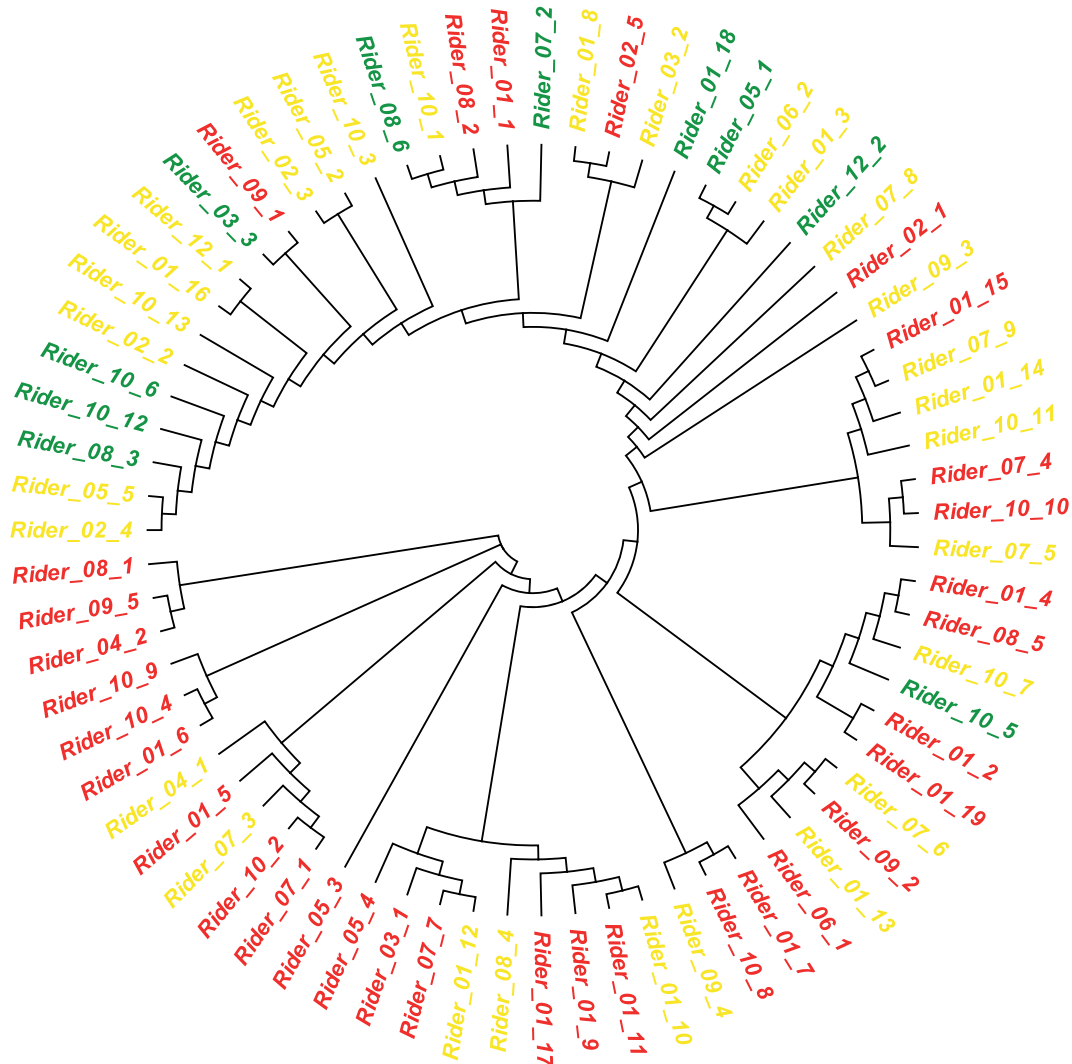

Figure 1

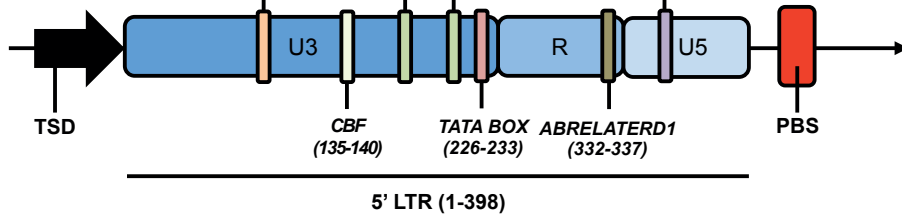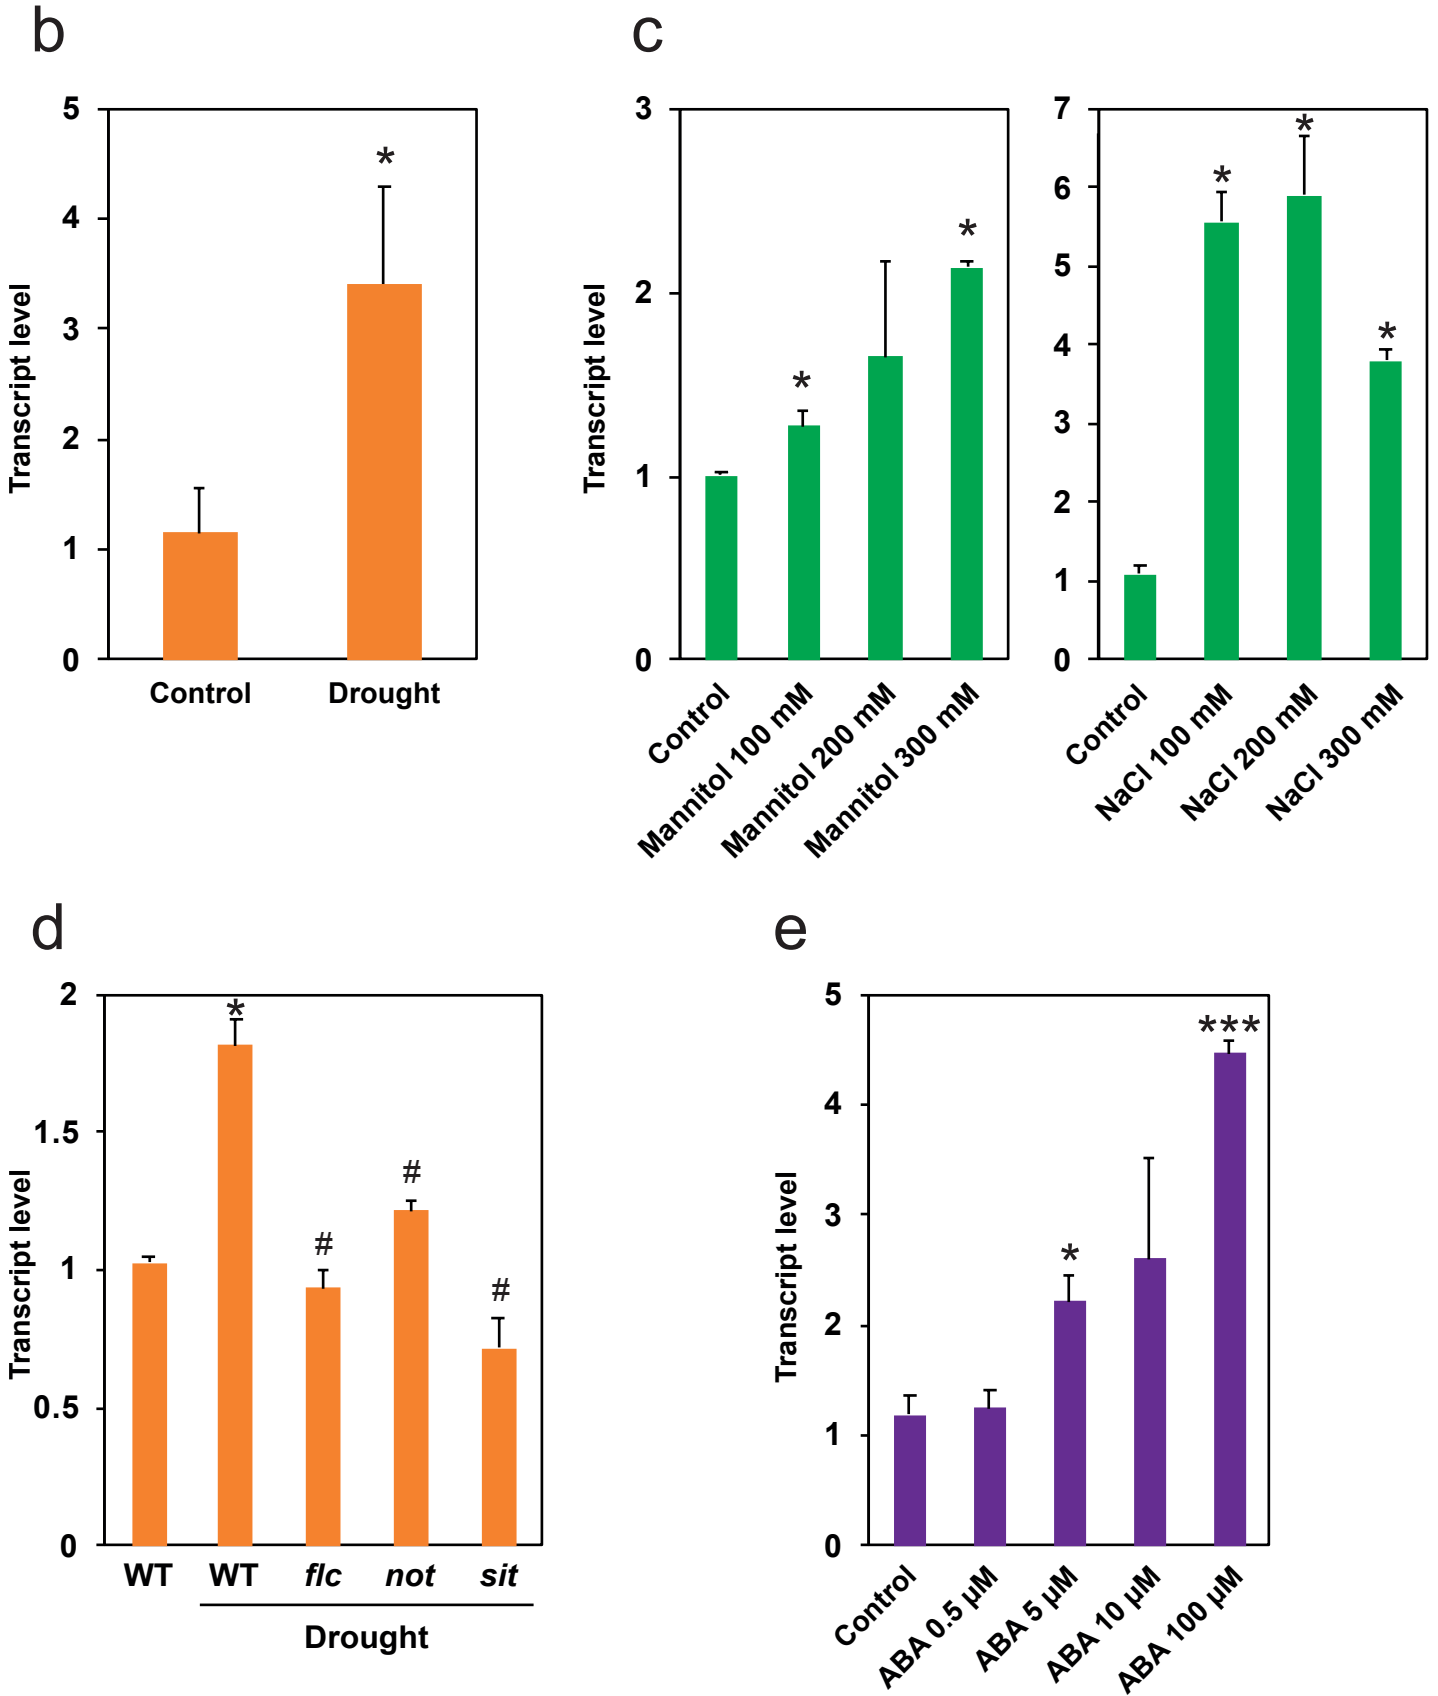

Figure 2

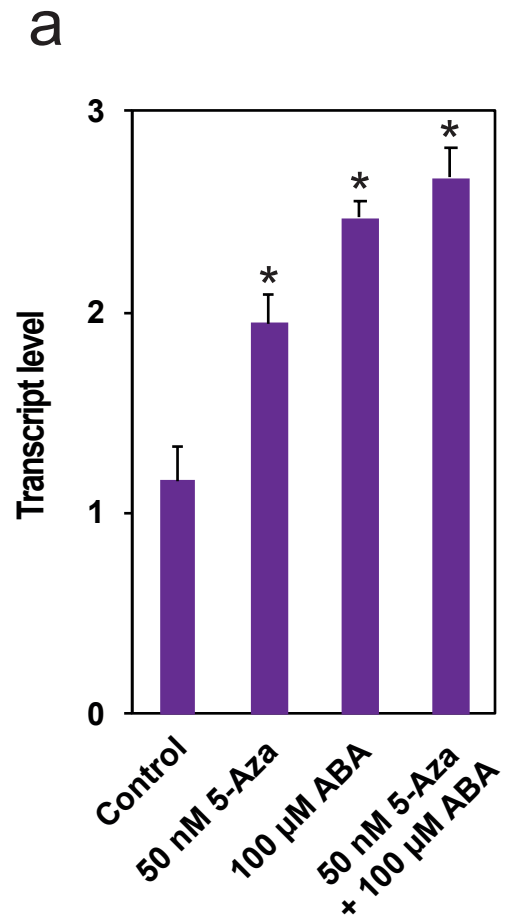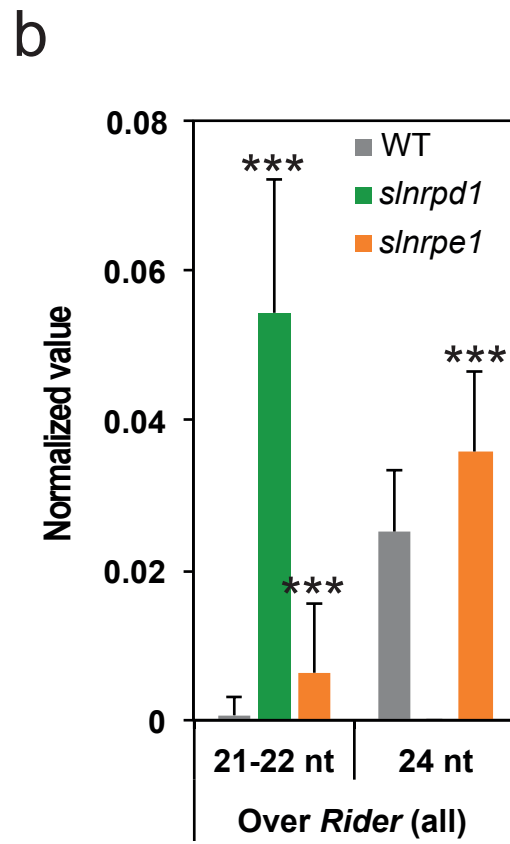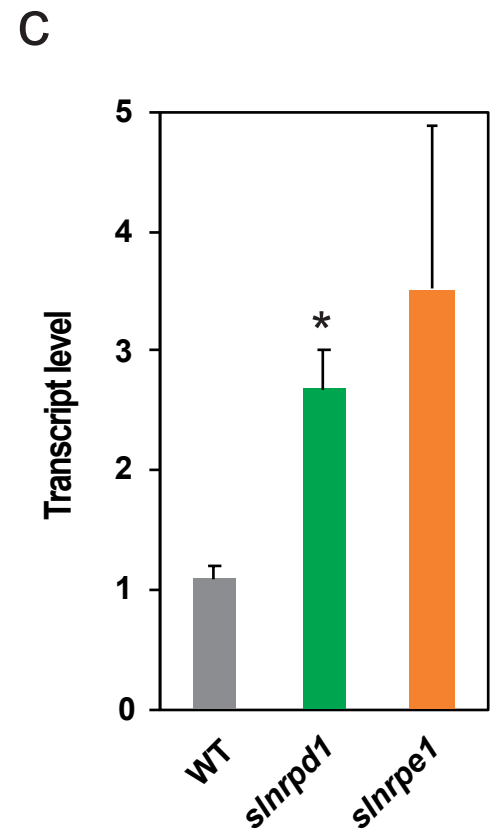

Figure 3

**a**

bioRxiv preprint doi: <https://doi.org/10.1101/517508>; this version posted April 25, 2019. The copyright holder for this preprint (which was not certified by peer review) is the author/funder, who has granted bioRxiv a license to display the preprint in perpetuity. It is made available under aCC-BY-NC-ND 4.0 International license.

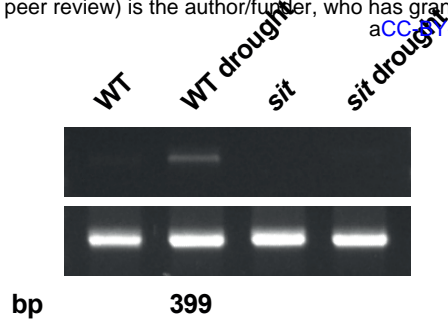**C**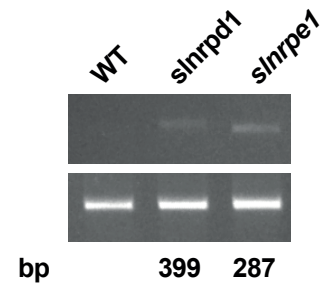**b**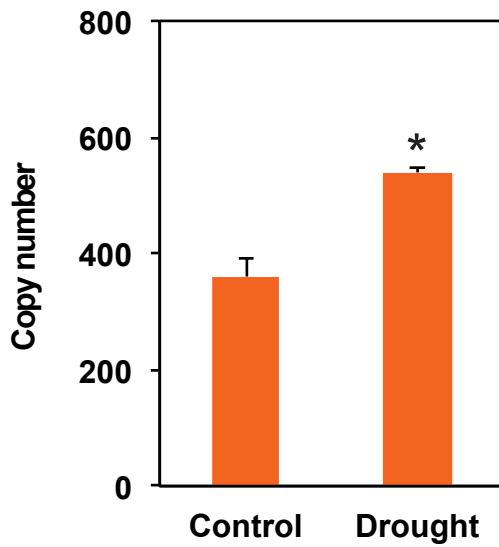**d**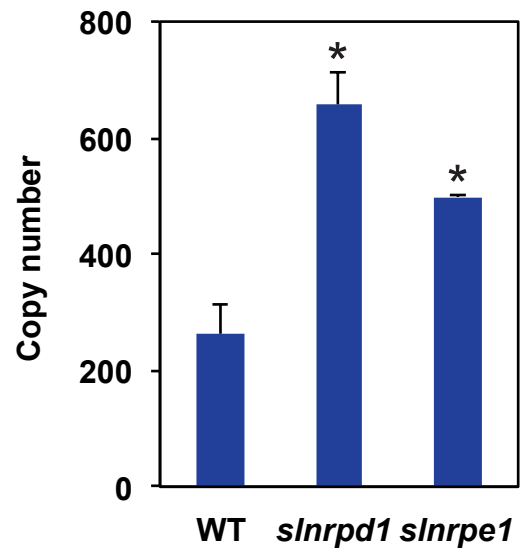**e**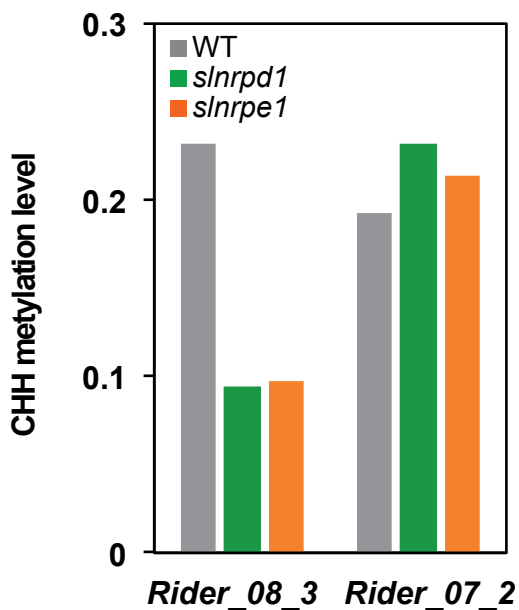**f**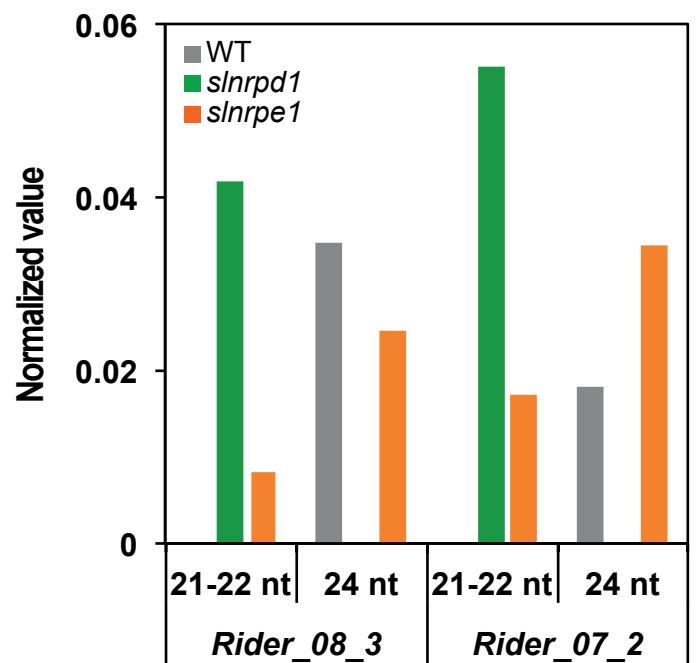

Figure 4

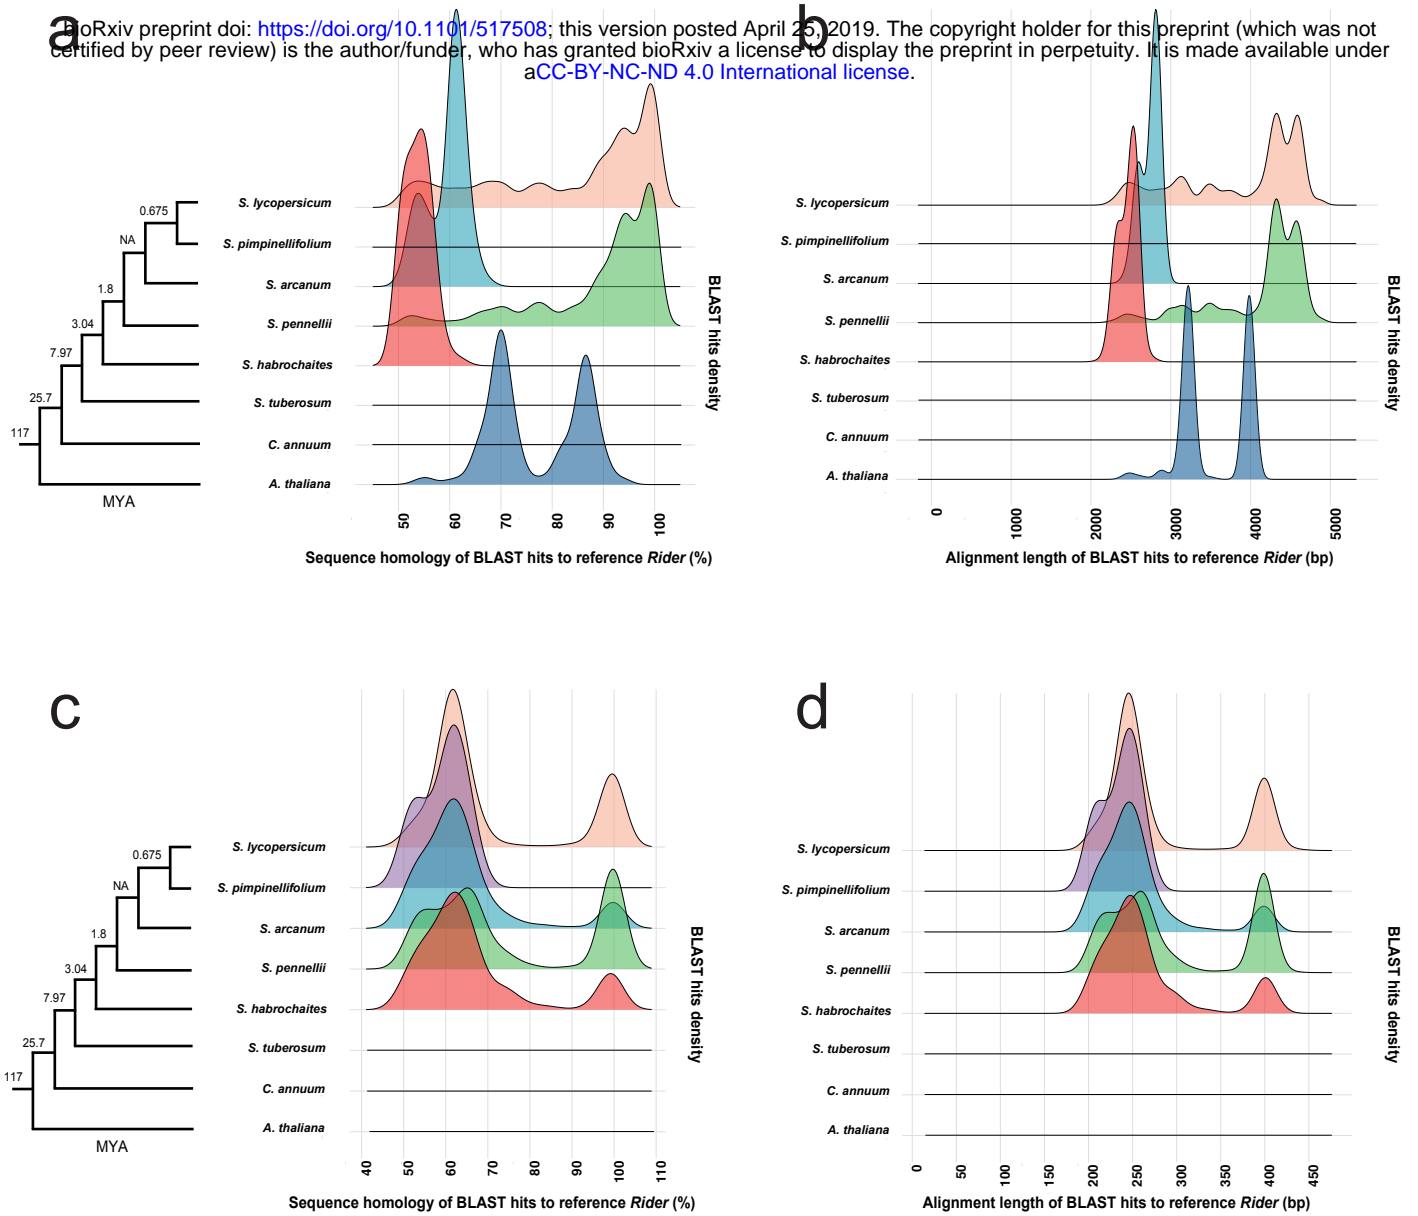

Figure 5

Table 1

|                                               | LTR identity (%) |       |       | Total (%) |
|-----------------------------------------------|------------------|-------|-------|-----------|
|                                               | 98-100           | 95-98 | 85-95 |           |
| Number of elements in chromosome arms         | 5                | 6     | 3     | 19.7      |
| Number of elements in pericentromeric regions | 5                | 23    | 29    | 80.3      |
| Total                                         | 10               | 29    | 32    | 100.0     |

bioRxiv preprint doi: <https://doi.org/10.1101/517508>; this version posted April 25, 2019. The copyright holder for this preprint (which was not certified by peer review) is the author/funder, who has granted bioRxiv a license to display the preprint in perpetuity. It is made available under aCC-BY-NC-ND 4.0 International license.

Table 2

|              | Presence of gene within 2 kb (%) | Number of elements in chromosome arms (%) |
|--------------|----------------------------------|-------------------------------------------|
| Rider_85-95  | 37.5                             | 9.4                                       |
| Rider_95-98  | 48.3                             | 20.7                                      |
| Rider_98-100 | 50.0                             | 50                                        |
